# Supplementary material for: Identification of DNA Methylation Changes That Predict Onset of Post-traumatic Stress Disorder and Depression Following Physical Trauma
Source: Front Neurosci. 2021 Sep 24;15:738347. doi: 10.3389/fnins.2021.738347 (PMC8498101; doi:10.3389/fnins.2021.738347)
Supplement: Supplementary file 3 [file Table_2.xlsx]

## Sheet: All_cases_PTSD_MDD_vs_Control
Chromosome	Start	End	symbol	mean_log2_Experiment_over_Control	adjusted_p_value	methylation_rate_for_all_psychotic	methylation_rate_for_control
chr1	11121	11121	.	6.65821	0.0144402	1	0
chr1	377865	377865	.	6.65821	0.000668116	1	0
chr1	385730	385730	.	-6.65821	0.0262631	0	1
chr1	400301	400301	.	6.65821	0.00323659	1	0
chr1	400810	400810	.	6.65821	0.00323659	1	0
chr1	467286	467286	.	6.65821	6.35966e-09	1	0
chr1	623019	623019	.	6.65821	2.21743e-05	1	0
chr1	1351320	1351320	.	-6.65821	0.00323659	0	1
chr1	1890703	1890703	GNB1	-6.65821	0.000120821	0	1
chr1	3694214	3694214	TP73	6.65821	0.00323659	1	0
chr1	5774506	5774506	.	-0.10174	0.0184719	0.925886	0.994268
chr1	5809554	5809554	.	-0.0785973	0.0228939	0.940237	0.993441
chr1	8319840	8319840	SLC45A1	0.0933841	0.00808056	0.986231	0.923788
chr1	12903003	12903003	.	6.65821	2.84916e-08	1	0
chr1	12903020	12903020	.	6.65821	0.000666966	1	0
chr1	13077770	13077770	PRAMEF25,PRAMEF26	6.65821	4.59714e-06	1	0
chr1	13084695	13084695	.	6.65821	4.59714e-06	1	0
chr1	13180374	13180374	.	1.83915	0.0133942	0.346883	0.0897436
chr1	13195024	13195024	.	6.65821	0.00323659	1	0
chr1	14913212	14913212	KAZN	-0.117401	0.00818959	0.867851	0.942274
chr1	17833063	17833063	.	-0.475899	0.0228498	0.557667	0.779503
chr1	24832807	24832807	CLIC4	6.65821	0.0144402	1	0
chr1	30121438	30121438	.	-0.0986306	0.0393498	0.906278	0.97111
chr1	30463502	30463502	.	-0.148729	0.0266697	0.801052	0.889126
chr1	35092720	35092720	ZMYM1	-2.74512	0.0173776	0.0381277	0.312669
chr1	36083159	36083159	.	-3.41837	0.000812646	0.0295462	0.412802
chr1	37795538	37795538	MANEAL	0.896798	0.0158193	0.155554	0.0789152
chr1	46242170	46242170	.	6.65821	0.00323659	1	0
chr1	46901400	46901400	.	-0.158002	0.0136026	0.87863	0.981481
chr1	55736100	55736100	.	-0.0758861	0.0353895	0.905641	0.955093
chr1	81087095	81087095	.	0.0749428	0.0464208	0.984738	0.934384
chr1	84056876	84056876	.	6.65821	0.00323659	1	0
chr1	84057432	84057432	.	0.985786	0.00593954	1	0.5
chr1	86180853	86180853	.	-0.0995707	0.049442	0.876241	0.939568
chr1	91159462	91159462	.	6.65821	0.00323659	1	0
chr1	95695239	95695239	.	-0.0568184	0.0449127	0.895747	0.93213
chr1	98512488	98512488	.	6.65821	0.00323659	1	0
chr1	102582200	102582200	.	6.65821	0.000666966	1	0
chr1	106502017	106502017	.	-0.0881993	0.0267773	0.90123	0.958677
chr1	108489598	108489598	.	6.65821	0.00323659	1	0
chr1	111271217	111271217	.	1.20097	0.0152264	0.109076	0.0417962
chr1	112293827	112293827	.	6.65821	0.0144402	1	0
chr1	120550535	120550535	PDE4DIPP2	6.65821	4.59714e-06	1	0
chr1	121261751	121261751	SRGAP2C	6.65821	0.0144402	1	0
chr1	121677227	121677227	.	6.65821	0.0144402	1	0
chr1	121690423	121690423	.	6.65821	0.0144402	1	0
chr1	121702507	121702507	.	6.65821	0.000668116	1	0
chr1	121822219	121822219	.	6.65821	0.000120821	1	0
chr1	121929404	121929404	.	6.65821	0.000666966	1	0
chr1	121973973	121973973	.	6.65821	0.00011331	1	0
chr1	122047350	122047350	.	1.51644	0.0144402	0.972222	0.333333
chr1	122090639	122090639	.	6.65821	0.00323659	1	0
chr1	122177123	122177123	.	6.65821	0.000120821	1	0
chr1	122210278	122210278	.	6.65821	4.59714e-06	1	0
chr1	122400714	122400714	.	6.65821	0.00323659	1	0
chr1	122419766	122419766	.	6.65821	0.0144402	1	0
chr1	122494603	122494603	.	-0.146434	0.0157819	0.872998	0.96733
chr1	123194676	123194676	.	1.40816	0.00150658	0.409756	0.14816
chr1	124873840	124873840	.	-0.935476	0.0413679	0.493045	0.952083
chr1	124873849	124873849	.	-0.127232	0.029314	0.849888	0.929167
chr1	143381790	143381790	.	6.65821	4.59714e-06	1	0
chr1	143422997	143422997	LSP1P5	6.65821	0.00323659	1	0
chr1	143444754	143444754	.	0.985786	0.0433118	1	0.5
chr1	143653388	143653388	.	0.865724	0.00440634	0.302686	0.161593
chr1	143675894	143675894	.	1.06533	0.00588899	0.244764	0.111742
chr1	144179723	144179723	.	-6.65821	0.000666966	0	1
chr1	144334479	144334479	.	6.65821	2.21743e-05	1	0
chr1	144783979	144783979	SRGAP2-AS1	0.985786	0.0433118	1	0.5
chr1	144808720	144808720	SRGAP2-AS1	6.65821	0.00323659	1	0
chr1	144857108	144857108	SRGAP2-AS1	6.65821	0.000120821	1	0
chr1	145502056	145502056	.	6.65821	0.0144402	1	0
chr1	146514687	146514687	HYDIN2	6.65821	0.000120821	1	0
chr1	148061734	148061734	PDE4DIPP1	6.65821	6.88987e-07	1	0
chr1	148896260	148896260	PDE4DIP	6.65821	4.59714e-06	1	0
chr1	149113796	149113796	.	-3.82828	0.000286569	0.00694444	0.230688
chr1	153760186	153760186	INTS3	0.0994261	0.0278861	0.997685	0.930578
chr1	156557060	156557060	IQGAP3	6.65821	0.000666966	1	0
chr1	156557065	156557065	IQGAP3	6.65821	0.000666966	1	0
chr1	156557089	156557089	IQGAP3	6.65821	0.00323659	1	0
chr1	159937835	159937835	IGSF9	0.644003	0.0358773	0.306352	0.192445
chr1	161456832	161456832	.	-4.74067	0.00624004	0.0277778	1
chr1	161727375	161727375	FCRLB	-1.89942	0.0364035	0.00231481	0.0359419
chr1	165745445	165745445	TMCO1	-2.47839	0.00638029	0.0744048	0.460368
chr1	165746063	165746063	TMCO1	-3.7187	4.641e-05	0.024212	0.44042
chr1	176314391	176314391	.	-0.166072	0.0459596	0.797433	0.895939
chr1	180214802	180214802	.	6.65821	0.000120821	1	0
chr1	193692642	193692642	.	-0.390444	0.00241872	0.73499	0.96653
chr1	199962868	199962868	.	-0.0608464	0.0426607	0.929459	0.969928
chr1	200321689	200321689	.	0.0792374	0.000313162	0.996914	0.943103
chr1	203386287	203386287	.	-0.110823	0.0220455	0.92532	1
chr1	207683399	207683399	CR1L	-0.182514	0.00454352	0.851732	0.967945
chr1	208422066	208422066	.	-0.153003	0.0481575	0.835347	0.929926
chr1	211927191	211927191	.	2.85088	0.0459957	0.434315	0.0515873
chr1	218098504	218098504	.	-0.0936453	0.0375954	0.913183	0.975094
chr1	223683011	223683011	.	0.468644	0.0452914	0.980539	0.705807
chr1	225968310	225968310	.	-0.222121	0.0254096	0.751964	0.878791
chr1	227275835	227275835	CDC42BPA	0.173653	0.00638029	0.991505	0.877929
chr1	228626940	228626940	.	6.65821	4.59714e-06	1	0
chr1	228626957	228626957	.	6.65821	4.59714e-06	1	0
chr1	239975274	239975274	.	-6.65821	0.000401919	0	1
chr1	240986650	240986650	RGS7	6.65821	0.0144402	1	0
chr1	242225684	242225684	PLD5	-0.117905	0.0121463	0.865387	0.939933
chr1	248210179	248210179	.	-0.0700281	0.0281152	0.9111	0.956912
chr1	248637746	248637746	.	6.65821	8.42046e-07	1	0
chr10	385791	385791	DIP2C	1.64374	0.0445538	0.679004	0.210499
chr10	436974	436974	DIP2C	1.5577	0.0446535	0.65981	0.21753
chr10	1412901	1412901	ADARB2	0.725293	0.0251144	0.598989	0.358362
chr10	5716863	5716863	TASOR2	2.3083	0.0168255	0.394572	0.0716821
chr10	18340673	18340673	CACNB2	0.968372	0.0261323	0.529305	0.265629
chr10	21177195	21177195	NEBL	-0.327781	0.0339807	0.792125	0.996732
chr10	29242384	29242384	.	2.29842	0.000353491	0.961538	0.1875
chr10	38262922	38262922	.	1.47803	0.0193283	0.484716	0.167593
chr10	38297098	38297098	.	1.53009	0.0439059	0.597318	0.200287
chr10	38354621	38354621	.	1.33765	0.0493985	0.469395	0.17968
chr10	38365068	38365068	HSD17B7P2	1.28818	0.0490301	0.546148	0.217725
chr10	38422690	38422690	.	1.51969	0.00777838	0.696229	0.236305
chr10	38483164	38483164	.	1.69034	0.0380302	0.485027	0.143386
chr10	38490703	38490703	.	1.75912	0.0144402	0.643814	0.183155
chr10	38499912	38499912	.	1.27981	0.0280664	0.571673	0.229562
chr10	38513818	38513818	.	1.89208	0.00695708	0.644098	0.166226
chr10	38517012	38517012	.	1.56482	0.00548322	0.493336	0.160137
chr10	38517910	38517910	.	1.53327	0.0123558	0.611381	0.204682
chr10	38518596	38518596	.	1.48288	0.0115302	0.589162	0.204365
chr10	38523082	38523082	.	1.3517	0.00451935	0.593617	0.226515
chr10	38527093	38527093	.	1.28689	0.0198861	0.336497	0.132006
chr10	38631937	38631937	.	1.41223	0.0208962	0.782928	0.287926
chr10	38650099	38650099	.	1.20957	0.0126732	0.499248	0.210198
chr10	38657566	38657566	.	1.26508	0.0160738	0.581577	0.236141
chr10	38659330	38659330	.	1.85074	0.042114	0.265692	0.0664354
chr10	38668191	38668191	.	1.27897	0.0495469	0.433442	0.172737
chr10	38670858	38670858	.	1.19282	0.0445189	0.432411	0.183532
chr10	38703378	38703378	.	1.66644	0.00235112	0.37735	0.112027
chr10	38704282	38704282	.	1.681	0.00204979	0.398148	0.117287
chr10	38730602	38730602	.	1.17738	0.025634	0.535348	0.231128
chr10	38765176	38765176	.	1.40699	0.0201538	0.831381	0.307283
chr10	38770838	38770838	.	1.40373	0.019878	0.541041	0.198266
chr10	38771504	38771504	.	1.48033	0.0167252	0.551285	0.191168
chr10	38785162	38785162	.	1.33387	0.0144402	0.573576	0.221507
chr10	38789113	38789113	.	1.61901	0.0121202	0.582948	0.183039
chr10	38792585	38792585	.	1.38557	0.0375745	0.550163	0.204396
chr10	38805608	38805608	.	1.44516	0.00715637	0.526296	0.186956
chr10	38806759	38806759	.	1.63969	0.0217206	0.536824	0.16549
chr10	38812913	38812913	.	1.36104	0.0332278	0.660241	0.250926
chr10	38815171	38815171	.	1.29674	0.0231419	0.40646	0.159518
chr10	38829084	38829084	.	1.19477	0.011001	0.439122	0.186202
chr10	38830402	38830402	.	1.2125	0.0152264	0.485537	0.203834
chr10	38836576	38836576	.	1.36405	0.0235057	0.54411	0.205267
chr10	38859625	38859625	.	6.65821	0.0144402	1	0
chr10	38903779	38903779	.	6.65821	0.0144402	1	0
chr10	38928587	38928587	.	1.4228	0.00454352	0.485996	0.175
chr10	38957508	38957508	.	1.37322	0.0424494	0.352871	0.130078
chr10	38974198	38974198	.	1.82296	0.0272116	0.543591	0.146467
chr10	38995757	38995757	.	1.30343	0.0149573	0.619446	0.245027
chr10	38996365	38996365	.	1.63109	0.0110985	0.417967	0.128166
chr10	39000198	39000198	.	1.25246	0.0144402	0.579497	0.23743
chr10	39016924	39016924	.	1.11659	0.0273642	0.413249	0.185195
chr10	39030329	39030329	.	1.69621	0.0144402	0.46982	0.13807
chr10	39035923	39035923	.	1.66611	0.000695998	0.578826	0.17554
chr10	39037672	39037672	.	1.6055	0.0291748	0.39712	0.123789
chr10	39597760	39597760	.	6.65821	0.00323659	1	0
chr10	39696011	39696011	.	6.65821	0.0144402	1	0
chr10	39718881	39718881	.	6.63572	0.00804884	0.984375	0
chr10	39732105	39732105	.	6.65821	0.00323659	1	0
chr10	39738301	39738301	.	6.63048	0.0481868	0.980769	0
chr10	39749175	39749175	.	0.985786	0.0433118	1	0.5
chr10	39749184	39749184	.	1.55667	0.0309173	1	0.333333
chr10	39791548	39791548	.	1.55667	0.000260646	1	0.333333
chr10	39796066	39796066	.	6.65821	0.0144402	1	0
chr10	39796075	39796075	.	6.65821	0.00323659	1	0
chr10	39813538	39813538	.	6.65821	0.0144402	1	0
chr10	39825616	39825616	.	6.65821	0.0144402	1	0
chr10	39850992	39850992	.	6.65821	0.00323659	1	0
chr10	40048493	40048493	.	6.65821	0.0144402	1	0
chr10	40131027	40131027	.	0.451546	0.0211467	1	0.728571
chr10	40236857	40236857	.	6.65821	0.000666966	1	0
chr10	40250363	40250363	.	0.577838	0.00213813	1	0.666667
chr10	40435059	40435059	.	6.65821	0.000668116	1	0
chr10	40471246	40471246	.	0.985786	0.00593954	1	0.5
chr10	40519553	40519553	.	6.61287	0.0187898	0.96875	0
chr10	40521067	40521067	.	0.577838	0.0144402	1	0.666667
chr10	40636864	40636864	.	0.49163	0.00128006	1	0.708333
chr10	40641896	40641896	.	6.65821	0.0144402	1	0
chr10	40642576	40642576	.	6.65821	0.0144402	1	0
chr10	40755059	40755059	.	6.65821	0.000120821	1	0
chr10	40894187	40894187	.	6.65821	0.000666966	1	0
chr10	41048699	41048699	.	6.65821	0.0144402	1	0
chr10	41118637	41118637	.	6.65821	0.00454352	1	0
chr10	41129517	41129517	.	6.65821	0.0144402	1	0
chr10	41147704	41147704	.	0.985786	0.0433118	1	0.5
chr10	41157299	41157299	.	6.65821	0.00454352	1	0
chr10	41224618	41224618	.	6.65821	0.0144402	1	0
chr10	41311058	41311058	.	6.65821	8.42046e-07	1	0
chr10	41339581	41339581	.	6.65821	0.0144402	1	0
chr10	41362185	41362185	.	6.65821	0.0144402	1	0
chr10	41703674	41703674	.	1.16926	0.0212786	0.870911	0.381696
chr10	45008431	45008431	.	2.55711	0.00307152	0.372416	0.0549784
chr10	45018915	45018915	.	2.6788	0.00454352	0.685366	0.0985958
chr10	45024061	45024061	.	2.76455	0.0451567	0.401154	0.0505051
chr10	45061335	45061335	.	2.64493	0.0222395	0.478561	0.0681115
chr10	52036981	52036981	PRKG1	-0.0588449	0.0494361	0.936098	0.975485
chr10	68398089	68398089	RUFY2	0.0784914	0.0262396	0.997123	0.943793
chr10	68593188	68593188	TET1	0.179478	0.0328445	0.994792	0.877254
chr10	69941807	69941807	COL13A1	1.83654	0.000406504	0.762742	0.206362
chr10	69949617	69949617	COL13A1	1.53608	0.0144402	0.63787	0.213399
chr10	69950505	69950505	COL13A1	1.44635	0.00610601	0.587521	0.209259
chr10	70087452	70087452	MACROH2A2	-0.132404	0.046319	0.876245	0.961429
chr10	74310150	74310150	ADK	0.0900698	0.0294184	0.989631	0.929131
chr10	79852042	79852042	.	6.65821	0.0144402	1	0
chr10	84257261	84257261	RGR	1.65129	0.0131237	0.139119	0.0374729
chr10	85356460	85356460	.	6.65821	4.59714e-06	1	0
chr10	87227587	87227587	NUTM2A	6.65821	0.00323659	1	0
chr10	87270621	87270621	NUTM2A-AS1	6.65821	0.00011331	1	0
chr10	92674984	92674984	.	6.65821	0.0211048	1	0
chr10	93463383	93463383	MYOF	1.05671	0.0433118	0.346033	0.161155
chr10	101224166	101224166	.	0.479414	0.0144402	0.195488	0.13739
chr10	104042650	104042650	COL17A1	0.0924906	0.0379579	0.977923	0.916575
chr10	104945286	104945286	SORCS3	-0.0750586	0.0144402	0.867553	0.914418
chr10	110752117	110752117	RBM20	-1.77957	0.0396602	0.113628	0.414442
chr10	110752127	110752127	RBM20	-1.72277	0.0190777	0.10635	0.374035
chr10	110755976	110755976	RBM20	-1.54449	0.0263122	0.128511	0.394038
chr10	117841472	117841472	.	2.78839	0.0144402	0.419027	0.0521007
chr10	117947230	117947230	.	-1.44467	0.00501092	0.281911	0.784585
chr10	117952170	117952170	.	1.17862	0.0278697	0.725057	0.31473
chr10	117971770	117971770	.	-4.44643	2.32968e-05	0.00130208	0.236415
chr10	117990902	117990902	.	-4.10668	0.0112206	0.00184054	0.193988
chr10	128850753	128850753	.	-0.06862	0.0496698	0.904351	0.948892
chr10	131165169	131165169	TCERG1L	-1.18012	0.0309357	0.352682	0.811823
chr10	132809111	132809111	CFAP46	0.18651	0.0465285	0.96159	0.843764
chr10	133140274	133140274	.	-2.26489	0.0212276	0.174138	0.875
chr10	133761567	133761567	.	6.65821	0.0262631	1	0
chr11	112927	112927	.	6.65821	0.0144402	1	0
chr11	128048	128048	LINC01001	6.65821	0.0144402	1	0
chr11	2100732	2100732	.	-0.168817	0.0129373	0.848812	0.955421
chr11	3087275	3087275	OSBPL5	0.985249	0.0270237	0.400705	0.197463
chr11	3267666	3267666	.	6.65821	0.0144402	1	0
chr11	4335310	4335310	.	0.985786	0.00231365	1	0.5
chr11	6499433	6499433	DNHD1	-1.20513	0.0444708	0.271285	0.638524
chr11	11481980	11481980	GALNT18	1.09001	0.00789497	0.726888	0.33616
chr11	14351826	14351826	RRAS2	0.116691	0.00432163	0.995833	0.917681
chr11	16806190	16806190	PLEKHA7	-0.0748883	0.0280092	0.931006	0.981142
chr11	20548714	20548714	.	6.6022	0.00415147	0.961538	0
chr11	20602803	20602803	SLC6A5	1.45553	0.0433827	0.239188	0.0808591
chr11	21246586	21246586	NELL1	0.740689	0.012337	0.681904	0.404072
chr11	23150138	23150138	.	2.68991	0.000286569	0.531194	0.0738706
chr11	32429146	32429146	WT1	1.24098	0.0195143	0.156494	0.0604414
chr11	32923538	32923538	QSER1	0.684847	0.00915795	0.86843	0.536447
chr11	32969399	32969399	QSER1	0.778676	0.0380302	0.892942	0.516326
chr11	33081947	33081947	.	0.0411808	0.0318057	0.998698	0.970312
chr11	34846053	34846053	.	-0.15538	0.00544548	0.840218	0.936901
chr11	36144784	36144784	LDLRAD3	6.65821	0.000120821	1	0
chr11	36553657	36553657	RAG1	-2.42117	0.011789	0.178571	1
chr11	37852530	37852530	.	-0.09554	0.0369941	0.877768	0.938549
chr11	42518485	42518485	.	-0.20738	0.0301704	0.773275	0.894361
chr11	43390127	43390127	TTC17	0.800131	0.0337752	0.830212	0.472531
chr11	44364986	44364986	.	0.508214	0.0119941	0.954527	0.668152
chr11	44647929	44647929	.	1.80191	0.000273792	0.380315	0.10194
chr11	44650715	44650715	.	2.36433	0.0458766	0.370464	0.0638889
chr11	49032657	49032657	TRIM49B	-2.06334	0.0219955	0.129137	0.571525
chr11	50183563	50183563	.	-0.163463	0.0388943	0.811401	0.909946
chr11	50336888	50336888	.	2.4999	0.00221619	0.445923	0.0706019
chr11	50468112	50468112	.	1.81932	0.0238827	0.319387	0.0833333
chr11	50468437	50468437	.	2.25841	0.0240963	0.259933	0.0464165
chr11	50586886	50586886	.	1.952	0.0355793	0.396884	0.0951621
chr11	50615839	50615839	.	1.92037	0.0309173	0.252842	0.0594392
chr11	50693385	50693385	.	2.0121	0.0273642	0.327667	0.0737118
chr11	53752907	53752907	.	6.65821	2.21743e-05	1	0
chr11	54016250	54016250	.	6.65821	0.0144402	1	0
chr11	54325696	54325696	.	0.972118	0.0433118	0.990476	0.5
chr11	55191440	55191440	.	1.4178	0.0176509	0.774098	0.283474
chr11	55735637	55735637	.	1.31934	0.000403687	0.577735	0.225517
chr11	55817722	55817722	.	1.68927	0.00170876	0.746684	0.224635
chr11	55867223	55867223	.	1.4324	0.0352057	0.755856	0.27376
chr11	55910085	55910085	.	1.50363	0.000385962	0.719516	0.247274
chr11	55992762	55992762	.	1.61272	9.29139e-05	0.740894	0.235528
chr11	56032767	56032767	.	1.6685	0.00011125	0.73862	0.2255
chr11	56218285	56218285	.	1.70819	0.00102143	0.596305	0.175556
chr11	56219486	56219486	.	1.53462	4.80974e-06	0.600254	0.200641
chr11	56260250	56260250	.	1.4292	0.00325792	0.607267	0.219214
chr11	56324012	56324012	.	1.98058	1.29645e-06	0.443044	0.104796
chr11	56342874	56342874	.	1.55276	0.0033187	0.678211	0.224581
chr11	56361299	56361299	.	1.08938	0.0361257	0.786999	0.364559
chr11	56365765	56365765	.	1.49061	0.00237323	0.771131	0.267974
chr11	56393944	56393944	.	1.54734	0.000180097	0.758436	0.252912
chr11	56399609	56399609	.	1.32886	0.0179469	0.705579	0.27486
chr11	56415529	56415529	.	1.4509	0.0299352	0.739894	0.264307
chr11	56424037	56424037	.	1.58702	0.00017809	0.763912	0.247604
chr11	56559497	56559497	.	1.08953	0.0397884	0.849215	0.393759
chr11	56563069	56563069	.	1.41345	0.000727698	0.620599	0.226735
chr11	56649955	56649955	.	1.07308	0.0431971	0.747399	0.349995
chr11	59057073	59057073	LOC283194	0.149695	0.0276645	0.990544	0.891931
chr11	60790304	60790304	MS4A10	-0.120618	0.0273962	0.840531	0.914698
chr11	61223661	61223661	PGA4	6.65821	0.00323659	1	0
chr11	61574805	61574805	SYT7	-0.147643	0.00323659	0.886111	0.982674
chr11	62056103	62056103	.	1.99084	0.00765131	0.534375	0.12696
chr11	63920598	63920598	.	-0.316667	0.0246984	0.777852	0.97123
chr11	67372603	67372603	CLCF1,LOC100130987	-6.65821	0.0144402	0	1
chr11	70065270	70065270	ANO1,LINC02753	-0.0879219	0.0337346	0.889872	0.946419
chr11	76731776	76731776	.	-0.10222	0.00260846	0.903407	0.970472
chr11	78684171	78684171	TENM4	-1.06941	0.0414895	0.3744	0.796691
chr11	79191211	79191211	TENM4	6.65821	0.00323659	1	0
chr11	81939726	81939726	MIR4300HG	-0.189267	0.0211048	0.805912	0.92029
chr11	85688325	85688325	.	0.14977	0.0395271	0.946348	0.852046
chr11	87001597	87001597	.	-1.48236	0.0039177	0.240448	0.689763
chr11	89879035	89879035	.	6.65821	3.13582e-07	1	0
chr11	89890198	89890198	.	6.65821	0.000666966	1	0
chr11	91362078	91362078	.	-0.193263	0.010155	0.83053	0.951018
chr11	93640343	93640343	.	0.812117	0.0255282	0.702629	0.395874
chr11	95321184	95321184	.	6.65821	0.00323659	1	0
chr11	100128710	100128710	CNTN5	3.05879	0.0395271	0.348402	0.0330113
chr11	103540151	103540151	.	6.65821	0.0144402	1	0
chr11	113819269	113819269	USP28	0.65173	0.00742108	0.905087	0.572468
chr11	125289714	125289714	PKNOX2	-1.76157	0.019103	0.165727	0.585835
chr11	131606574	131606574	NTM	2.59491	0.0369091	0.56327	0.0848888
chr11	132466478	132466478	OPCML	1.5669	0.00772974	0.654848	0.214408
chr11	132466533	132466533	OPCML	1.3763	0.00177118	0.769183	0.290145
chr11	132470405	132470405	OPCML	1.82743	0.000250976	0.546833	0.146897
chr11	132471960	132471960	OPCML	1.72632	0.00011331	0.517895	0.149542
chr11	132477362	132477362	OPCML	1.62225	0.00082683	0.461534	0.143167
chr11	134530278	134530278	.	-6.65821	0.0262631	0	1
chr12	922331	922331	RAD52	0.0561852	0.0262259	0.99592	0.957498
chr12	4438227	4438227	FGF6	-0.0633941	0.0219955	0.922412	0.964297
chr12	8418610	8418610	.	6.65821	2.21743e-05	1	0
chr12	9168671	9168671	PZP	3.12361	0.0347642	0.446361	0.0423611
chr12	9171201	9171201	PZP	2.83818	0.0452914	0.487774	0.0596071
chr12	9188113	9188113	PZP	-1.3635	0.0146478	0.27253	0.716975
chr12	12824465	12824465	DDX47	-0.545693	0.0143557	0.678985	0.995726
chr12	22358958	22358958	.	-1.90661	0.0148641	0.0920246	0.372518
chr12	22363447	22363447	.	0.545556	0.0342184	0.939112	0.640263
chr12	22365617	22365617	.	-2.06279	0.014158	0.0793875	0.363454
chr12	22371376	22371376	.	-2.09226	0.0298571	0.0781665	0.365955
chr12	22382826	22382826	.	0.542229	0.0262259	0.928781	0.63467
chr12	29600249	29600249	TMTC1	-0.105511	0.0258027	0.881781	0.949445
chr12	30555320	30555320	.	1.20669	0.0144402	0.63375	0.268913
chr12	30623833	30623833	.	1.1809	0.0294184	0.746521	0.323684
chr12	30638083	30638083	IPO8	1.36144	0.040651	0.618014	0.23442
chr12	31118315	31118315	OVOS2	-6.65821	0.000666966	0	1
chr12	34809938	34809938	.	6.65821	8.42046e-07	1	0
chr12	35116869	35116869	.	6.65821	2.84916e-08	1	0
chr12	35828451	35828451	.	6.65821	0.000668116	1	0
chr12	36349008	36349008	.	6.65821	0.0144402	1	0
chr12	37238226	37238226	.	6.57659	0.0144402	0.944444	0
chr12	43673963	43673963	.	-0.0959602	0.0487641	0.855669	0.915207
chr12	47077655	47077655	AMIGO2	-0.947304	0.0144402	0.472203	0.919815
chr12	48951805	48951805	ARF3	0.107741	0.0159709	0.987684	0.915891
chr12	52086611	52086611	OR7E47P,SMIM41	-0.0813329	0.0465285	0.895065	0.947554
chr12	54732804	54732804	.	-0.625644	0.00823929	0.630063	0.977553
chr12	55268758	55268758	.	0.13336	0.00797954	0.983687	0.89595
chr12	66574098	66574098	GRIP1	1.17606	0.0335239	0.653972	0.283848
chr12	66574552	66574552	GRIP1	1.07206	0.0024878	0.721446	0.337904
chr12	66577022	66577022	GRIP1	1.16637	0.0120614	0.663125	0.289906
chr12	66581949	66581949	GRIP1	1.14668	0.0356114	0.711354	0.315809
chr12	66588841	66588841	GRIP1	1.26331	0.000948704	0.885975	0.363253
chr12	67536643	67536643	LINC02408	0.106848	0.0417535	0.979744	0.909091
chr12	69112945	69112945	.	-0.385132	0.00154829	0.747021	0.978654
chr12	71963008	71963008	TPH2	-0.234945	0.00011331	0.848214	1
chr12	98166111	98166111	.	-3.01026	0.0421422	0.0258864	0.279139
chr12	104942854	104942854	SLC41A2	1.73869	0.0144402	0.502738	0.143637
chr12	107218494	107218494	.	-0.158308	0.049492	0.808421	0.90334
chr12	111723313	111723313	ACAD10	6.65821	0.00323659	1	0
chr12	115132454	115132454	.	0.844696	0.0375745	0.545643	0.299398
chr12	121826741	121826741	SETD1B	-1.34552	0.0454839	0.309109	0.800926
chr12	121993875	121993875	CFAP251	6.65821	0.0144402	1	0
chr12	124102431	124102431	ZNF664-RFLNA	0.118885	0.0360469	0.991667	0.912434
chr12	127292573	127292573	.	-1.33304	0.0224065	0.289741	0.745145
chr12	127294386	127294386	.	-1.72701	0.0177481	0.205333	0.702841
chr12	127303510	127303510	.	-1.47405	0.0144402	0.234795	0.670042
chr12	127314923	127314923	.	-1.64015	0.0195143	0.200232	0.645292
chr12	128234783	128234783	.	1.34141	0.0429243	0.34513	0.130147
chr12	128243235	128243235	.	1.63178	0.0228939	0.565242	0.175625
chr12	129203964	129203964	TMEM132D	1.20649	0.0144402	0.618709	0.262432
chr12	129242754	129242754	TMEM132D	0.729823	0.0281152	0.861103	0.515256
chr12	129856946	129856946	TMEM132D	1.61867	0.0260278	0.904762	0.287879
chr12	130464545	130464545	RIMBP2	1.23443	0.0204447	0.751198	0.313518
chr12	130467664	130467664	RIMBP2	1.14321	0.0144402	0.737056	0.328231
chr12	131597785	131597785	.	0.864045	0.0347144	0.829824	0.451408
chr12	131597992	131597992	.	1.6803	0.0144402	0.685622	0.207047
chr12	131701208	131701208	.	6.65821	0.00323659	1	0
chr12	132025773	132025773	EP400	0.0468297	0.0433118	0.991836	0.959839
chr12	132200369	132200369	GALNT9	-0.186448	0.0267773	0.775564	0.883939
chr12	132537012	132537012	FBRSL1	0.0703358	0.0144402	0.990094	0.942506
chr12	132564652	132564652	FBRSL1	0.440543	0.0262631	0.952941	0.69955
chr13	16248562	16248562	.	6.65821	0.00323659	1	0
chr13	19834174	19834174	ZMYM5	0.0731473	0.0205653	0.99203	0.942491
chr13	38615866	38615866	LINC00437	-0.11973	0.0291748	0.858868	0.934052
chr13	43970881	43970881	.	0.0694726	0.00593485	0.997396	0.950034
chr13	44683205	44683205	LINC00407	-1.15364	0.0478939	0.389643	0.879104
chr13	49011294	49011294	FNDC3A	0.0713199	0.029737	0.99332	0.944927
chr13	49676763	49676763	EBPL	-0.819884	0.0284115	0.53271	0.948028
chr13	49678442	49678442	EBPL	-0.524956	0.0433118	0.652676	0.943519
chr13	49684618	49684618	EBPL	-0.85329	0.0391841	0.512251	0.933507
chr13	49688485	49688485	EBPL	-0.973371	0.00484771	0.431783	0.857407
chr13	50672552	50672552	.	-0.148221	0.00548322	0.882801	0.979404
chr13	51096658	51096658	C13orf42	-0.0593502	0.00475237	0.950204	0.990529
chr13	59598640	59598640	.	6.65821	0.0144402	1	0
chr13	71125023	71125023	LINC00348	-0.065914	0.0360469	0.922273	0.965854
chr13	76408466	76408466	.	-0.238045	0.0188242	0.766007	0.905218
chr13	76457280	76457280	.	0.0988652	0.0271186	0.970152	0.905234
chr13	77600364	77600364	SCEL,SCEL-AS1	-0.118164	0.0092714	0.902993	0.980919
chr13	81189097	81189097	.	-1.39211	0.0365581	0.229195	0.617795
chr13	86261463	86261463	.	6.65821	1.59113e-07	1	0
chr13	92691529	92691529	GPC5	-0.804096	0.0235057	0.550606	0.968847
chr13	95365125	95365125	.	-0.120124	0.0309235	0.900058	0.979076
chr13	106456167	106456167	.	2.02466	0.00893961	0.487593	0.11229
chr13	106620904	106620904	LINC00551	-0.0958846	0.0426607	0.872937	0.933613
chr13	106843286	106843286	.	1.31316	0.0444344	0.694558	0.273541
chr13	107189663	107189663	FAM155A	5.02847	0.013244	0.316378	0
chr13	108091583	108091583	.	-0.142854	0.0144937	0.855961	0.946096
chr13	108515263	108515263	.	-6.65821	0.0262631	0	1
chr13	108632836	108632836	MYO16	0.96945	0.0262631	0.829096	0.418527
chr13	108633561	108633561	MYO16	0.952238	0.0110455	0.664086	0.338388
chr13	108650497	108650497	MYO16	0.972778	0.0414963	0.784116	0.394621
chr13	111689352	111689352	.	0.985786	0.000668116	1	0.5
chr13	113538766	113538766	TMCO3	0.0644904	0.0306622	0.98573	0.9422
chr13	113543196	113543196	TMCO3	6.62379	0.00101972	0.97619	0
chr13	113638457	113638457	TFDP1	0.0487764	0.00605973	0.997172	0.963689
chr13	113656932	113656932	ATP4B	0.177824	0.0388002	0.976702	0.86228
chr14	16038070	16038070	.	6.65821	0.000666966	1	0
chr14	18566379	18566379	.	6.65821	2.21743e-05	1	0
chr14	18866446	18866446	.	6.65821	0.0144402	1	0
chr14	18926693	18926693	.	6.61287	0.0187898	0.96875	0
chr14	19038714	19038714	.	0.229415	0.0144139	0.981481	0.835714
chr14	19057854	19057854	.	6.65821	2.21743e-05	1	0
chr14	23151062	23151062	SLC7A8	-0.0998132	0.0490525	0.900492	0.965714
chr14	24656388	24656388	.	-4.13498	0.000281898	0.0014881	0.191837
chr14	24662254	24662254	.	-3.80726	0.000230179	0.000672043	0.139399
chr14	26343304	26343304	.	-0.109259	0.0144402	0.886937	0.957502
chr14	33898709	33898709	.	-0.0662007	0.0431855	0.950456	0.995556
chr14	34546522	34546522	.	-6.65821	0.000666966	0	1
chr14	34560535	34560535	.	1.55667	0.0303581	1	0.333333
chr14	45601196	45601196	.	-0.0815343	0.0158193	0.928152	0.982698
chr14	59023674	59023674	.	-0.0557828	0.0210921	0.88773	0.923121
chr14	67102213	67102213	GPHN	0.0695475	0.0414963	0.995833	0.948496
chr14	68917610	68917610	ACTN1	-0.109845	0.0461735	0.911196	0.984074
chr14	69973012	69973012	SMOC1	-0.0659889	0.0442183	0.901301	0.943952
chr14	75548697	75548697	.	-4.25108	0.00572794	0.00555556	0.286203
chr14	88352645	88352645	.	0.923474	0.0414963	0.670871	0.348981
chr14	92585368	92585368	RIN3	1.08364	0.000285993	0.482203	0.22224
chr14	93161118	93161118	.	-1.05403	0.0413132	0.396149	0.833296
chr14	93740766	93740766	PRIMA1	-2.0752	0.031629	0.0924297	0.421641
chr14	94467272	94467272	SERPINA9	-0.163571	0.0389969	0.866891	0.972168
chr14	95420629	95420629	SYNE3	0.0629719	0.0197811	0.992936	0.950101
chr14	100870142	100870142	.	0.985786	0.0433118	1	0.5
chr14	102676930	102676930	RCOR1	6.65821	0.00323659	1	0
chr14	102677185	102677185	RCOR1	6.65821	0.00323659	1	0
chr14	103274235	103274235	.	2.13928	0.000694006	0.15311	0.0270248
chr14	104181984	104181984	.	0.392511	0.00816484	0.969229	0.735979
chr15	17200276	17200276	.	6.65821	0.00454352	1	0
chr15	17340602	17340602	.	-6.65821	0.0144402	0	1
chr15	17345351	17345351	.	-6.65821	0.0144402	0	1
chr15	17372684	17372684	.	6.65821	0.000668116	1	0
chr15	17380438	17380438	.	6.65821	0.00011331	1	0
chr15	17505974	17505974	.	6.65821	0.00323659	1	0
chr15	17575582	17575582	.	6.65821	4.55267e-05	1	0
chr15	17641890	17641890	.	6.65821	0.00454352	1	0
chr15	17756508	17756508	.	6.65821	0.00323659	1	0
chr15	17781923	17781923	.	6.65821	4.59714e-06	1	0
chr15	17860688	17860688	.	6.65821	0.0144402	1	0
chr15	17956777	17956777	.	6.65821	0.00323659	1	0
chr15	17999464	17999464	.	6.65821	0.00454352	1	0
chr15	18108617	18108617	.	6.65821	0.0262631	1	0
chr15	18257667	18257667	.	6.65821	0.00011331	1	0
chr15	18257878	18257878	.	6.65821	0.0262631	1	0
chr15	18400267	18400267	.	6.65821	0.00323659	1	0
chr15	18653207	18653207	.	6.65821	0.00323659	1	0
chr15	18694071	18694071	.	6.65821	0.000120821	1	0
chr15	18704475	18704475	.	6.65821	0.0262631	1	0
chr15	18853421	18853421	.	6.65821	0.0211048	1	0
chr15	18926409	18926409	.	6.65821	0.0144402	1	0
chr15	18933409	18933409	.	6.65821	0.0144402	1	0
chr15	19002235	19002235	.	6.65821	0.0144402	1	0
chr15	19025853	19025853	.	-6.65821	0.00454352	0	1
chr15	19033755	19033755	.	0.985786	0.0155861	1	0.5
chr15	19236618	19236618	.	6.65821	0.00323659	1	0
chr15	19237972	19237972	.	6.65821	0.000666966	1	0
chr15	19321923	19321923	.	6.65821	0.0144402	1	0
chr15	19456110	19456110	.	6.65821	0.00454352	1	0
chr15	19485618	19485618	.	6.65821	0.0144402	1	0
chr15	19488515	19488515	.	2.38483	0.00168864	0.912698	0.166667
chr15	19562035	19562035	.	6.65821	0.00323659	1	0
chr15	19629823	19629823	.	6.65821	0.0262631	1	0
chr15	20458324	20458324	HERC2P3	6.65821	0.00323659	1	0
chr15	20567916	20567916	GOLGA8CP	6.65821	0.0144402	1	0
chr15	20596599	20596599	.	6.65821	0.000120821	1	0
chr15	20872823	20872823	.	6.65821	0.0144402	1	0
chr15	21050477	21050477	.	6.65821	0.0144402	1	0
chr15	21290414	21290414	LOC646214	2.09223	0.00546081	0.407486	0.0879078
chr15	21324829	21324829	.	-6.65821	0.00323659	0	1
chr15	21366395	21366395	.	-6.65821	0.00323659	0	1
chr15	22431111	22431111	GOLGA8EP	6.65821	0.00323659	1	0
chr15	23319427	23319427	GOLGA6L22	6.65821	0.0144402	1	0
chr15	25623965	25623965	.	2.86302	0.0224634	0.380269	0.0436428
chr15	28517582	28517582	.	6.65821	0.000666966	1	0
chr15	30135275	30135275	GOLGA8T,LOC102725021	6.65821	0.0144402	1	0
chr15	30381549	30381549	CHRFAM7A	6.65821	0.0144402	1	0
chr15	31780257	31780257	LOC100288637,OTUD7A	-0.104209	0.0367221	0.863909	0.929369
chr15	36063071	36063071	.	0.190169	0.0148641	0.970067	0.849032
chr15	37925956	37925956	.	-2.35824	0.0144402	0.0617833	0.358065
chr15	41383162	41383162	.	6.65821	0.0144402	1	0
chr15	42147281	42147281	PLA2G4F	0.0917618	0.00289728	0.980361	0.919331
chr15	54930861	54930861	.	6.65821	0.00454352	1	0
chr15	56998973	56998973	TCF12	0.0664495	0.0110455	0.993137	0.947981
chr15	57278798	57278798	TCF12	-4.18691	0.00252425	0.0454545	1
chr15	65517829	65517829	.	-1.94394	0.0209955	0	0.0284754
chr15	67765959	67765959	MAP2K5	-0.0689467	0.0262631	0.940389	0.986911
chr15	73539313	73539313	REC114	1.56443	0.0247174	0.649255	0.212902
chr15	73543824	73543824	REC114	1.36827	0.040651	0.616144	0.23254
chr15	73552843	73552843	REC114	1.45676	0.0323863	0.601627	0.212822
chr15	74097705	74097705	COMMD4P2	6.65821	0.000120821	1	0
chr15	77830675	77830675	.	-0.0954597	0.0486384	0.866009	0.925933
chr15	80272961	80272961	LINC00927	-0.136129	0.00454352	0.797529	0.877436
chr15	82946502	82946502	HOMER2	0.0517147	0.0156372	0.974293	0.939635
chr15	84168573	84168573	DNM1P41	6.65821	0.0144402	1	0
chr15	84493238	84493238	GOLGA6L4	6.65821	0.000666966	1	0
chr15	85065405	85065405	PDE8A	0.0620098	0.0400468	0.996212	0.953879
chr15	85240858	85240858	GOLGA6L3	6.65821	0.0144402	1	0
chr15	96333227	96333227	NR2F2	1.49122	0.0144402	0.0930801	0.0266667
chr15	97323595	97323595	.	-0.0824393	0.00570246	0.904937	0.958741
chr15	101934535	101934535	.	2.51525	0.00235655	1	0.166667
chr16	1232414	1232414	.	6.65821	0.0262631	1	0
chr16	1669431	1669431	CRAMP1	0.062599	0.00709433	0.987404	0.945052
chr16	1976633	1976633	TBL3	0.470093	0.0180046	0.970464	0.697814
chr16	2543290	2543290	PDPK1	6.65821	0.0144402	1	0
chr16	2572764	2572764	PDPK1	6.65821	0.0144402	1	0
chr16	2654150	2654150	.	0.985786	0.00593954	1	0.5
chr16	7218076	7218076	RBFOX1	0.994623	0.0250906	0.815325	0.404203
chr16	7221058	7221058	RBFOX1	0.995078	0.0228715	0.735502	0.364025
chr16	11254394	11254394	.	-0.211993	0.00323659	0.803275	0.932006
chr16	11254916	11254916	SOCS1	1.30493	0.019153	0.126833	0.0453816
chr16	14690107	14690107	PLA2G10	6.65821	8.42046e-07	1	0
chr16	14754456	14754456	NPIPA2,NPIPA3	6.65821	0.0144402	1	0
chr16	14754543	14754543	NPIPA2,NPIPA3	6.65821	0.00323659	1	0
chr16	16335918	16335918	PKD1P1,PKD1P4-NPIPA8	6.65821	0.0144402	1	0
chr16	18334098	18334098	NPIPA8,PKD1P4-NPIPA8	6.65821	7.2432e-08	1	0
chr16	18334143	18334143	NPIPA8,PKD1P4-NPIPA8	6.65821	0.00323659	1	0
chr16	18383237	18383237	PKD1P5-LOC105376752	0.217381	0.04829	0.977391	0.839281
chr16	18396259	18396259	PKD1P5-LOC105376752	0.985786	0.0433118	1	0.5
chr16	18626957	18626957	.	0.985786	2.81266e-06	1	0.5
chr16	21417688	21417688	NPIPB3	6.65821	0.0144402	1	0
chr16	21430721	21430721	.	6.65821	0.00323659	1	0
chr16	21496888	21496888	SMG1P3	6.65821	0.000120821	1	0
chr16	22410805	22410805	.	0.105729	0.00454352	0.997685	0.926477
chr16	23012850	23012850	.	2.03125	0.0409305	0.303382	0.0666667
chr16	28408861	28408861	EIF3C	6.65821	0.0144402	1	0
chr16	28690321	28690321	EIF3C	6.65821	0.00323659	1	0
chr16	28735141	28735141	EIF3C,EIF3CL	6.65821	0.00323659	1	0
chr16	29549026	29549026	SMG1P2	6.65821	3.80778e-08	1	0
chr16	30191796	30191796	.	6.65821	0.00323659	1	0
chr16	30256163	30256163	.	6.65821	0.00323659	1	0
chr16	32343644	32343644	.	6.65821	2.21743e-05	1	0
chr16	32348983	32348983	.	1.92335	0.00516139	0.97619	0.25
chr16	32675617	32675617	LOC102723655,TP53TG3,TP53TG3B,TP53TG3C,TP53TG3E,TP53TG3F	6.65821	0.000401919	1	0
chr16	33144304	33144304	.	6.65821	2.21743e-05	1	0
chr16	33144313	33144313	.	6.65821	4.59714e-06	1	0
chr16	33549915	33549915	.	-6.65821	0.00323659	0	1
chr16	33707056	33707056	.	0.143349	0.00323659	0.977822	0.884389
chr16	33771041	33771041	ENPP7P13	0.428817	0.0491189	0.949016	0.702425
chr16	33816705	33816705	.	6.65821	0.0144402	1	0
chr16	33816710	33816710	.	6.65821	0.0144402	1	0
chr16	34356487	34356487	CCNYL3	6.65821	0.00323659	1	0
chr16	34377196	34377196	CCNYL3	6.65821	0.00323659	1	0
chr16	34388935	34388935	.	6.65821	0.0144402	1	0
chr16	34456508	34456508	.	6.65821	0.00011331	1	0
chr16	34514578	34514578	.	6.65821	0.000666966	1	0
chr16	34975935	34975935	.	2.51525	0.00548322	1	0.166667
chr16	34978068	34978068	.	-6.65821	0.0262631	0	1
chr16	34983803	34983803	.	6.65821	0.000666966	1	0
chr16	35022250	35022250	.	6.65821	0.000668116	1	0
chr16	36355262	36355262	.	6.65821	0.00323659	1	0
chr16	36484875	36484875	.	1.55667	0.0452412	1	0.333333
chr16	36516692	36516692	.	-0.367779	0.018397	0.648789	0.840078
chr16	37041379	37041379	.	6.65821	0.0144402	1	0
chr16	37171192	37171192	.	6.65821	0.000120821	1	0
chr16	37412998	37412998	.	6.65821	2.21743e-05	1	0
chr16	37724329	37724329	.	6.65821	0.0144402	1	0
chr16	38201396	38201396	.	6.65821	0.0211048	1	0
chr16	38227573	38227573	.	6.65821	2.21743e-05	1	0
chr16	49818076	49818076	ZNF423	-0.0838823	0.0393126	0.889352	0.943193
chr16	57776178	57776178	KIFC3	-2.16674	0.0385385	0.111914	0.537402
chr16	57789052	57789052	KIFC3	0.770275	0.0472754	0.929929	0.541085
chr16	58396494	58396494	GINS3	6.65821	0.000666966	1	0
chr16	60638017	60638017	.	-4.69419	0.00323659	0	0.248877
chr16	60647281	60647281	.	-4.92748	0.0112206	0	0.294312
chr16	60664794	60664794	.	-4.43954	0.00323659	0	0.206987
chr16	67485591	67485591	.	-0.135062	0.0445538	0.880761	0.96818
chr16	69374540	69374540	TERF2	0.0960091	0.0328445	0.988201	0.923934
chr16	70983094	70983094	HYDIN	1.95777	0.0148193	1	0.25
chr16	74322025	74322025	.	0.0881992	0.000596154	0.998264	0.93847
chr16	81094146	81094146	GCSH	-4.12453	0.021583	0	0.164425
chr16	81844282	81844282	PLCG2	0.112802	0.0287351	0.998227	0.922399
chr16	82482367	82482367	.	-1.13794	0.0414963	0.357859	0.799533
chr16	83848629	83848629	.	-2.42525	0.00586442	0.078085	0.463125
chr16	86954093	86954093	.	1.27547	0.0236896	0.215221	0.0830366
chr16	86967207	86967207	.	-1.29108	0.0400468	0.316493	0.788967
chr16	87237222	87237222	.	-2.5909	0.0144402	0.00618132	0.0874883
chr16	89717784	89717784	VPS9D1,VPS9D1-AS1	0.116636	0.0472655	0.982323	0.905255
chr17	63210	63210	.	6.65821	0.000120821	1	0
chr17	78122	78122	.	6.65821	0.0144402	1	0
chr17	1020144	1020144	ABR	0.060299	0.0120314	0.988865	0.947977
chr17	3939701	3939701	ATP2A3	0.0979443	0.0275243	0.99566	0.929652
chr17	5339781	5339781	RABEP1	0.0869973	0.0203426	1	0.940895
chr17	10147355	10147355	GAS7	-0.162603	0.0347013	0.807971	0.90556
chr17	10233702	10233702	.	1.65463	0.0184556	0.524595	0.159798
chr17	11469627	11469627	SHISA6	1.24488	0.0307172	0.567464	0.233657
chr17	11470054	11470054	SHISA6	1.31738	0.0417478	0.733289	0.288253
chr17	11513904	11513904	SHISA6	2.77942	0.0433118	0.473099	0.0603632
chr17	18464663	18464663	.	0.751607	0.0260169	0.953378	0.56219
chr17	18556677	18556677	CCDC144B	1.24397	0.046282	0.839985	0.348872
chr17	19066083	19066083	.	6.65821	0.00323659	1	0
chr17	19186465	19186465	.	-6.65821	0.00323659	0	1
chr17	19198712	19198712	.	0.985786	0.0433118	1	0.5
chr17	19230552	19230552	.	6.65821	0.0144402	1	0
chr17	19627793	19627793	.	6.65821	0.0144402	1	0
chr17	20984288	20984288	.	6.65821	0.00454352	1	0
chr17	23303969	23303969	.	-6.65821	0.0262631	0	1
chr17	23390754	23390754	.	6.65821	8.42046e-07	1	0
chr17	23397475	23397475	.	-6.65821	0.00011331	0	1
chr17	23397735	23397735	.	6.65821	0.0144402	1	0
chr17	23411328	23411328	.	6.65821	1.72795e-05	1	0
chr17	23446108	23446108	.	6.65821	0.0144402	1	0
chr17	23446112	23446112	.	6.65821	0.0144402	1	0
chr17	23610323	23610323	.	6.58496	0.042222	0.95	0
chr17	23728726	23728726	.	6.65821	0.0144402	1	0
chr17	23819839	23819839	.	6.65821	6.35966e-09	1	0
chr17	23962412	23962412	.	6.65821	0.0262631	1	0
chr17	24048423	24048423	.	-6.65821	0.0144402	0	1
chr17	24075327	24075327	.	-6.65821	0.0144402	0	1
chr17	24075337	24075337	.	-6.65821	0.0144402	0	1
chr17	24112013	24112013	.	-6.65821	0.000120821	0	1
chr17	24133850	24133850	.	6.65821	0.000666966	1	0
chr17	24151059	24151059	.	-5.52356	0.0111868	0	0.45
chr17	24151650	24151650	.	6.65821	4.59714e-06	1	0
chr17	24185250	24185250	.	6.65821	0.000666966	1	0
chr17	24240240	24240240	.	6.65821	0.0144402	1	0
chr17	24245487	24245487	.	6.65821	0.00323659	1	0
chr17	24249399	24249399	.	6.65821	0.0144402	1	0
chr17	24329921	24329921	.	-6.65821	0.000666966	0	1
chr17	24331191	24331191	.	6.65821	0.0144402	1	0
chr17	24331195	24331195	.	6.65821	0.0144402	1	0
chr17	24460247	24460247	.	6.65821	0.00323659	1	0
chr17	24481132	24481132	.	6.65821	0.0144402	1	0
chr17	24584753	24584753	.	6.65821	0.000666966	1	0
chr17	24666701	24666701	.	6.65821	0.000668116	1	0
chr17	24748035	24748035	.	-6.65821	0.00323659	0	1
chr17	24750660	24750660	.	6.65821	0.0262631	1	0
chr17	24780171	24780171	.	6.65821	0.0144402	1	0
chr17	24821569	24821569	.	0.985786	3.98666e-05	1	0.5
chr17	24823434	24823434	.	6.65821	0.00454352	1	0
chr17	24823438	24823438	.	6.65821	0.00454352	1	0
chr17	24874661	24874661	.	6.65821	0.0144402	1	0
chr17	24890433	24890433	.	-6.65821	0.00323659	0	1
chr17	25018530	25018530	.	-6.65821	0.00323659	0	1
chr17	25029665	25029665	.	-6.65821	0.000401919	0	1
chr17	25053065	25053065	.	6.65821	1.59113e-07	1	0
chr17	25086668	25086668	.	6.65821	0.000120821	1	0
chr17	25130962	25130962	.	6.65821	1.72795e-05	1	0
chr17	25139262	25139262	.	6.65821	0.000666966	1	0
chr17	25409892	25409892	.	6.65821	0.0144402	1	0
chr17	25421911	25421911	.	6.65821	0.0211048	1	0
chr17	25565989	25565989	.	6.65821	0.0144402	1	0
chr17	25589349	25589349	.	6.65821	0.0262631	1	0
chr17	25651714	25651714	.	-6.65821	0.00011331	0	1
chr17	25734512	25734512	.	6.65821	0.000668116	1	0
chr17	25736185	25736185	.	6.63248	0.0262631	0.982143	0
chr17	25763140	25763140	.	-6.65821	0.000668116	0	1
chr17	25799313	25799313	.	6.65821	0.00323659	1	0
chr17	25824424	25824424	.	6.65821	0.0144402	1	0
chr17	25849597	25849597	.	-6.65821	0.0262631	0	1
chr17	25860754	25860754	.	0.410284	0.0134118	1	0.75
chr17	25861173	25861173	.	-6.65821	0.000666966	0	1
chr17	25902489	25902489	.	6.65821	0.00454352	1	0
chr17	25979582	25979582	.	6.65821	0.0262631	1	0
chr17	26042018	26042018	.	6.65821	0.00454352	1	0
chr17	26117354	26117354	.	6.65821	1.03757e-09	1	0
chr17	26159076	26159076	.	6.65821	0.00323659	1	0
chr17	26196863	26196863	.	6.65821	3.5798e-06	1	0
chr17	26246815	26246815	.	6.65821	0.00323659	1	0
chr17	26263440	26263440	.	6.65821	0.0144402	1	0
chr17	26278032	26278032	.	6.65821	0.000120821	1	0
chr17	26340500	26340500	.	6.65821	0.000666966	1	0
chr17	26455766	26455766	.	-6.65821	0.0262631	0	1
chr17	26470519	26470519	.	6.65821	0.000666966	1	0
chr17	26553193	26553193	.	6.65821	7.2432e-08	1	0
chr17	26593160	26593160	.	-6.65821	0.0262631	0	1
chr17	28130256	28130256	NLK	-4.22345	0.0144402	0.000833333	0.192371
chr17	30219896	30219896	SLC6A4	1.41402	0.000295687	0.69431	0.254303
chr17	30224646	30224646	SLC6A4	1.48367	0.00719667	0.657864	0.228814
chr17	30226470	30226470	SLC6A4	1.33742	0.0212276	0.719276	0.278595
chr17	34077556	34077556	ASIC2	0.535015	0.0491189	0.170489	0.114565
chr17	38029229	38029229	TBC1D3C	-4.22431	0.0459596	0	0.176915
chr17	38234740	38234740	LOC101929950,NPEPPSP1	-6.65821	0.0262631	0	1
chr17	38631662	38631662	.	6.65821	2.21743e-05	1	0
chr17	43235398	43235398	.	-6.65821	3.43636e-07	0	1
chr17	43238690	43238690	.	6.65821	0.0144402	1	0
chr17	43248373	43248373	.	6.65821	0.000120821	1	0
chr17	43975953	43975953	PYY	0.985786	0.000668116	1	0.5
chr17	44180979	44180979	ASB16-AS1	6.65821	2.84916e-08	1	0
chr17	44513369	44513369	.	0.0766987	0.0198861	1	0.947707
chr17	46471621	46471621	.	6.65821	0.0144402	1	0
chr17	50345713	50345713	.	-1.82943	0.0206465	0	0.0255396
chr17	51134620	51134620	.	0.065111	0.0112206	0.988393	0.944336
chr17	51716713	51716713	CA10	1.65746	0.00223113	0.494123	0.149805
chr17	61395918	61395918	TBX2-AS1	1.34536	0.0144402	0.177187	0.0636684
chr17	62140567	62140567	.	0.114676	0.0126169	0.975641	0.900328
chr17	64073271	64073271	ERN1	0.0780461	0.00473206	0.998106	0.945019
chr17	68026839	68026839	.	-0.121881	0.037677	0.849519	0.925288
chr17	71283920	71283920	.	-0.138991	0.0240325	0.84852	0.935345
chr17	72551322	72551322	LINC00673	2.77215	0.011622	0.426982	0.0539683
chr17	72567333	72567333	LINC00673	1.93828	0.00011046	0.691047	0.172923
chr17	72567918	72567918	LINC00673	2.37375	0.00416454	0.450176	0.0787879
chr17	72568281	72568281	LINC00673	2.22916	0.024971	0.546518	0.108696
chr17	72571230	72571230	LINC00673	1.20371	0.0461735	0.851181	0.363889
chr17	72571519	72571519	LINC00673	1.03631	0.00893961	0.722832	0.347309
chr17	77973008	77973008	.	0.0342644	0.0298548	0.998236	0.974573
chr17	78255916	78255916	.	0.803813	0.0301704	0.648799	0.367382
chr17	78994121	78994121	CANT1	-0.413864	0.0179495	0.745336	0.996296
chr17	81455225	81455225	BAHCC1	1.04262	0.0144402	0.61912	0.295403
chr17	82750919	82750919	FN3K	-6.24793	0.00719667	0	0.75
chr18	23030	23030	.	0.280244	0.0459237	0.95228	0.782391
chr18	2451449	2451449	.	0.728428	0.0166349	0.861791	0.516179
chr18	10178214	10178214	.	-2.24905	0.0199383	0.0569301	0.308167
chr18	12707247	12707247	PSMG2	-0.486695	0.042114	0.701215	0.986576
chr18	13453219	13453219	LDLRAD4	-2.82887	0.000151225	0.0468507	0.393934
chr18	13980002	13980002	.	6.65821	0.0144402	1	0
chr18	16682721	16682721	.	0.669527	0.0244002	1	0.625
chr18	17844661	17844661	.	6.65821	0.0144402	1	0
chr18	18130081	18130081	.	6.65821	2.84916e-08	1	0
chr18	18161444	18161444	.	1.95777	0.0483432	1	0.25
chr18	18305783	18305783	.	6.65821	1.72795e-05	1	0
chr18	18408623	18408623	.	1.55667	0.00323659	1	0.333333
chr18	18632490	18632490	.	6.65821	0.0144402	1	0
chr18	18794685	18794685	.	6.65821	0.0144402	1	0
chr18	18975430	18975430	.	6.65821	0.0262631	1	0
chr18	19075208	19075208	.	6.65821	0.000668116	1	0
chr18	19156071	19156071	.	6.65821	0.0144402	1	0
chr18	19368568	19368568	.	0.577838	0.0236896	1	0.666667
chr18	19520357	19520357	.	6.65821	0.0262631	1	0
chr18	19681843	19681843	.	6.65821	2.21743e-05	1	0
chr18	19871421	19871421	.	1.95777	0.00323659	1	0.25
chr18	20337972	20337972	.	6.65821	9.7718e-09	1	0
chr18	20448281	20448281	.	6.65821	1.51236e-13	1	0
chr18	20614271	20614271	.	6.65821	0.0144402	1	0
chr18	20636321	20636321	.	6.65821	0.0262631	1	0
chr18	44876687	44876687	SETBP1	3.11848	0.0017811	0.620738	0.0626263
chr18	45587397	45587397	SLC14A2	-0.0691455	0.0277859	0.918913	0.964518
chr18	46202781	46202781	C18orf25	0.256815	0.0144402	0.964931	0.805952
chr18	54648148	54648148	.	-0.164957	0.00355001	0.833962	0.936193
chr18	55932601	55932601	.	-0.0928581	0.0337691	0.883522	0.942924
chr18	56538129	56538129	.	-1.53399	0.0329279	0.211209	0.630589
chr18	58174371	58174371	NEDD4L	-0.106647	0.0398245	0.89982	0.969624
chr18	58920008	58920008	ZNF532	-0.0822066	0.0266839	0.904043	0.957638
chr18	59992243	59992243	.	-0.134777	0.0433118	0.893204	0.981648
chr18	61747724	61747724	.	-0.104543	0.0148641	0.899199	0.967529
chr18	64760586	64760586	.	-2.95258	0.000144155	0.0689774	0.601388
chr18	66073906	66073906	.	0.949176	0.0100661	0.551664	0.280902
chr18	67906717	67906717	.	0.789929	0.0156074	0.889965	0.510515
chr18	73958747	73958747	.	1.064	0.000445849	0.599163	0.281365
chr18	78666142	78666142	.	0.0642394	0.0459567	0.988302	0.944826
chr18	79911953	79911953	SLC66A2	6.65821	0.000666966	1	0
chr19	1628254	1628254	TCF3	6.65821	0.000666966	1	0
chr19	2994273	2994273	TLE6	-0.10981	0.0139416	0.897438	0.969204
chr19	6940177	6940177	ADGRE1	-1.16686	0.0157819	0.345086	0.787247
chr19	8774957	8774957	.	-0.0772151	0.0262259	0.91969	0.970804
chr19	9958907	9958907	.	-0.136503	0.029756	0.808125	0.889313
chr19	10272296	10272296	ICAM1	-0.238821	0.0167252	0.809521	0.957058
chr19	10294257	10294257	ICAM5	0.954108	0.0063696	0.49187	0.249046
chr19	10515020	10515020	S1PR5	0.925603	0.0387822	0.185553	0.0929511
chr19	13729756	13729756	.	-1.61718	0.0288917	0.221086	0.698913
chr19	14108600	14108600	PRKACA	0.469114	0.00401836	0.938135	0.67494
chr19	14226894	14226894	.	0.102522	0.00323659	0.969631	0.902432
chr19	18139355	18139355	MAST3	-2.62199	0.0316154	0.0283358	0.225994
chr19	20149663	20149663	.	6.65821	0.00454352	1	0
chr19	20149920	20149920	.	6.65821	0.0144402	1	0
chr19	22647079	22647079	ZNF492	-0.226448	0.00593954	0.827133	0.969405
chr19	28425425	28425425	.	1.07816	0.0434913	0.42074	0.194013
chr19	32605576	32605576	ANKRD27	0.0462228	0.0144402	0.99323	0.961597
chr19	35395515	35395515	.	0.935547	0.0248847	0.645896	0.332931
chr19	36296516	36296516	.	6.65821	0.000120821	1	0
chr19	37291729	37291729	.	6.65821	0.0144402	1	0
chr19	37291763	37291763	.	6.65821	0.0144402	1	0
chr19	39896199	39896199	FCGBP	0.102424	0.042007	0.995455	0.926548
chr19	40109535	40109535	.	6.65821	0.0144402	1	0
chr19	40945336	40945336	CYP2B7P	-2.94645	0.00711011	0.0821429	0.700282
chr19	43397678	43397678	TEX101	-1.12089	0.0318057	0.323301	0.714868
chr19	44378788	44378788	.	-0.27362	0.0444327	0.730778	0.88548
chr19	45728925	45728925	FBXO46	0.0661306	0.0285584	0.984751	0.940183
chr19	46580647	46580647	PPP5D1	-1.36928	0.0230558	0.233006	0.617786
chr19	46649632	46649632	DACT3	1.75407	0.0336951	0.256858	0.0691138
chr19	47337389	47337389	C5AR2	-0.115443	0.00483944	0.840449	0.911298
chr19	47935069	47935069	.	6.65821	0.00323659	1	0
chr19	48224943	48224943	CARD8	0.0759844	0.00621246	0.990401	0.939075
chr19	49023121	49023121	CGB3	0.985786	0.0433118	1	0.5
chr19	49023131	49023131	CGB3	0.985786	0.0433118	1	0.5
chr19	49023136	49023136	CGB3	0.985786	0.0433118	1	0.5
chr19	50103153	50103153	.	6.65821	0.000120821	1	0
chr19	50108460	50108460	.	6.65821	0.0144402	1	0
chr19	50111349	50111349	.	6.65821	0.000326595	1	0
chr19	50125461	50125461	.	6.65821	0.000668116	1	0
chr19	50499086	50499086	.	6.65821	1.59113e-07	1	0
chr19	55661392	55661392	U2AF2	6.65821	0.00011331	1	0
chr19	56065451	56065451	.	0.848031	0.0324486	0.936147	0.515625
chr19	56933599	56933599	.	1.12091	0.00172197	0.447689	0.200447
chr2	17908252	17908252	KCNS3	0.0803119	0.0481295	0.986118	0.932181
chr2	19904524	19904524	.	-0.106519	0.00403901	0.906815	0.977068
chr2	20490306	20490306	LOC107985856	-0.101816	0.02967	0.892722	0.958731
chr2	23123676	23123676	.	-1.45879	0.0078209	0.157215	0.449635
chr2	25115921	25115921	EFR3B	-0.0502753	0.0462397	0.900421	0.932707
chr2	27558034	27558034	.	6.65821	0.00323659	1	0
chr2	31837485	31837485	.	2.2048	0.0131237	0.118425	0.0178571
chr2	33471934	33471934	RASGRP3	-2.46993	0.0278857	0.071164	0.439664
chr2	46181201	46181201	PRKCE	-1.13245	0.0337346	0.371622	0.82663
chr2	47243793	47243793	EPCAM-DT	-1.26495	0.0211048	0.296154	0.725748
chr2	48556194	48556194	STON1,STON1-GTF2A1L	6.65821	0.0144402	1	0
chr2	48977494	48977494	FSHR	-1.52619	0.0355185	0.169099	0.505847
chr2	64310575	64310575	.	2.56884	0.0194655	0.423911	0.0631313
chr2	65583135	65583135	.	0.106224	0.0433118	0.951086	0.882865
chr2	67042837	67042837	.	1.519	0.0337629	0.529806	0.178353
chr2	67045987	67045987	.	1.32512	0.04829	0.398595	0.153076
chr2	67052827	67052827	.	1.87572	0.0383974	0.514998	0.133057
chr2	67063130	67063130	.	2.86424	0.0234388	0.435408	0.0511696
chr2	68530008	68530008	APLF	0.148838	0.0245907	0.983417	0.886039
chr2	69651781	69651781	ANXA4	0.157279	0.0046812	0.996528	0.892569
chr2	74061219	74061219	TET3	6.65821	6.88987e-07	1	0
chr2	76165499	76165499	.	-0.237384	0.0167996	0.783578	0.925512
chr2	84075743	84075743	.	-0.0595661	0.0298571	0.923218	0.962555
chr2	84819030	84819030	DNAH6	-0.0689429	0.00808056	0.911932	0.957058
chr2	87528818	87528818	.	0.0675137	0.041343	1	0.953824
chr2	88339696	88339696	.	-0.109008	0.0368768	0.814609	0.879329
chr2	89900064	89900064	.	6.65821	0.000120821	1	0
chr2	91403924	91403924	.	1.95777	0.00274872	1	0.25
chr2	92024018	92024018	.	6.65821	0.000666966	1	0
chr2	92114049	92114049	.	6.65821	0.0262631	1	0
chr2	92400451	92400451	.	-6.65821	0.0262631	0	1
chr2	92651698	92651698	.	6.65821	0.00323659	1	0
chr2	93295697	93295697	.	6.65821	5.25642e-06	1	0
chr2	93544450	93544450	.	6.581	0.00237323	0.947368	0
chr2	93586579	93586579	.	6.65821	0.000668116	1	0
chr2	93586588	93586588	.	6.65821	0.0262631	1	0
chr2	93738037	93738037	.	6.65821	0.00323659	1	0
chr2	93787107	93787107	.	6.65821	0.0262631	1	0
chr2	93808745	93808745	.	6.65821	0.0144402	1	0
chr2	93921271	93921271	.	6.65821	0.00454352	1	0
chr2	94010752	94010752	.	6.65821	0.0144402	1	0
chr2	94037222	94037222	.	6.65821	0.000666966	1	0
chr2	94037231	94037231	.	6.65821	0.00323659	1	0
chr2	95638860	95638860	.	6.65821	2.84916e-08	1	0
chr2	95789841	95789841	.	6.65821	0.0144402	1	0
chr2	97299571	97299571	.	6.65821	0.0144402	1	0
chr2	97602928	97602928	.	6.65821	0.0144402	1	0
chr2	100558674	100558674	.	-0.111621	0.0378183	0.906531	0.980258
chr2	105514860	105514860	.	1.32326	0.00963425	0.631378	0.246314
chr2	106263504	106263504	.	0.108389	0.0305522	0.992482	0.919925
chr2	108466617	108466617	GCC2	0.0610876	0.0310909	0.998106	0.956311
chr2	109888141	109888141	.	6.65821	2.27438e-06	1	0
chr2	110315320	110315320	.	6.65821	2.21743e-05	1	0
chr2	110337521	110337521	.	6.65821	0.0144402	1	0
chr2	110443654	110443654	LIMS3-LOC440895	6.65821	4.59714e-06	1	0
chr2	110523201	110523201	RGPD5,RGPD6,RGPD8	6.65821	0.0144402	1	0
chr2	113394596	113394596	.	2.51525	0.00548322	1	0.166667
chr2	121840958	121840958	.	0.0652462	0.0486384	0.987864	0.94374
chr2	126918477	126918477	.	6.61389	0.00711332	0.969444	0
chr2	128380100	128380100	.	-0.0811167	0.0277419	0.935645	0.990338
chr2	129996103	129996103	.	2.54441	0.0316154	0.515018	0.0799973
chr2	130022271	130022271	.	1.84446	0.0395302	0.525004	0.138977
chr2	130027010	130027010	FAR2P1	2.30187	0.0144402	0.505506	0.0945443
chr2	130035484	130035484	FAR2P1	2.26068	0.0433118	0.328923	0.0607245
chr2	130054822	130054822	.	1.809	0.03747	0.63013	0.172685
chr2	130065480	130065480	.	1.97067	0.00697855	0.621795	0.151192
chr2	130068004	130068004	.	1.79872	0.029301	0.54988	0.150926
chr2	130074468	130074468	POTEF	1.74149	0.0480281	0.616123	0.177249
chr2	130102738	130102738	POTEF	2.05321	0.0224802	0.40308	0.0895302
chr2	130112160	130112160	POTEF	1.74079	0.0103665	0.519499	0.148429
chr2	130609038	130609038	.	-6.65821	0.000120821	0	1
chr2	135176400	135176400	.	0.0458139	0.0477951	0.995853	0.964413
chr2	137487824	137487824	THSD7B	6.65821	0.0144402	1	0
chr2	143576509	143576509	ARHGAP15	-1.36653	0.047358	0.235789	0.623767
chr2	154593512	154593512	.	0.652446	0.0199383	0.531938	0.334781
chr2	157555263	157555263	ACVR1C	0.788694	0.0403553	0.840625	0.4824
chr2	169083134	169083134	DHRS9	0.81383	0.0252764	0.118846	0.0632965
chr2	169755364	169755364	.	1.11433	0.037677	0.810655	0.369065
chr2	169786507	169786507	.	6.65821	0.0144402	1	0
chr2	181495391	181495391	ITGA4	-0.061846	0.0275243	0.950197	0.992254
chr2	182900202	182900202	.	-3.10509	0.0432922	0.0333645	0.363129
chr2	183385305	183385305	.	6.65821	0.00454352	1	0
chr2	186101390	186101390	.	-0.0961505	0.00193845	0.909461	0.972828
chr2	187351254	187351254	CALCRL	6.65821	1.59113e-07	1	0
chr2	191300594	191300594	MYO1B	1.75316	0.0470718	0.644841	0.184259
chr2	191316951	191316951	MYO1B	1.35133	0.0483432	0.704598	0.270072
chr2	191347657	191347657	MYO1B	1.24353	0.0283143	0.619544	0.255881
chr2	191350469	191350469	MYO1B	1.3763	0.0337236	0.725283	0.273234
chr2	197141195	197141195	ANKRD44	-0.0733945	0.0368144	0.933304	0.982534
chr2	206488247	206488247	ADAM23	-0.106559	0.0273962	0.875288	0.943152
chr2	207610563	207610563	METTL21A	6.65821	0.000668116	1	0
chr2	208285341	208285341	PIKFYVE	0.076985	0.00199986	0.991455	0.939417
chr2	208884187	208884187	.	0.643838	0.0144402	0.610647	0.387219
chr2	209209203	209209203	.	-0.368663	0.0133875	0.735979	0.953175
chr2	210949758	210949758	.	-0.142296	0.000908759	0.874298	0.965965
chr2	214807821	214807821	BARD1	-1.33013	0.049492	0.161181	0.420393
chr2	216226472	216226472	.	6.65821	0.0144402	1	0
chr2	216729802	216729802	.	1.89684	0.0360469	0.434476	0.109355
chr2	216808100	216808100	.	1.16579	0.00120642	0.551652	0.240339
chr2	216881421	216881421	.	1.11993	0.0448105	0.731935	0.331375
chr2	222822693	222822693	.	0.311201	0.038487	0.944988	0.759693
chr2	227342908	227342908	MFF	-2.27113	0.0369941	0.054886	0.303205
chr2	232381702	232381702	ALPP	1.90029	0.0360469	0.0854323	0.0155654
chr2	232381726	232381726	ALPP	2.31543	0.0144402	0.08962	0.0100139
chr2	232906379	232906379	NGEF	6.65821	0.00323659	1	0
chr2	232906383	232906383	NGEF	6.65821	0.0144402	1	0
chr2	236991423	236991423	.	-0.0863233	0.0440252	0.882924	0.937982
chr2	240110560	240110560	.	1.8243	0.0406856	0.511554	0.137276
chr2	240111828	240111828	.	2.34624	0.0103518	0.565658	0.103208
chr2	240112047	240112047	.	1.85144	0.0277645	0.562158	0.148554
chr2	240127842	240127842	COPS9	2.0995	0.000715992	0.54338	0.119125
chr20	12016083	12016083	.	1.19841	0.00323659	0.825765	0.354189
chr20	12805808	12805808	.	6.65821	0.00323659	1	0
chr20	26052182	26052182	.	0.577838	1.97941e-05	1	0.666667
chr20	26649604	26649604	.	6.65821	3.80778e-08	1	0
chr20	26745049	26745049	.	6.59178	0.00252425	0.954545	0
chr20	26786253	26786253	.	6.65821	0.000668116	1	0
chr20	27026251	27026251	.	6.65821	2.27438e-06	1	0
chr20	27313879	27313879	.	6.65821	0.00011331	1	0
chr20	27575371	27575371	.	6.65821	0.000666966	1	0
chr20	27954361	27954361	.	6.58496	0.042222	0.95	0
chr20	28061315	28061315	.	6.65821	0.0144402	1	0
chr20	28099908	28099908	.	6.65821	4.59714e-06	1	0
chr20	28425373	28425373	.	6.65821	0.0144402	1	0
chr20	29133254	29133254	.	-6.65821	0.0144402	0	1
chr20	29923870	29923870	.	0.3313	0.0194272	0.975225	0.773077
chr20	29927446	29927446	.	-6.65821	5.25642e-06	0	1
chr20	30565507	30565507	.	-0.408963	0.0207214	0.658924	0.878151
chr20	32177105	32177105	.	6.65821	0.0144402	1	0
chr20	34231002	34231002	ASIP	6.65821	0.00323659	1	0
chr20	34752077	34752077	NCOA6	0.0691801	0.0142138	0.98643	0.939777
chr20	35397388	35397388	UQCC1	0.0727608	0.0298548	0.996212	0.946723
chr20	36976553	36976553	.	6.65821	0.0144402	1	0
chr20	37000388	37000388	RBL1	6.65821	0.00323659	1	0
chr20	38213511	38213511	KIAA1755	-0.941391	0.0363959	0.388682	0.75562
chr20	40630637	40630637	.	1.9603	0.0490301	0.568245	0.138594
chr20	41551913	41551913	CHD6	-0.0996593	0.00521444	0.887841	0.952055
chr20	42219118	42219118	PTPRT	-0.450977	0.000758889	0.698173	0.958048
chr20	46233836	46233836	CDH22	-0.145091	0.0222583	0.839051	0.928881
chr20	46312482	46312482	.	-6.65821	2.84916e-08	0	1
chr20	47525862	47525862	NCOA3	0.985786	0.0433118	1	0.5
chr20	50494092	50494092	.	-0.142867	0.0451567	0.899478	0.994152
chr20	56775109	56775109	.	0.289797	0.0462237	0.941796	0.768586
chr20	62313407	62313407	LAMA5	0.0853866	0.0195143	0.991327	0.933783
chr20	62563789	62563789	.	1.03394	0.0195143	0.797399	0.384313
chr20	62564229	62564229	.	1.02728	0.0309756	0.763314	0.369414
chr20	62565346	62565346	.	1.13075	0.0459596	0.777184	0.349489
chr20	62573974	62573974	.	1.32288	0.00403901	0.59185	0.230581
chr20	62575945	62575945	.	1.19203	0.0215376	0.646592	0.277381
chr20	62576697	62576697	.	1.49689	0.0228939	0.629041	0.216422
chr21	5013249	5013249	.	6.65821	4.55267e-05	1	0
chr21	5043791	5043791	.	6.65821	0.00454352	1	0
chr21	5046759	5046759	.	-6.65821	0.0262631	0	1
chr21	5088313	5088313	.	6.65821	2.21743e-05	1	0
chr21	5756270	5756270	.	6.65821	0.0144402	1	0
chr21	5967208	5967208	.	6.65821	0.00323659	1	0
chr21	6026792	6026792	.	6.65821	0.00011331	1	0
chr21	6073736	6073736	LINC00313,LINC01669	6.65821	2.21743e-05	1	0
chr21	6091403	6091403	LINC00319	6.65821	2.84916e-08	1	0
chr21	6091408	6091408	LINC00319	6.65821	2.84916e-08	1	0
chr21	6097217	6097217	.	6.65821	0.00323659	1	0
chr21	6106256	6106256	.	6.65821	0.00323659	1	0
chr21	6112022	6112022	SIK1,SIK1B	-6.65821	0.000666966	0	1
chr21	6128581	6128581	.	6.65821	2.21743e-05	1	0
chr21	6151108	6151108	.	2.22055	0.0300679	0.96875	0.2
chr21	6154119	6154119	.	6.65821	0.0144402	1	0
chr21	6154141	6154141	.	6.65821	0.00323659	1	0
chr21	6156608	6156608	.	6.65821	0.0144402	1	0
chr21	6158727	6158727	.	6.65821	0.00323659	1	0
chr21	6158736	6158736	.	6.65821	0.0144402	1	0
chr21	6260989	6260989	LOC102724219,LOC102724843,LOC102724951	6.65821	2.21743e-05	1	0
chr21	6329761	6329761	.	6.65821	2.22975e-10	1	0
chr21	6455215	6455215	CBS,CBSL	0.577838	2.2761e-07	1	0.666667
chr21	6473316	6473316	.	6.6072	0.0483758	0.964912	0
chr21	6473319	6473319	.	6.63421	0.000862044	0.983333	0
chr21	6804467	6804467	.	6.65821	1.72795e-05	1	0
chr21	6856391	6856391	.	6.65821	2.21743e-05	1	0
chr21	6858465	6858465	LOC110091777	6.65821	0.0144402	1	0
chr21	7805561	7805561	.	-6.65821	0.00454352	0	1
chr21	8213729	8213729	LOC100507412,RNA45SN2	-6.65821	0.0262631	0	1
chr21	8237429	8237429	RNA28SN5	6.65821	0.0144402	1	0
chr21	8248105	8248105	RNA28SN5	6.65821	0.000120821	1	0
chr21	8253191	8253191	RNA28SN5	-6.65821	0.000666966	0	1
chr21	8467145	8467145	.	6.65821	0.00454352	1	0
chr21	8576207	8576207	.	6.65821	0.0262631	1	0
chr21	13590208	13590208	.	6.65821	0.0144402	1	0
chr21	16617312	16617312	MIR99AHG	-0.142375	0.029737	0.816836	0.902596
chr21	16767771	16767771	.	-0.0908478	0.0440075	0.879172	0.936965
chr21	18647617	18647617	MIR548XHG	0.992156	0.0155391	0.641157	0.317354
chr21	21081598	21081598	NCAM2	-4.25471	0.000323494	0.00160256	0.211488
chr21	26824759	26824759	.	-0.146495	0.0177801	0.854948	0.947391
chr21	29910783	29910783	GRIK1	-5.67243	8.40397e-06	0	0.5
chr21	33751315	33751315	ITSN1	-0.077465	0.0193508	0.936797	0.989024
chr21	34167611	34167611	.	1.50872	0.00267851	0.661897	0.22612
chr21	34216697	34216697	.	1.34664	0.00323659	0.710206	0.273189
chr21	35604735	35604735	.	-0.822619	0.0088917	0.524852	0.935947
chr21	35686241	35686241	.	2.67355	0.0379348	0.543269	0.0767196
chr21	36531414	36531414	CLDN14	-0.119042	0.00359485	0.867913	0.943425
chr21	43052796	43052796	.	6.65821	0.000666966	1	0
chr21	43387967	43387967	.	6.65821	0.000666966	1	0
chr21	43388126	43388126	.	6.65821	0.0211048	1	0
chr21	43389345	43389345	.	2.84254	0.00863456	0.958333	0.125
chr21	43416101	43416101	SIK1,SIK1B	0.985786	0.0433118	1	0.5
chr21	43418369	43418369	SIK1,SIK1B	6.65821	0.000120821	1	0
chr21	43448691	43448691	LINC00319	6.65821	0.00323659	1	0
chr21	43464619	43464619	LINC00313,LINC01669	6.65821	0.0144402	1	0
chr21	43465339	43465339	LINC00313,LINC01669	6.65821	0.0144402	1	0
chr21	43472740	43472740	LINC00313,LINC01669	6.65821	2.21743e-05	1	0
chr21	43481215	43481215	.	6.65821	2.21743e-05	1	0
chr21	43492903	43492903	.	6.65821	9.66876e-10	1	0
chr21	43504801	43504801	.	6.65821	0.000120821	1	0
chr21	44100396	44100396	TRAPPC10	6.65821	0.0144402	1	0
chr21	44126412	44126412	LOC102724159,PWP2	-6.65821	0.0262631	0	1
chr21	44135762	44135762	GATD3A,GATD3B	6.65821	0.0144402	1	0
chr21	44161219	44161219	.	-6.65821	0.00323659	0	1
chr21	44161804	44161804	.	6.65821	0.0144402	1	0
chr21	44165784	44165784	.	1.55667	0.0125411	1	0.333333
chr21	44825063	44825063	.	6.65821	0.0144402	1	0
chr21	46098026	46098026	.	-6.65821	0.0144402	0	1
chr21	46139855	46139855	FTCD	-0.331692	0.0281152	0.79255	1
chr21	46144997	46144997	FTCD	1.27055	0.0144402	0.648918	0.263122
chr21	46467878	46467878	DIP2A,DIP2A-IT1	-0.663724	0.0281152	0.568797	0.906912
chr22	10541367	10541367	.	-6.65821	0.0262631	0	1
chr22	10551410	10551410	.	6.65821	0.00454352	1	0
chr22	11222013	11222013	.	6.65821	0.0262631	1	0
chr22	11784282	11784282	.	6.65821	0.00323659	1	0
chr22	15561978	15561978	.	6.65821	0.000120821	1	0
chr22	15642773	15642773	.	0.985786	0.00231365	1	0.5
chr22	16350601	16350601	.	-6.65821	0.00454352	0	1
chr22	16520398	16520398	.	-6.65821	2.21743e-05	0	1
chr22	18197361	18197361	FAM230D	1.55667	0.00610601	1	0.333333
chr22	18348761	18348761	.	-6.65821	0.000668116	0	1
chr22	18379963	18379963	FAM230J	6.65821	0.0144402	1	0
chr22	18409785	18409785	.	6.65821	0.0262631	1	0
chr22	18714887	18714887	.	0.240489	0.00501092	0.968489	0.81825
chr22	18750204	18750204	FAM230E	6.65821	0.0144402	1	0
chr22	18849457	18849457	.	-6.65821	0.0211048	0	1
chr22	18915304	18915304	LOC102724788,PRODH	0.358495	0.000229739	1	0.777778
chr22	19546133	19546133	.	-0.064547	0.0144972	0.924692	0.96746
chr22	21307723	21307723	FAM230H	6.65821	0.000120821	1	0
chr22	21506382	21506382	PI4KAP2	0.985786	0.00593954	1	0.5
chr22	21549769	21549769	RIMBP3B,RIMBP3C,UBE2L3	-6.65821	2.21743e-05	0	1
chr22	21549772	21549772	RIMBP3B,RIMBP3C,UBE2L3	-6.65821	2.21743e-05	0	1
chr22	21549808	21549808	RIMBP3B,RIMBP3C,UBE2L3	-6.65821	0.00323659	0	1
chr22	21549811	21549811	RIMBP3B,RIMBP3C,UBE2L3	-6.65821	0.00323659	0	1
chr22	21554151	21554151	UBE2L3	6.65821	3.0658e-16	1	0
chr22	22925181	22925181	.	-0.129554	0.0144402	0.833705	0.912976
chr22	26470006	26470006	HPS4	1.00297	0.0388943	0.52042	0.254664
chr22	32427168	32427168	BPIFC	-0.413341	0.0198637	0.700895	0.936745
chr22	32999450	32999450	SYN3	-0.114008	0.0291748	0.896801	0.971368
chr22	38143812	38143812	PLA2G6	-0.0874617	0.00014251	0.916051	0.973928
chr22	39679336	39679336	CACNA1I	0.166547	0.0231419	0.986863	0.878178
chr22	40537350	40537350	MRTFA	6.65821	0.00454352	1	0
chr22	40537837	40537837	MRTFA	6.65821	0.0144402	1	0
chr22	40537868	40537868	MRTFA	6.65821	2.21743e-05	1	0
chr22	45695596	45695596	ATXN10	0.0537767	0.00501092	0.995436	0.958648
chr22	47013905	47013905	TBC1D22A	0.0777903	0.00676574	0.98982	0.937337
chr22	47926091	47926091	.	-0.0831339	0.0294658	0.892911	0.946468
chr22	48883281	48883281	LINC01310	-1.67296	0.0316154	0.180197	0.596476
chr3	3753573	3753573	LOC100130207	5.13869	0.0481575	0.34229	0
chr3	3831581	3831581	LRRN1	6.65821	0.00011331	1	0
chr3	13886194	13886194	.	1.11854	0.0263075	0.820498	0.372495
chr3	13888258	13888258	.	1.09826	0.00650833	0.783204	0.360489
chr3	13987448	13987448	TPRXL	-1.62254	0.0454839	0.211557	0.672213
chr3	14158386	14158386	XPC	-0.877194	0.000489064	0.471142	0.873762
chr3	33169467	33169467	SUSD5	0.099046	0.0211048	0.985203	0.919171
chr3	34532963	34532963	.	0.805279	0.0481868	0.503608	0.283913
chr3	37233322	37233322	.	0.0699442	0.0371409	0.996528	0.948894
chr3	42796881	42796881	HIGD1A	-5.10154	0.0300617	0	0.333333
chr3	42796949	42796949	HIGD1A	6.65821	0.000668116	1	0
chr3	46956939	46956939	CCDC12	0.0469746	0.0302979	0.998512	0.966203
chr3	52745308	52745308	NEK4	0.0683141	0.0433118	0.990488	0.944217
chr3	55428544	55428544	.	1.16914	0.00323659	0.715268	0.312516
chr3	55505531	55505531	.	1.16714	0.0440252	0.554642	0.241437
chr3	56436000	56436000	ERC2	-1.82769	0.0144402	0.123736	0.464719
chr3	65530710	65530710	MAGI1	6.65821	0.000120821	1	0
chr3	72463229	72463229	.	2.56924	0.0371623	0.466996	0.0703704
chr3	74243570	74243570	.	0.197261	0.0457335	0.972211	0.84669
chr3	74331415	74331415	CNTN3	1.77655	0.0360469	0.55563	0.155096
chr3	77766289	77766289	.	6.65821	0.00323659	1	0
chr3	78100904	78100904	.	-0.0964694	0.00642573	0.889019	0.951189
chr3	84715669	84715669	LINC00971	-0.261852	0.0410938	0.778053	0.934889
chr3	86141475	86141475	.	-0.140566	0.0291972	0.863582	0.952982
chr3	91722160	91722160	.	6.65821	0.000668116	1	0
chr3	91792923	91792923	.	0.286168	0.0371623	0.925293	0.757012
chr3	91851611	91851611	.	6.65821	2.21743e-05	1	0
chr3	91977887	91977887	.	6.65821	2.27438e-06	1	0
chr3	92149581	92149581	.	6.65821	0.000120821	1	0
chr3	92203825	92203825	.	6.65821	0.000666966	1	0
chr3	92203836	92203836	.	6.65821	0.00323659	1	0
chr3	92242519	92242519	.	6.65821	0.00454352	1	0
chr3	92266080	92266080	.	6.65821	2.21743e-05	1	0
chr3	92270698	92270698	.	6.60979	0.0327611	0.966667	0
chr3	92275613	92275613	.	6.65821	0.00323659	1	0
chr3	92328367	92328367	.	6.59743	0.000796776	0.958333	0
chr3	92332659	92332659	.	6.65821	0.000666966	1	0
chr3	92360203	92360203	.	0.985786	0.00231365	1	0.5
chr3	92464620	92464620	.	6.65821	0.000668116	1	0
chr3	92552632	92552632	.	6.65821	0.0144402	1	0
chr3	92710374	92710374	.	0.985786	0.0433118	1	0.5
chr3	92742236	92742236	.	6.65821	0.0144402	1	0
chr3	92743352	92743352	.	6.65821	0.0144402	1	0
chr3	92860070	92860070	.	6.65821	0.000401919	1	0
chr3	92894766	92894766	.	6.65821	0.000120821	1	0
chr3	92896977	92896977	.	6.65821	0.00323659	1	0
chr3	92976082	92976082	.	6.65821	2.21743e-05	1	0
chr3	92976097	92976097	.	6.65821	2.21743e-05	1	0
chr3	93060788	93060788	.	6.65821	0.0144402	1	0
chr3	93248540	93248540	.	6.65821	0.00011331	1	0
chr3	93295216	93295216	.	6.65821	0.000666966	1	0
chr3	93409091	93409091	.	2.12078	0.000666966	1	0.222222
chr3	93409495	93409495	.	6.65821	0.0144402	1	0
chr3	93414924	93414924	.	0.985786	0.000235445	1	0.5
chr3	93523397	93523397	.	6.65821	0.0144402	1	0
chr3	93553817	93553817	.	6.62611	0.019523	0.977778	0
chr3	93553826	93553826	.	6.65821	6.35966e-09	1	0
chr3	93581237	93581237	.	0.985786	0.0155861	1	0.5
chr3	93600786	93600786	.	6.65821	0.000666966	1	0
chr3	93600801	93600801	.	6.65821	0.000666966	1	0
chr3	96646750	96646750	.	0.187151	0.0243026	0.989352	0.867769
chr3	106074552	106074552	.	6.65821	0.000666966	1	0
chr3	107204009	107204009	LINC00882	-2.90225	0.0424926	0.0260721	0.259673
chr3	107649081	107649081	BBX	0.134887	0.0118476	0.98045	0.892044
chr3	109009823	109009823	MORC1	0.713585	0.029737	0.881542	0.533665
chr3	109123718	109123718	.	0.597171	0.00323659	0.918	0.603453
chr3	129339569	129339569	.	6.65821	0.000666966	1	0
chr3	130868533	130868533	ATP2C1	6.65821	0.00454352	1	0
chr3	134681312	134681312	.	1.6983	0.0471535	0.595867	0.176698
chr3	134682357	134682357	.	1.70116	0.0453028	0.61264	0.181486
chr3	139960200	139960200	CLSTN2	-0.109336	0.0226044	0.868782	0.93797
chr3	150666040	150666040	ERICH6	-0.107362	0.0144402	0.86	0.927214
chr3	150819937	150819937	.	6.65821	0.0144402	1	0
chr3	150820197	150820197	.	6.65821	0.0144402	1	0
chr3	151336326	151336326	MED12L	-0.340804	0.00951274	0.779068	0.989325
chr3	155505749	155505749	PLCH1	0.160151	0.0301533	0.955047	0.853651
chr3	164401942	164401942	.	0.903854	0.0342111	0.753691	0.39816
chr3	164423369	164423369	.	0.916631	0.0400033	0.620583	0.324048
chr3	171365277	171365277	TNIK	-4.90085	0.0104857	0	0.288747
chr3	172193174	172193174	FNDC3B	-6.65821	0.000668116	0	1
chr3	178205950	178205950	.	-0.0838232	0.0403044	0.918231	0.97376
chr3	181516440	181516440	SOX2-OT	-0.0997865	0.0482338	0.86587	0.928595
chr3	186927836	186927836	.	1.16407	0.0217206	0.743466	0.326235
chr3	188587199	188587199	LPP	6.65821	2.21743e-05	1	0
chr3	193871105	193871105	.	-2.38969	0.0414895	0.0440122	0.273047
chr3	194033180	194033180	LINC02028	1.1745	0.0050055	0.234689	0.0984065
chr3	194802728	194802728	.	-0.0844056	0.0358553	0.939694	0.996914
chr3	195767746	195767746	MUC4	6.65821	3.80778e-08	1	0
chr3	195783455	195783455	MUC4	2.25507	0.0472131	0.833333	0.166667
chr4	668876	668876	PDE6B	6.65821	0.0144402	1	0
chr4	1777034	1777034	.	0.0725786	0.0327684	0.997396	0.94797
chr4	3285986	3285986	.	0.775878	0.0444234	0.169199	0.0946581
chr4	3503451	3503451	.	-0.110441	0.00639719	0.867745	0.937576
chr4	3959471	3959471	.	-0.211974	0.0237816	0.777697	0.902368
chr4	5751522	5751522	EVC	-0.695664	0.00771012	0.572783	0.933892
chr4	6008283	6008283	C4orf50	1.61075	0.00323659	0.220293	0.0654042
chr4	9249604	9249604	USP17L11,USP17L18	6.65821	4.59714e-06	1	0
chr4	9267888	9267888	USP17L20,USP17L22	6.65821	0.000668116	1	0
chr4	9332137	9332137	.	6.65821	0.0144402	1	0
chr4	9339502	9339502	USP17L24,USP17L25,USP17L26,USP17L27,USP17L28,USP17L29,USP17L30,USP17L5	6.65821	2.21743e-05	1	0
chr4	9339544	9339544	USP17L24,USP17L25,USP17L26,USP17L27,USP17L28,USP17L29,USP17L30,USP17L5	6.65821	0.0144402	1	0
chr4	9348221	9348221	.	6.65821	0.00323659	1	0
chr4	11460816	11460816	.	-1.52369	0.0299352	0.257123	0.758047
chr4	15542921	15542921	CC2D2A	-0.175797	0.00208162	0.812924	0.919565
chr4	20589702	20589702	SLIT2	-0.157652	0.0143554	0.812952	0.907978
chr4	21850965	21850965	KCNIP4,KCNIP4-IT1	-0.154059	0.0144402	0.854394	0.951807
chr4	24504048	24504048	.	-0.149316	0.0342994	0.863344	0.958577
chr4	28106179	28106179	.	-6.65821	0.0144402	0	1
chr4	28499285	28499285	.	-0.130825	0.0154726	0.870412	0.95398
chr4	39572041	39572041	SMIM14,UGDH-AS1	0.0946354	0.0497778	0.981082	0.918158
chr4	41057407	41057407	APBB2	-0.976241	0.0271981	0.412263	0.820733
chr4	41113412	41113412	APBB2	2.8742	0.00454352	0.416342	0.0481481
chr4	49969447	49969447	.	6.65821	6.88987e-07	1	0
chr4	50564545	50564545	.	6.65821	2.27438e-06	1	0
chr4	50888043	50888043	.	6.65821	0.00323659	1	0
chr4	50916678	50916678	.	0.985786	0.00593954	1	0.5
chr4	51229030	51229030	.	6.65821	0.0144402	1	0
chr4	51513643	51513643	.	6.65821	2.21743e-05	1	0
chr4	51732521	51732521	.	1.95777	0.0337136	1	0.25
chr4	51798982	51798982	.	0.985786	0.00231365	1	0.5
chr4	53003105	53003105	SCFD2	1.22916	0.0278861	0.712578	0.298227
chr4	54244658	54244658	PDGFRA	0.652725	0.0339807	0.923112	0.583532
chr4	65762503	65762503	.	1.85655	0.016657	0.479609	0.125198
chr4	83187024	83187024	.	-6.65821	0.000120821	0	1
chr4	101749721	101749721	.	6.65821	0.000666966	1	0
chr4	108186851	108186851	.	1.47972	0.0336951	0.699448	0.244378
chr4	111864197	111864197	.	0.689671	0.0208397	0.733864	0.451192
chr4	111865243	111865243	.	0.834717	0.00306324	0.786133	0.436387
chr4	111868434	111868434	.	0.618717	0.0254899	0.537268	0.346408
chr4	111870415	111870415	.	0.672104	0.0249584	0.647756	0.402801
chr4	113445348	113445348	.	-0.107956	0.0271948	0.873624	0.942282
chr4	127165556	127165556	.	-0.154171	0.0492202	0.837104	0.932642
chr4	138547920	138547920	.	6.65821	0.0144402	1	0
chr4	145025552	145025552	ANAPC10	0.0356248	0.0415335	0.994759	0.970252
chr4	150030101	150030101	.	2.51525	0.0337629	1	0.166667
chr4	151477322	151477322	FAM160A1	-0.842675	0.0349	0.463652	0.839434
chr4	157178789	157178789	.	-0.186599	0.0216792	0.801292	0.913313
chr4	161950984	161950984	FSTL5	1.23671	0.00651222	0.718742	0.299233
chr4	161952745	161952745	FSTL5	1.29544	0.00361404	0.550682	0.218428
chr4	161959409	161959409	FSTL5	1.93911	2.21743e-05	0.558746	0.138316
chr4	180122241	180122241	.	-2.36849	0.01433	0.0581041	0.341689
chr4	182331823	182331823	TENM3	-2.67876	2.27438e-06	0.0899947	0.630271
chr4	183736672	183736672	.	6.65821	1.72795e-05	1	0
chr4	187679232	187679232	.	-1.72671	0.0306622	0.189839	0.651413
chr4	187679972	187679972	.	-1.8423	0.00186781	0.174799	0.652653
chr4	187684296	187684296	.	1.24118	0.0112021	0.728123	0.302245
chr4	190089646	190089646	.	-6.65821	0.0144402	0	1
chr4	190192785	190192785	.	6.65821	0.0144402	1	0
chr5	562560	562560	.	6.65821	0.0144402	1	0
chr5	740459	740459	ZDHHC11B	6.65821	0.0144402	1	0
chr5	788144	788144	.	-0.0649089	0.000472692	0.935046	0.978536
chr5	1023740	1023740	NKD2	6.65821	0.0262631	1	0
chr5	1982694	1982694	.	1.19532	4.61475e-05	0.431856	0.182954
chr5	4630805	4630805	.	0.0525855	0.049492	0.97939	0.943976
chr5	18390389	18390389	.	-1.32315	0.0207525	0.254624	0.652122
chr5	23635801	23635801	.	-1.47888	0.0306622	0.141859	0.413279
chr5	28880256	28880256	.	1.88515	0.0316154	0.634285	0.164418
chr5	28922413	28922413	.	-1.37171	0.0342184	0.280044	0.740569
chr5	28941664	28941664	.	-1.18419	0.0433118	0.336177	0.776637
chr5	29045797	29045797	.	0.878969	0.0461735	0.740115	0.397879
chr5	29047360	29047360	.	0.864338	0.0157819	0.771695	0.419384
chr5	43087399	43087399	LOC100506639	6.65821	6.35966e-09	1	0
chr5	46564910	46564910	.	6.65821	0.00323659	1	0
chr5	46853035	46853035	.	-6.65821	0.000401919	0	1
chr5	46937077	46937077	.	6.65821	0.0144402	1	0
chr5	47109443	47109443	.	6.65821	0.000120821	1	0
chr5	47184670	47184670	.	6.65821	0.0144402	1	0
chr5	47195211	47195211	.	6.65821	2.22975e-10	1	0
chr5	47222831	47222831	.	6.65821	0.0144402	1	0
chr5	51158937	51158937	.	-0.107421	0.0448105	0.894997	0.964954
chr5	55427854	55427854	PLPP1	0.0604538	0.0264125	0.997549	0.956202
chr5	63646177	63646177	.	-0.214036	0.0241012	0.831767	0.96639
chr5	65643741	65643741	TRAPPC13	0.0999278	0.0266405	0.995722	0.928418
chr5	65867300	65867300	.	0.932157	0.0144402	0.223764	0.11251
chr5	68670062	68670062	.	4.97837	0.0215719	0.305238	0
chr5	68670514	68670514	.	4.24823	0.0431855	0.276213	0.00506073
chr5	68707665	68707665	.	1.43473	0.0144402	0.549959	0.197137
chr5	69844654	69844654	.	-6.65821	8.42046e-07	0	1
chr5	70039969	70039969	SERF1A,SERF1B	6.65821	2.21743e-05	1	0
chr5	70771835	70771835	GUSBP16	6.65821	0.000666966	1	0
chr5	71248827	71248827	GUSBP16,GUSBP17	6.65821	0.0144402	1	0
chr5	71248860	71248860	GUSBP16,GUSBP17	6.65821	0.000666966	1	0
chr5	73446854	73446854	FOXD1	2.09757	0.0107938	0.081282	0.0113282
chr5	75270523	75270523	.	6.65821	0.00323659	1	0
chr5	76989731	76989731	.	-0.184855	0.0203318	0.817051	0.930111
chr5	78506037	78506037	LHFPL2	-0.0692977	0.0172733	0.91524	0.960767
chr5	80316463	80316463	.	-0.50781	0.0200998	0.695113	0.992593
chr5	81317450	81317450	.	0.108645	0.00396247	0.993204	0.92043
chr5	90595332	90595332	ADGRV1	6.65821	0.000120821	1	0
chr5	95274784	95274784	MCTP1	0.0731211	0.0449127	0.987202	0.937919
chr5	96272500	96272500	LOC101929710	0.485102	0.0451965	0.946063	0.673056
chr5	96315154	96315154	LOC101929710	-3.95603	0.00751105	0.00349038	0.199367
chr5	96327533	96327533	LOC101929710	-3.23249	0.0144402	0.0201434	0.273315
chr5	96328531	96328531	LOC101929710	-3.01446	0.00785512	0.0248016	0.271218
chr5	96344535	96344535	LOC101929710	-4.90856	1.97941e-05	0.00208333	0.352918
chr5	96377517	96377517	LOC101929710	-3.25599	0.0212107	0.0278426	0.351519
chr5	112829354	112829354	APC	0.0592985	0.0050249	0.996914	0.956366
chr5	113619656	113619656	.	-0.159836	0.0007099	0.873876	0.977431
chr5	119043472	119043472	LOC105379143	0.916218	0.021583	0.909419	0.477197
chr5	119187414	119187414	DMXL1	-2.37224	0.00731239	0.0958078	0.537813
chr5	119200538	119200538	DMXL1	-2.34476	0.0156095	0.0995856	0.546667
chr5	131452036	131452036	RAPGEF6	0.0761252	0.0300617	0.992932	0.941383
chr5	137165967	137165967	SPOCK1	1.9759	0.0347144	0.381485	0.0895202
chr5	137603664	137603664	.	0.0500151	0.0323219	0.987417	0.953432
chr5	141415400	141415400	PCDHGA1,PCDHGA10,PCDHGA2,PCDHGA3,PCDHGA4,PCDHGA5,PCDHGA6,PCDHGA7,PCDHGA8,PCDHGA9,PCDHGB1,PCDHGB2,PCDHGB3,PCDHGB4,PCDHGB5,PCDHGB6	1.35063	0.0341789	0.194528	0.0701997
chr5	155227314	155227314	.	-0.178398	0.03807	0.798203	0.904585
chr5	156807868	156807868	.	0.0890351	0.00711011	0.987051	0.927379
chr5	157930811	157930811	.	1.75885	0.045377	0.110815	0.025699
chr5	158753023	158753023	EBF1	-0.134716	0.0324486	0.890078	0.978175
chr5	159322079	159322079	IL12B	0.898589	0.0134809	0.787494	0.417785
chr5	162333576	162333576	.	-0.0575952	0.0143227	0.894279	0.93111
chr5	167342628	167342628	TENM2	-0.11466	0.015862	0.891265	0.965817
chr5	170944098	170944098	RANBP17	-0.135006	0.00880011	0.886764	0.974734
chr5	171266485	171266485	RANBP17	0.0938804	0.0413679	0.984302	0.92166
chr5	171403717	171403717	NPM1	6.65821	8.42046e-07	1	0
chr5	176306055	176306055	SIMC1	6.65821	2.21743e-05	1	0
chr5	178395221	178395221	COL23A1	6.65821	0.00323659	1	0
chr5	179411928	179411928	.	6.65821	0.0144402	1	0
chr5	181437338	181437338	.	6.65821	0.00454352	1	0
chr5	181439666	181439666	.	-6.65821	0.0211048	0	1
chr5	181447724	181447724	.	6.65821	0.0144402	1	0
chr5	181463374	181463374	.	6.65821	2.21743e-05	1	0
chr6	3438503	3438503	SLC22A23	4.65372	0.0426043	0.241715	0
chr6	6136380	6136380	.	-0.124094	0.0457335	0.836027	0.91202
chr6	6334624	6334624	.	-0.0662758	0.0211467	0.954651	1
chr6	6729082	6729082	.	-0.0554139	0.0475659	0.957455	0.995338
chr6	8245208	8245208	.	-0.0835087	0.000582278	0.918343	0.973665
chr6	12696332	12696332	.	-0.168647	0.0400963	0.84565	0.951754
chr6	15189705	15189705	.	6.65821	0.000120821	1	0
chr6	26156329	26156329	.	-1.50803	0.02967	0.000801282	0.0207212
chr6	26780031	26780031	.	-6.65821	0.000666966	0	1
chr6	30297748	30297748	HCG17,HCG18	0.640066	0.00235655	0.927844	0.591799
chr6	31054497	31054497	HCG22	1.39135	0.00339824	0.764129	0.285104
chr6	31055051	31055051	HCG22	1.72249	0.00842461	0.747714	0.219607
chr6	31059926	31059926	.	1.07199	0.0144402	0.842702	0.395599
chr6	31064609	31064609	.	1.39215	0.00323659	0.734182	0.273531
chr6	31067213	31067213	.	0.912162	0.0410874	0.883941	0.46503
chr6	31070816	31070816	.	1.65048	0.00082683	0.594258	0.182477
chr6	31070832	31070832	.	1.38633	0.0104539	0.46753	0.172673
chr6	31075454	31075454	.	1.38777	0.0442807	0.700766	0.261623
chr6	31077208	31077208	.	1.21363	0.00842461	0.74867	0.317125
chr6	31077264	31077264	.	1.15834	0.0449209	0.741499	0.326692
chr6	31080738	31080738	.	1.3074	0.0341247	0.762127	0.301976
chr6	31084669	31084669	.	1.3069	0.0262631	0.728843	0.288632
chr6	31085738	31085738	.	1.20858	0.0275042	0.819635	0.348978
chr6	31454630	31454630	.	6.65821	0.000666966	1	0
chr6	31854265	31854265	.	0.577838	0.0236896	1	0.666667
chr6	32372291	32372291	TSBP1-AS1	-0.966995	0.0276752	0.422714	0.835854
chr6	41424269	41424269	.	1.33694	0.0172733	0.654698	0.253126
chr6	41995050	41995050	CCND3	0.0749046	0.0380302	0.988713	0.938183
chr6	43638652	43638652	MAD2L1BP	-1.17906	0.0144402	0.329456	0.75863
chr6	44629881	44629881	.	1.19023	0.000141536	0.539507	0.230813
chr6	45572870	45572870	.	1.01499	0.0459002	0.782621	0.382215
chr6	48026870	48026870	PTCHD4	-1.93651	0.0210921	0.132053	0.533749
chr6	59439613	59439613	.	6.65821	0.0144402	1	0
chr6	61894708	61894708	KHDRBS2	-0.170009	0.0155391	0.835202	0.940907
chr6	64448314	64448314	EYS	-0.112303	0.00136043	0.909056	0.983456
chr6	72158555	72158555	RIMS1	-4.12502	0.00478526	0.00925926	0.326042
chr6	72159360	72159360	RIMS1	-4.75317	1.19631e-05	0.00287037	0.337086
chr6	75441685	75441685	FILIP1,LOC101928540	0.577838	0.000463454	1	0.666667
chr6	75441698	75441698	FILIP1,LOC101928540	0.577838	5.0987e-05	1	0.666667
chr6	75600657	75600657	.	0.105477	0.0144402	0.98752	0.917192
chr6	76744591	76744591	.	6.31123	0.0269552	0.784091	0
chr6	80835326	80835326	.	-0.163749	0.0167252	0.786778	0.882546
chr6	81853508	81853508	LINC02542	-0.467837	0.0276047	0.675579	0.938179
chr6	84299804	84299804	.	1.15559	0.00915795	0.518078	0.227044
chr6	84897628	84897628	.	0.944718	0.0262259	0.519781	0.265237
chr6	88727964	88727964	RNGTT	-0.397918	0.0189444	0.722272	0.954845
chr6	89269085	89269085	GABRR2	-0.0711847	0.0220192	0.922919	0.970106
chr6	104335743	104335743	.	-0.144196	0.0170776	0.855886	0.946903
chr6	105669482	105669482	.	1.2162	0.00911224	0.807268	0.341765
chr6	105770715	105770715	.	-0.0864402	0.0102072	0.935448	0.993827
chr6	113156243	113156243	.	-4.08469	0.0156095	0.00138889	0.18324
chr6	113158132	113158132	.	-4.56111	0.0144402	0.0014881	0.261193
chr6	119763164	119763164	LOC105377975	-0.316434	0.0147588	0.68376	0.853904
chr6	127239363	127239363	.	1.75702	0.00172799	0.491964	0.13851
chr6	131559846	131559846	.	0.0849732	0.00488643	0.997917	0.940266
chr6	143174129	143174129	AIG1	-2.69448	0.0494361	0.0250822	0.217095
chr6	149146346	149146346	.	-0.0918609	0.00906377	0.923171	0.984521
chr6	149309466	149309466	TAB2	1.28655	0.0144402	0.691017	0.277369
chr6	151235200	151235200	.	-0.770579	0.0291748	0.577414	0.992102
chr6	153893222	153893222	.	0.805163	0.0182572	0.48862	0.275359
chr6	158239969	158239969	.	6.65821	0.0144402	1	0
chr6	158281210	158281210	.	0.300725	0.0255282	0.950877	0.770083
chr6	165621429	165621429	PDE10A	0.120233	0.0133942	0.97076	0.892337
chr6	166569489	166569489	RPS6KA2	0.0731914	0.0487462	0.992773	0.943168
chr6	168090161	168090161	.	1.10459	0.0131769	0.742837	0.340095
chr6	170214004	170214004	.	6.5834	0.00605717	0.948958	0
chr7	3446531	3446531	SDK1	-0.146612	0.0417535	0.828233	0.917896
chr7	4990222	4990222	RNF216P1	1.28477	0.0282039	0.274179	0.106638
chr7	5166987	5166987	.	2.91741	0.0192391	0.542499	0.0631313
chr7	6251449	6251449	CYTH3	-0.110723	0.0374749	0.886797	0.958333
chr7	6324863	6324863	.	-0.0999361	0.0305018	0.887361	0.951726
chr7	11329266	11329266	.	-3.19703	0.00593954	0.0229167	0.291868
chr7	11334023	11334023	.	-3.34334	0.0144402	0.0191592	0.285951
chr7	11643594	11643594	THSD7A	-0.51951	0.0262259	0.53357	0.76919
chr7	11992034	11992034	.	-0.0705816	0.0420841	0.89294	0.938214
chr7	16727065	16727065	.	1.21974	0.0115849	0.777733	0.32822
chr7	16916798	16916798	.	-0.162536	0.0188947	0.881948	0.988316
chr7	20798459	20798459	.	-6.65821	0.0144402	0	1
chr7	22821366	22821366	TOMM7	0.724044	0.0434076	0.883402	0.530864
chr7	22830455	22830455	.	0.949365	0.00887639	0.778156	0.398155
chr7	22831202	22831202	.	1.01451	0.0024878	0.799737	0.390818
chr7	23040457	23040457	.	6.65821	0.0144402	1	0
chr7	27297521	27297521	.	0.895377	0.018992	0.155806	0.0791387
chr7	28206612	28206612	JAZF1-AS1	-0.172997	0.0058817	0.813464	0.918372
chr7	33991401	33991401	BMPER	-0.462503	0.0222395	0.694594	0.960882
chr7	42783678	42783678	.	4.622	0.0433118	0.236241	0
chr7	42866580	42866580	.	1.44273	0.00359485	0.740615	0.26613
chr7	43286765	43286765	HECW1	-0.138311	0.0299548	0.881579	0.971286
chr7	51124589	51124589	COBL	1.76774	0.0305522	0.620611	0.17519
chr7	52027325	52027325	.	6.65821	0.00323659	1	0
chr7	52102111	52102111	.	-0.158516	0.0262631	0.837378	0.935791
chr7	52143854	52143854	.	3.31182	3.83668e-05	0.50548	0.0419103
chr7	52165931	52165931	.	1.87249	0.00323659	0.6764	0.177457
chr7	52177293	52177293	.	3.18184	2.22975e-10	0.657387	0.0635439
chr7	55154200	55154200	EGFR	-0.098007	0.0422483	0.899698	0.963644
chr7	56996902	56996902	.	5.67409	0.0436234	0.500588	0
chr7	57004324	57004324	.	6.62012	0.00334475	0.973684	0
chr7	57619157	57619157	.	1.3403	0.0108584	1	0.388889
chr7	58337096	58337096	.	6.65821	4.59714e-06	1	0
chr7	58793453	58793453	.	0.42288	0.0345085	0.954472	0.709432
chr7	59190376	59190376	.	6.65821	0.0262631	1	0
chr7	59264755	59264755	.	6.65821	2.27438e-06	1	0
chr7	59320121	59320121	.	6.65821	0.0144402	1	0
chr7	59351267	59351267	.	0.985786	0.000152599	1	0.5
chr7	59723500	59723500	.	6.65821	3.13582e-07	1	0
chr7	59872046	59872046	.	6.65821	0.000666966	1	0
chr7	60414924	60414924	.	6.65821	0.000120821	1	0
chr7	60584401	60584401	.	6.65821	0.000120821	1	0
chr7	60746329	60746329	.	1.16673	0.00323659	0.985294	0.433333
chr7	61149345	61149345	.	0.985786	0.00593954	1	0.5
chr7	61212730	61212730	.	6.65821	0.0144402	1	0
chr7	61213459	61213459	.	-6.65821	0.0144402	0	1
chr7	61486590	61486590	.	6.581	0.00167862	0.947368	0
chr7	61591771	61591771	.	-6.65821	0.00323659	0	1
chr7	63400740	63400740	.	6.65821	2.84916e-08	1	0
chr7	63762852	63762852	.	6.65821	0.0144402	1	0
chr7	65648318	65648318	INTS4P2,LOC441242	-6.65821	0.0144402	0	1
chr7	65648339	65648339	INTS4P2,LOC441242	-6.65821	0.00323659	0	1
chr7	73121543	73121543	SPDYE10P,SPDYE14	6.65821	0.0144402	1	0
chr7	73555374	73555374	BCL7B	-0.216404	0.00789121	0.798748	0.929631
chr7	74087958	74087958	LIMK1	0.125869	0.00626756	0.969105	0.887302
chr7	75160959	75160959	NCF1C	6.65821	0.00323659	1	0
chr7	76438434	76438434	ZP3	0.1416	0.0300617	0.987103	0.893887
chr7	76964092	76964092	.	6.65821	3.5798e-06	1	0
chr7	78718791	78718791	MAGI2	1.22801	0.0431855	0.580582	0.242123
chr7	89407418	89407418	.	-0.102767	0.0170408	0.910564	0.978531
chr7	102501860	102501860	RASA4B	6.65821	0.00323659	1	0
chr7	102549465	102549465	POLR2J3	6.65821	6.88987e-07	1	0
chr7	102549647	102549647	POLR2J3	6.65821	0.000666966	1	0
chr7	104374302	104374302	LHFPL3	0.809168	0.0219938	0.699954	0.395178
chr7	108401426	108401426	NRCAM	-4.37772	0.028872	0.00768098	0.357562
chr7	108421144	108421144	NRCAM	-4.95067	0.00323659	0	0.299242
chr7	108632043	108632043	.	0.0979433	0.00785512	0.980724	0.915697
chr7	112025601	112025601	DOCK4	-0.109186	0.0258027	0.871241	0.940524
chr7	112261490	112261490	ZNF277	0.125264	9.60328e-05	0.992989	0.909577
chr7	113155278	113155278	.	1.53604	0.00198897	0.691539	0.231913
chr7	113186269	113186269	.	1.94061	0.0231358	0.669782	0.167088
chr7	113197681	113197681	.	1.7876	0.0353895	0.611062	0.169893
chr7	113776392	113776392	.	6.65821	8.42046e-07	1	0
chr7	125632725	125632725	.	-0.0788585	0.0414963	0.852992	0.901477
chr7	134665380	134665380	BPGM	1.00725	0.0449209	0.926551	0.455929
chr7	135025918	135025918	AGBL3	-3.29947	0.0351316	0.0324405	0.40785
chr7	135152802	135152802	CYREN,TMEM140	0.399294	0.0259948	0.978117	0.739219
chr7	139106392	139106392	ZC3HAV1	2.89821	0.00345403	0.19356	0.0173052
chr7	140190301	140190301	.	0.196977	0.0162534	0.971209	0.845984
chr7	140362890	140362890	SLC37A3	6.65821	0.00323659	1	0
chr7	141926061	141926061	.	6.65821	0.000668116	1	0
chr7	143355193	143355193	FAM131B,TCAF2	-0.103355	0.0414963	0.904476	0.972393
chr7	143703407	143703407	TCAF2	6.65821	0.0144402	1	0
chr7	145798290	145798290	.	-0.139974	0.0429666	0.826538	0.911769
chr7	146224405	146224405	.	-1.63745	0.0426004	0.132014	0.431827
chr7	146233010	146233010	.	-1.81327	0.00785512	0.15023	0.553109
chr7	149078624	149078624	ZNF786	0.04683	0.0300679	0.995466	0.963352
chr7	151678075	151678075	PRKAG2	-3.11052	0.00433322	0.0161291	0.215676
chr7	151685497	151685497	PRKAG2	-2.78314	0.000764957	0.0449816	0.368465
chr7	152695482	152695482	.	-3.71492	3.22017e-06	0.0289688	0.501703
chr7	152707357	152707357	.	-2.94105	0.00101198	0.056885	0.503656
chr7	152708513	152708513	.	-2.92625	0.000495363	0.06309	0.545581
chr7	158389695	158389695	PTPRN2	1.50239	0.013947	0.589212	0.201502
chr7	158399954	158399954	PTPRN2	1.59909	0.00334475	0.588304	0.187491
chr7	158401142	158401142	PTPRN2	1.51181	0.0179278	0.602207	0.204683
chr7	158402165	158402165	PTPRN2	1.70423	0.0040573	0.596292	0.176062
chr7	158829658	158829658	.	-2.50966	0.0203426	0	0.0469487
chr8	1015580	1015580	DLGAP2	6.65821	0.000120821	1	0
chr8	1238005	1238005	DLGAP2	0.577838	0.0236896	1	0.666667
chr8	1397482	1397482	DLGAP2	6.65821	0.0144402	1	0
chr8	1397895	1397895	DLGAP2	0.985786	8.43338e-05	1	0.5
chr8	1399542	1399542	DLGAP2	6.65821	0.000666966	1	0
chr8	1641199	1641199	DLGAP2	-0.10267	0.0176577	0.914301	0.982476
chr8	2296944	2296944	.	6.61798	0.00624004	0.972222	0
chr8	2296956	2296956	.	6.65821	1.03757e-09	1	0
chr8	2297656	2297656	.	6.65821	1.59113e-07	1	0
chr8	2300330	2300330	.	6.65821	0.00323659	1	0
chr8	2312107	2312107	.	6.65821	0.0144402	1	0
chr8	2423262	2423262	.	1.95777	0.0179278	1	0.25
chr8	2424928	2424928	.	0.836615	0.0337629	1	0.555556
chr8	3038601	3038601	CSMD1	-0.128374	0.00716672	0.881616	0.96459
chr8	7257169	7257169	.	6.65821	0.000668116	1	0
chr8	7270298	7270298	LINC00965	0.985786	0.00593954	1	0.5
chr8	7426236	7426236	.	-0.0739457	0.0411236	0.949536	1
chr8	7559333	7559333	.	6.65821	0.00323659	1	0
chr8	7676275	7676275	.	6.65821	0.00323659	1	0
chr8	7711484	7711484	.	6.65821	2.21743e-05	1	0
chr8	7712722	7712722	.	6.65821	0.00454352	1	0
chr8	7765124	7765124	.	-0.0385278	0.0283693	0.955301	0.981427
chr8	7802618	7802618	.	0.985786	6.88987e-07	1	0.5
chr8	7809780	7809780	.	0.985786	2.21743e-05	1	0.5
chr8	7822537	7822537	DEFB105A,DEFB105B	1.95777	0.0337136	1	0.25
chr8	8002767	8002767	FAM66E	6.65821	0.0144402	1	0
chr8	8086553	8086553	.	6.65821	0.00454352	1	0
chr8	8169888	8169888	FAM85B	2.14951	0.00666962	0.790079	0.17033
chr8	8178690	8178690	FAM85B	1.42729	0.000668116	0.362209	0.128398
chr8	8192481	8192481	FAM85B	1.50842	0.0228939	0.326487	0.108273
chr8	8402935	8402935	.	1.23621	0.0224802	0.636639	0.264489
chr8	8410927	8410927	.	1.24827	0.0194272	0.654909	0.269895
chr8	8422535	8422535	.	0.821876	0.031629	0.637132	0.356086
chr8	8446991	8446991	.	1.34584	0.0337691	0.657524	0.252621
chr8	8459127	8459127	.	1.87887	0.024971	0.650235	0.169516
chr8	8471071	8471071	.	1.73247	0.000666966	0.889455	0.260679
chr8	8480637	8480637	.	0.956933	0.0445016	0.734023	0.373284
chr8	8687722	8687722	.	-0.865431	0.00318586	0.499324	0.917929
chr8	8786428	8786428	MFHAS1	2.00099	2.21743e-05	0.613763	0.145833
chr8	8792371	8792371	MFHAS1	1.80203	0.000666966	0.599756	0.164861
chr8	8795378	8795378	MFHAS1	1.8466	9.65828e-06	0.505121	0.133228
chr8	8796546	8796546	MFHAS1	2.03477	0.00219253	0.653955	0.152036
chr8	8814452	8814452	MFHAS1	1.75464	0.0400963	0.596335	0.169686
chr8	8833489	8833489	MFHAS1	-0.586565	0.000741413	0.616842	0.931308
chr8	8843341	8843341	MFHAS1	1.8408	0.0448239	0.586652	0.156566
chr8	8866407	8866407	MFHAS1	1.23388	0.00116725	0.825349	0.345167
chr8	8867718	8867718	MFHAS1	1.23354	0.00447214	0.681178	0.28394
chr8	8872977	8872977	MFHAS1	1.958	0.000128181	0.535765	0.130471
chr8	8974995	8974995	.	4.66761	0.000668116	0.501887	0.0101411
chr8	8980062	8980062	.	4.9394	0.00011331	0.427963	0.0042735
chr8	8980378	8980378	.	5.87067	0.0229641	0.575122	0
chr8	9032588	9032588	ERI1	2.08526	0.00522616	0.637303	0.14254
chr8	9044913	9044913	ERI1	2.04128	0.0144402	0.571276	0.13122
chr8	9050439	9050439	ERI1	2.00655	0.000384669	0.664012	0.15774
chr8	9050792	9050792	ERI1	1.84643	0.00252425	0.700321	0.187526
chr8	9056614	9056614	ERI1	5.02738	0.00496479	0.445548	0.00396825
chr8	9064954	9064954	ERI1	1.47653	0.0236896	0.634212	0.221499
chr8	9175582	9175582	.	1.42714	0.0033482	0.540657	0.194771
chr8	9265722	9265722	.	2.9563	0.0461735	0.423696	0.0458794
chr8	9389326	9389326	.	1.54759	0.00323659	0.557838	0.184247
chr8	9393132	9393132	.	1.30577	0.0161418	0.626522	0.247477
chr8	9397518	9397518	.	-0.205509	0.0193283	0.794211	0.91733
chr8	9447762	9447762	.	0.891401	0.0459957	0.684391	0.36434
chr8	9449704	9449704	.	1.04645	0.0272138	0.711265	0.339206
chr8	9883522	9883522	.	1.23145	0.00862498	0.544575	0.226187
chr8	9893361	9893361	.	0.554781	0.0211048	0.912959	0.618314
chr8	9917354	9917354	.	-2.83914	0.0157819	0.0419372	0.361658
chr8	9933632	9933632	.	-1.95441	0.0131733	0.061207	0.265969
chr8	10119030	10119030	MSRA	1.99797	0.014476	0.622669	0.14839
chr8	10119295	10119295	MSRA	1.64056	0.00733056	0.706821	0.219907
chr8	10120960	10120960	MSRA	1.8362	0.0228939	0.588862	0.157716
chr8	10121012	10121012	MSRA	1.8355	0.0398245	0.611987	0.164278
chr8	10121408	10121408	MSRA	1.98784	0.0345114	0.604969	0.145044
chr8	10625230	10625230	RP1L1	2.37358	0.000402563	0.578214	0.103505
chr8	11048764	11048764	XKR6	1.55445	0.00584518	0.650272	0.214795
chr8	11049610	11049610	XKR6	1.69186	0.00715637	0.649256	0.194059
chr8	11049969	11049969	XKR6	1.8033	0.000362706	0.285145	0.0745644
chr8	11052832	11052832	XKR6	-1.05203	0.0262628	0.416793	0.87493
chr8	11222505	11222505	.	-1.09679	0.049492	0.356328	0.773495
chr8	11749821	11749821	GATA4	0.864743	0.000534108	0.927891	0.505037
chr8	11755453	11755453	GATA4	1.33342	0.000297008	0.631112	0.244409
chr8	11899094	11899094	.	3.24318	0.019523	0.488912	0.0426901
chr8	11923714	11923714	.	2.90647	0.0161258	0.448147	0.051104
chr8	11932354	11932354	.	2.81995	0.0126169	0.55379	0.0698413
chr8	11933829	11933829	.	3.27352	0.00747822	0.508803	0.0436508
chr8	11933952	11933952	.	2.7762	0.0240963	0.510943	0.0660451
chr8	11934169	11934169	.	2.44467	0.0144402	0.447701	0.0740741
chr8	11935192	11935192	.	2.9926	0.0144402	0.439955	0.0465337
chr8	11942823	11942823	.	2.81457	0.0432689	0.443755	0.0544988
chr8	11970679	11970679	.	-0.55458	8.47783e-05	0.628227	0.92739
chr8	11971220	11971220	.	1.86442	0.0492768	0.60018	0.157576
chr8	11972641	11972641	.	2.49808	0.0170744	0.583883	0.0951248
chr8	11989568	11989568	.	1.83242	0.00998976	0.500969	0.133476
chr8	12007611	12007611	.	1.64933	0.0139871	0.517536	0.158172
chr8	12034996	12034996	.	1.86049	0.0261323	0.432194	0.111772
chr8	12036529	12036529	.	1.92565	0.0179486	0.484053	0.120046
chr8	12037079	12037079	.	2.27266	0.0012031	0.469064	0.0891414
chr8	12037679	12037679	.	1.96636	0.0181046	0.531124	0.128472
chr8	12450972	12450972	LOC100506990	0.985786	8.43338e-05	1	0.5
chr8	16984449	16984449	.	-0.108535	0.00650091	0.832584	0.898418
chr8	17399307	17399307	MTMR7	-2.05283	0.000128054	0.144554	0.631278
chr8	17408118	17408118	MTMR7	3.10539	0.0273642	0.689281	0.0712522
chr8	17411452	17411452	MTMR7	-1.44407	0.00709433	0.139604	0.397054
chr8	18080702	18080702	ASAH1	0.118074	0.0195143	0.969524	0.89255
chr8	19585500	19585500	CSGALNACT1	-0.0495451	0.0183707	0.945757	0.979149
chr8	20276563	20276563	LZTS1,LZTS1-AS1	5.52504	0.00323659	0.450472	0
chr8	21167674	21167674	.	-0.131366	0.0414963	0.837804	0.918625
chr8	22047858	22047858	FGF17	1.24186	0.0144402	0.177578	0.0693133
chr8	23055264	23055264	TNFRSF10B	0.0550716	0.0411236	0.99213	0.954597
chr8	23791765	23791765	.	-0.0847842	0.0217206	0.91156	0.967342
chr8	25752811	25752811	.	-0.134654	0.00998543	0.874946	0.96152
chr8	27259326	27259326	.	-0.066296	0.0477643	0.889013	0.931289
chr8	30531188	30531188	RBPMS	-0.134576	0.0356114	0.834701	0.917287
chr8	37927104	37927104	.	-6.65821	1.59113e-07	0	1
chr8	41435060	41435060	.	4.99689	0.0228939	0.30931	0
chr8	41436187	41436187	.	5.48897	0.00538129	0.439101	0
chr8	44935826	44935826	.	6.48537	0.0013071	0.885965	0
chr8	45360371	45360371	.	6.65821	0.0144402	1	0
chr8	45551718	45551718	.	6.65821	0.0144402	1	0
chr8	45782885	45782885	.	6.65821	0.00323659	1	0
chr8	49839906	49839906	.	4.80911	0.0401185	0.270341	0
chr8	49862437	49862437	.	4.69003	0.0404034	0.248131	0
chr8	64862560	64862560	.	-0.132721	0.0172733	0.868726	0.9534
chr8	74661954	74661954	MIR2052HG	-0.0978567	0.00651654	0.886716	0.94965
chr8	76549332	76549332	.	0.969603	0.0360469	0.669091	0.336776
chr8	84447762	84447762	RALYL	0.723034	0.0456261	0.531373	0.317976
chr8	84523109	84523109	RALYL	0.965637	0.00323659	0.557376	0.280526
chr8	84538174	84538174	RALYL	0.72297	0.0121211	0.591137	0.354198
chr8	85649330	85649330	.	-0.519489	0.029737	0.594259	0.856173
chr8	85737056	85737056	REXO1L2P	6.65821	0.0144402	1	0
chr8	85804968	85804968	.	0.985786	0.0433118	1	0.5
chr8	87711529	87711529	.	2.65422	0.00631135	0.515597	0.0734934
chr8	87723643	87723643	.	3.58203	0.00333306	0.608743	0.0416667
chr8	87738125	87738125	.	2.17138	0.0199383	0.606349	0.126828
chr8	90165296	90165296	.	-0.111032	0.0448239	0.860875	0.930546
chr8	90185552	90185552	.	-2.73387	0.00679096	0.0449875	0.355797
chr8	93565643	93565643	LINC00535	2.02711	0.0222448	0.0665783	0.00878817
chr8	117403310	117403310	.	1.18835	0.00915795	0.736067	0.317379
chr8	117420366	117420366	.	1.1524	0.0124194	0.445139	0.194756
chr8	117427349	117427349	.	1.57085	0.00166988	0.833929	0.274074
chr8	117432216	117432216	.	1.45571	0.0409629	0.542837	0.191552
chr8	117434337	117434337	.	1.17139	0.00062748	0.735874	0.321163
chr8	117438532	117438532	.	1.36689	0.00120149	0.736138	0.279298
chr8	120181876	120181876	COL14A1	0.10189	0.00797927	0.980576	0.913031
chr8	127316593	127316593	CASC21,CASC8	6.65821	1.72795e-05	1	0
chr8	129594132	129594132	CCDC26	-0.0921649	0.0144402	0.896819	0.95664
chr8	133183467	133183467	.	-0.138037	0.0457523	0.86895	0.957203
chr8	134658253	134658253	ZFAT	0.0708284	0.000668253	0.997685	0.949408
chr8	139801029	139801029	TRAPPC9	0.985786	0.0433118	1	0.5
chr8	140437928	140437928	TRAPPC9	0.843313	0.037677	0.520372	0.285609
chr8	143567375	143567375	MROH6	1.47161	0.0121211	0.373017	0.128108
chr8	143666671	143666671	.	6.65821	0.00323659	1	0
chr8	143684882	143684882	ZNF707	-2.0709	0.0276745	0.00629209	0.0584512
chr9	976396	976396	.	-3.00671	0.0277776	0.00347222	0.0982804
chr9	1645849	1645849	.	-0.0900061	0.048339	0.913042	0.972463
chr9	4479036	4479036	.	1.98878	0.0248847	0.391852	0.0912477
chr9	5433652	5433652	PLGRKT	0.0755782	0.0291972	0.998106	0.946654
chr9	6594649	6594649	GLDC	0.0875514	0.0262631	0.982848	0.924388
chr9	6660864	6660864	.	4.66406	0.0219938	0.243526	0
chr9	7240105	7240105	.	1.2937	0.014158	0.759256	0.303782
chr9	22458192	22458192	.	2.64033	0.0259837	0.439132	0.062037
chr9	22507926	22507926	.	5.71186	0.000120821	0.514133	0
chr9	27600044	27600044	.	1.32411	0.0337752	0.21623	0.080355
chr9	31484499	31484499	.	-0.0451013	0.0130073	0.905054	0.934113
chr9	34137824	34137824	.	6.65821	8.42046e-07	1	0
chr9	39215210	39215210	CNTNAP3	6.65821	0.00323659	1	0
chr9	39452055	39452055	ZNF658B	-1.56421	0.0193684	0.247798	0.75235
chr9	39873825	39873825	FGF7P3	-6.39803	0.00548322	0	0.833333
chr9	40197183	40197183	.	1.95777	0.00323659	1	0.25
chr9	40359541	40359541	.	1.95777	0.000240117	1	0.25
chr9	40461365	40461365	.	6.65821	2.21743e-05	1	0
chr9	41852304	41852304	.	6.65821	0.00323659	1	0
chr9	42009283	42009283	CNTNAP3B	6.65821	0.00323659	1	0
chr9	42660333	42660333	.	6.65821	0.000666966	1	0
chr9	43317790	43317790	.	6.65821	0.0144402	1	0
chr9	43319292	43319292	.	6.65821	0.000120821	1	0
chr9	43376860	43376860	.	6.65821	2.21743e-05	1	0
chr9	44117102	44117102	.	6.65821	0.00454352	1	0
chr9	44302283	44302283	.	6.65821	0.0144402	1	0
chr9	44356220	44356220	.	6.65821	0.0144402	1	0
chr9	44425646	44425646	.	0.767441	0.012963	1	0.583333
chr9	44447071	44447071	.	6.58496	0.042222	0.95	0
chr9	44489271	44489271	.	6.65821	0.000120821	1	0
chr9	44674157	44674157	.	0.330945	0.0495859	0.9875	0.783028
chr9	44720259	44720259	.	6.65821	0.0262631	1	0
chr9	44884828	44884828	.	6.65821	2.21743e-05	1	0
chr9	44913709	44913709	.	0.285974	0.00343406	0.972889	0.796154
chr9	45011208	45011208	.	0.351318	0.0156095	0.993132	0.776323
chr9	45084697	45084697	.	6.65821	0.0144402	1	0
chr9	45178723	45178723	.	6.65821	8.42046e-07	1	0
chr9	60952185	60952185	.	6.65821	0.0144402	1	0
chr9	61869156	61869156	.	-6.65821	0.00323659	0	1
chr9	61882164	61882164	.	6.65821	0.00323659	1	0
chr9	61941984	61941984	.	6.65821	9.66876e-10	1	0
chr9	61998399	61998399	.	6.65821	0.00323659	1	0
chr9	62008805	62008805	.	6.65821	0.0262631	1	0
chr9	62329492	62329492	.	6.65821	0.00011331	1	0
chr9	62479622	62479622	LINC01189	-6.65821	0.0211048	0	1
chr9	62525254	62525254	.	0.101162	0.0144402	0.97338	0.906788
chr9	62682111	62682111	.	6.65821	0.0144402	1	0
chr9	63335041	63335041	LOC100996643,LOC105379443	6.65821	0.000666966	1	0
chr9	63420450	63420450	.	6.65821	0.000666966	1	0
chr9	64331227	64331227	.	-6.65821	0.000668116	0	1
chr9	64923281	64923281	.	0.232146	0.00164352	1	0.849881
chr9	65160795	65160795	LOC101929583,LOC105379443	6.65821	0.000666966	1	0
chr9	65199103	65199103	.	6.65821	0.000666966	1	0
chr9	65842875	65842875	LOC101928195,LOC101929583,LOC105379443	6.65821	0.0144402	1	0
chr9	67487700	67487700	.	2.46684	0.00742108	0.966667	0.166667
chr9	67546796	67546796	.	6.65821	2.21743e-05	1	0
chr9	70732331	70732331	TRPM3	6.65821	1.71585e-12	1	0
chr9	73925622	73925622	.	-2.32254	0.0154726	0.0548797	0.314536
chr9	74582738	74582738	RORB	0.625389	0.0266839	0.575241	0.369379
chr9	74606674	74606674	RORB	0.756881	0.00404098	0.605018	0.353952
chr9	77080118	77080118	.	-1.31035	0.00358737	0.342485	0.864168
chr9	77082893	77082893	.	-1.75729	0.0263075	0.168808	0.594483
chr9	80489912	80489912	.	-2.4761	0.00194135	0.0427083	0.283264
chr9	81710849	81710849	LOC101927502	6.65821	0.000666966	1	0
chr9	84393211	84393211	.	0.380781	0.0374502	0.902406	0.690748
chr9	92350635	92350635	CENPP	0.0741444	0.0389797	0.989035	0.938988
chr9	94530753	94530753	.	6.65821	0.00323659	1	0
chr9	94530801	94530801	.	6.65821	0.0144402	1	0
chr9	94530809	94530809	.	6.65821	0.00323659	1	0
chr9	96500879	96500879	CDC14B	0.0771471	0.048832	0.984596	0.932808
chr9	97769982	97769982	PTCSC2	1.37032	0.00498046	0.505751	0.189495
chr9	97780424	97780424	PTCSC2	1.49902	0.0084393	0.653003	0.224567
chr9	97781597	97781597	PTCSC2	1.52404	7.33987e-06	0.537164	0.180255
chr9	98508484	98508484	GABBR2	1.29091	0.0144402	0.699718	0.280057
chr9	98654565	98654565	GABBR2	0.112682	0.0311182	0.987742	0.912779
chr9	99517259	99517259	.	-0.18292	0.0273962	0.78221	0.8893
chr9	102410612	102410612	.	1.41613	0.00751105	0.674565	0.246518
chr9	102419174	102419174	.	1.62854	0.00481257	0.63415	0.198329
chr9	102421239	102421239	.	1.3401	0.0469444	0.577034	0.221874
chr9	102431829	102431829	.	1.28025	0.0144402	0.605034	0.243224
chr9	104480431	104480431	.	-0.121414	0.0410938	0.818879	0.891655
chr9	110039473	110039473	PALM2AKAP2	-0.0716185	0.0191544	0.944967	0.99357
chr9	111957097	111957097	.	-2.53931	0.00398044	0.062109	0.409177
chr9	113085557	113085557	.	-6.65821	0.0144402	0	1
chr9	113646029	113646029	.	-0.131571	0.0110455	0.888774	0.974595
chr9	115969233	115969233	.	-0.397109	0.0283693	0.568638	0.751989
chr9	117259782	117259782	ASTN2	-1.99905	0.0277859	0.0916009	0.396136
chr9	118394241	118394241	.	-0.0753361	0.0318057	0.890571	0.938848
chr9	126408625	126408625	MVB12B,NRON	0.618815	0.0200947	0.912328	0.590625
chr9	129253368	129253368	.	-0.081783	0.0243972	0.93665	0.991863
chr9	130252592	130252592	.	-0.200059	0.0245222	0.791535	0.91076
chr9	131520111	131520111	POMT1	0.0626591	0.0405538	0.991787	0.949209
chr9	132865641	132865641	AK8	-0.17337	0.0300654	0.854183	0.96453
chr9	133639526	133639526	DBH	-0.151476	0.0317233	0.850992	0.946308
chr9	133827946	133827946	VAV2	6.65821	0.00454352	1	0
chr9	134833680	134833680	COL5A1,LOC101448202	-0.141906	0.0414932	0.891171	0.984318
chr9	136580544	136580544	.	6.65821	0.0144402	1	0
chr9	137850083	137850083	.	-0.108108	0.00160565	0.898787	0.969503

## Sheet: PTSD_MDD_vs_Control1
Chromosome	Start	End	symbol	mean_log2_Experiment_over_Control	adjusted_p_value	methylation_rate_for_PTSD_MDD	methylation_rate_for_control
chr3	34377663	34377663	.	-0.122309	0.0492189	0.905904	0.986939
chr11	122639107	122639107	.	-0.117109	0.0492075	0.910983	0.988861
chr15	42093434	42093434	PLA2G4D	-0.166135	0.0492075	0.876333	0.984509
chr7	99221330	99221330	.	0.0878649	0.0489355	0.990494	0.931379
chr2	93043481	93043481	.	0.280666	0.0489271	0.968056	0.795146
chr22	42543785	42543785	.	-0.0893997	0.0489271	0.930202	0.990306
chr8	12523951	12523951	LOC100506990	-0.124826	0.0488932	0.904297	0.986928
chr17	77755491	77755491	.	-0.412546	0.0487938	0.738569	0.98637
chr2	127842810	127842810	.	-0.354236	0.0487938	0.761339	0.97601
chr13	107868015	107868015	.	2.1407	0.048671	0.0730072	0.00882353
chr15	20457906	20457906	HERC2P3	-0.159449	0.048671	0.881979	0.986216
chr15	52881953	52881953	.	0.10322	0.048671	0.989583	0.920565
chr3	28540501	28540501	.	0.151375	0.048383	0.984722	0.88564
chr12	31170093	31170093	OVOS2	0.0988916	0.0483764	0.990712	0.924415
chr5	103946197	103946197	.	-0.175994	0.0483243	0.865042	0.978571
chr4	78512793	78512793	FRAS1	0.0969753	0.0483158	0.989859	0.924859
chr10	40173982	40173982	.	1.55667	0.0482973	1	0.333333
chr7	63616737	63616737	.	1.55667	0.0482973	1	0.333333
chr15	18773886	18773886	.	0.577838	0.0482286	1	0.666667
chr18	36751668	36751668	FHOD3	0.118741	0.0482286	0.987795	0.90896
chr4	140022477	140022477	MAML3	-0.155045	0.0482286	0.882756	0.984046
chr8	48839985	48839985	.	0.131665	0.0482286	0.988839	0.901718
chr3	162123897	162123897	.	0.14597	0.0481734	0.986645	0.89074
chr1	201603872	201603872	.	-0.0973784	0.0480756	0.924726	0.989996
chr6	163198563	163198563	PACRG	0.0608085	0.0480547	0.993339	0.951927
chr1	212911035	212911035	.	-0.321401	0.0479365	0.798295	1
chr22	37983457	37983457	POLR2F,SOX10	0.0772235	0.0479332	0.991865	0.939648
chr3	80267950	80267950	.	0.0963822	0.0473834	0.990465	0.925811
chr16	2210194	2210194	BRICD5	0.0934408	0.0473562	0.990278	0.927545
chr10	47082713	47082713	.	-0.156787	0.0468072	0.883888	0.986508
chr1	86778272	86778272	.	0.0851906	0.0466732	0.991447	0.934024
chr15	36782377	36782377	CDIN1	0.0766716	0.0464441	0.99221	0.940339
chr2	233113269	233113269	INPP5D	0.316091	0.0462937	0.972917	0.779521
chr14	19038714	19038714	.	0.247003	0.0462568	1	0.841071
chr5	60920263	60920263	ERCC8	0.129328	0.0462501	0.987637	0.902097
chr6	59188789	59188789	.	0.410284	0.0462185	1	0.75
chr1	106904630	106904630	.	0.0878468	0.0460854	0.991004	0.931871
chr10	22210379	22210379	.	-0.164041	0.045759	0.878004	0.984938
chr10	38504436	38504436	.	0.214665	0.045759	0.981151	0.844121
chr13	32249600	32249600	FRY	0.122403	0.045759	0.988258	0.907055
chr2	219186156	219186156	.	-0.11829	0.045759	0.90993	0.988536
chr20	1596508	1596508	SIRPB1	-0.291404	0.0456516	0.815278	1
chr20	32807808	32807808	DNMT3B	0.0822316	0.0445195	0.991747	0.936246
chr15	41110291	41110291	INO80	0.0991593	0.0441299	0.990714	0.924244
chr18	34951130	34951130	.	-0.151886	0.0440655	0.899074	1
chr21	34814697	34814697	RUNX1	0.11601	0.0438633	0.992281	0.914841
chr6	141154312	141154312	.	0.106195	0.0432867	0.989091	0.918191
chr2	150206693	150206693	.	0.135105	0.043215	0.988381	0.89913
chr20	22577612	22577612	LINC00261	2.38874	0.043215	0.105693	0.0120915
chr8	144813711	144813711	LOC100130027	0.0923762	0.043215	0.991646	0.92952
chr6	55368458	55368458	GFRAL	-0.337896	0.0429453	0.769571	0.975309
chr10	10048577	10048577	.	0.079142	0.0427921	0.992424	0.938915
chr14	21996368	21996368	.	-0.27556	0.0427778	0.808151	0.980342
chr8	46113764	46113764	.	-0.136749	0.0427778	0.896401	0.98652
chr2	149856227	149856227	LINC01931	-0.358735	0.042569	0.764316	0.982906
chr8	117026589	117026589	SLC30A8	-0.16006	0.0423992	0.880754	0.985269
chr10	6436868	6436868	PRKCQ	0.118358	0.0422457	0.98744	0.908877
chr2	120179554	120179554	.	-0.174921	0.0416889	0.870952	0.984509
chr4	111907327	111907327	.	0.1798	0.0416889	0.984681	0.86813
chr8	97757115	97757115	.	-0.102035	0.0416889	0.921446	0.989708
chr9	40048751	40048751	.	0.26835	0.0416889	1	0.828571
chr10	10074163	10074163	.	0.0980573	0.0416789	0.991447	0.925643
chr10	6268543	6268543	.	0.102966	0.0416627	0.992037	0.923013
chr18	78693704	78693704	.	0.0716881	0.0416627	0.993323	0.944686
chr2	19989506	19989506	WDR35	2.65745	0.0416627	0.278595	0.035742
chr7	128403075	128403075	IMPDH1	-0.182386	0.0416627	0.866069	0.984127
chr1	44583733	44583733	RNF220	-0.0636223	0.0415096	0.880486	0.920635
chr3	91231944	91231944	.	-0.29169	0.0415096	0.815114	1
chr5	16894406	16894406	MYO10	0.228045	0.0412264	0.978431	0.833914
chr8	59069171	59069171	TOX	0.106542	0.0409577	0.991204	0.91993
chr5	152340946	152340946	.	-0.660091	0.0409507	0.629167	1
chr14	61111919	61111919	.	0.0991344	0.0408293	0.990821	0.92436
chr1	98244391	98244391	LINC01776	0.0744027	0.0405801	0.992879	0.942469
chr8	75031203	75031203	CRISPLD1	0.0853888	0.0405801	0.992857	0.935223
chr7	74756884	74756884	GTF2I	0.152305	0.0402594	1	0.89881
chr19	2415414	2415414	TMPRSS9	0.200556	0.0396877	0.983173	0.854274
chr4	59633702	59633702	.	0.136388	0.0394324	0.989418	0.899265
chr10	5570491	5570491	.	0.112685	0.0393215	0.990058	0.914919
chr21	9117349	9117349	TEKT4P2	4.94573	0.0393215	0.298187	0
chr10	16498475	16498475	PTER	0.131643	0.0391973	0.989542	0.902373
chr16	72301036	72301036	LINC01572	0.104219	0.0390279	0.99131	0.921527
chr8	120181876	120181876	COL14A1	0.142457	0.0388295	0.988688	0.894786
chr21	9818018	9818018	LINC01667	-0.775369	0.0387385	0.580082	1
chr2	1048682	1048682	SNTG2	-0.153935	0.038547	0.885895	0.986772
chr10	123832943	123832943	CPXM2	0.120185	0.038383	0.98989	0.909968
chr2	204486127	204486127	.	0.246735	0.0383247	0.978438	0.823057
chr12	96096940	96096940	.	-0.125091	0.0378288	0.905271	0.988173
chr8	37514396	37514396	.	-0.0949087	0.0377601	0.92792	0.991697
chr4	56900715	56900715	.	0.100519	0.0376939	0.99113	0.923751
chr4	49123829	49123829	.	0.442274	0.03759	1	0.733333
chr6	59188776	59188776	.	0.442274	0.03759	1	0.733333
chr11	20450671	20450671	PRMT3	0.090122	0.0373497	0.992045	0.931365
chr10	48932932	48932932	LRRC18,WDFY4	0.216147	0.0373264	0.982639	0.844525
chr7	86102577	86102577	.	0.0752219	0.0372238	0.993441	0.942463
chr11	66092947	66092947	PACS1	0.110106	0.0370064	0.990468	0.916954
chr20	27914501	27914501	.	0.274714	0.0366729	0.976852	0.805745
chr16	37261670	37261670	.	0.282586	0.0365891	1	0.820337
chr6	160958189	160958189	.	-0.272542	0.0363627	0.807564	0.977564
chr16	8848208	8848208	PMM2	0.147386	0.0360351	0.988038	0.891114
chr15	97323595	97323595	.	-0.130346	0.0358651	0.902356	0.988624
chr1	47456123	47456123	.	0.0894773	0.0357929	0.992424	0.932142
chr7	1210546	1210546	.	-2.52106	0.0355633	0.00934343	0.101032
chr18	35760362	35760362	.	0.187652	0.0353004	0.986472	0.864936
chr14	32962262	32962262	NPAS3	-0.243743	0.0350814	0.826437	0.980392
chr20	45374382	45374382	SYS1,SYS1-DBNDD2,TP53TG5	0.120166	0.0350814	0.990984	0.910988
chr3	147410168	147410168	ZIC1	-2.61541	0.0350814	0.0148148	0.142065
chr6	36525995	36525995	STK38	0.109381	0.0350814	0.991447	0.918327
chr7	131514282	131514282	PODXL	0.0980674	0.034356	0.992045	0.926195
chr3	106038297	106038297	.	0.0938632	0.0342549	0.99221	0.929081
chr7	31314735	31314735	.	0.113196	0.0335705	0.991319	0.915758
chr14	25339722	25339722	.	-0.263796	0.0333455	0.8169	0.982804
chr4	28665241	28665241	.	0.106897	0.0333455	0.992142	0.920572
chr13	108899194	108899194	MYO16	0.0924892	0.0331962	0.993194	0.930899
chr10	42734130	42734130	.	0.100695	0.0331844	0.991667	0.924138
chr2	232993759	232993759	NGEF	0.0956989	0.0331844	0.99274	0.928383
chr20	53445880	53445880	TSHZ2	-0.149465	0.0331844	0.889782	0.988001
chr3	141481090	141481090	.	0.0749358	0.0331844	0.994191	0.943363
chr7	97597469	97597469	.	-0.135603	0.0331844	0.899937	0.989614
chr8	73634730	73634730	STAU2	-0.100532	0.0331844	0.924741	0.9922
chr21	44128868	44128868	LOC102724159,PWP2	-0.169627	0.0327156	0.887963	1
chr4	76615281	76615281	SHROOM3	0.106626	0.0322862	0.99256	0.921135
chr22	35830581	35830581	RBFOX2	0.105871	0.0317916	0.992244	0.921329
chr17	24839432	24839432	.	5.57491	0.031311	0.466667	0
chr20	56665422	56665422	.	-0.269104	0.0310697	0.818319	0.988173
chr2	194738861	194738861	LINC01790	-0.120567	0.031002	0.911241	0.991539
chr15	27295431	27295431	GABRG3	0.162824	0.0307748	0.987795	0.881305
chr22	48355613	48355613	.	-0.162887	0.0307317	0.882433	0.989102
chr8	67899534	67899534	.	0.147584	0.030612	0.990278	0.893012
chr19	4874913	4874913	.	-0.220014	0.030249	0.857143	1
chr16	32702898	32702898	.	-0.159273	0.0299165	0.894431	1
chr5	162252219	162252219	.	0.337572	0.029808	1	0.789286
chr6	120375737	120375737	.	0.207655	0.0296315	0.984681	0.851338
chr11	123098123	123098123	CLMP	0.0697833	0.0295892	0.99497	0.947516
chr2	191281460	191281460	MYO1B	0.103993	0.0293514	0.992589	0.922863
chr1	167721501	167721501	.	2.51714	0.0289499	0.11856	0.0124579
chr7	45383081	45383081	.	0.157749	0.028307	0.989662	0.886119
chr8	12037079	12037079	.	2.86974	0.0273607	0.590992	0.0722222
chr17	3686400	3686400	P2RX5,P2RX5-TAX1BP3	-5.41504	0.0270079	0	0.416667
chr4	49758005	49758005	.	0.767441	0.0270079	1	0.583333
chr16	19953496	19953496	.	0.180623	0.0266503	0.988034	0.870587
chr2	223743280	223743280	.	0.128803	0.026095	0.99256	0.906931
chr2	206356477	206356477	.	1.39142	0.0252079	1	0.375
chr20	28684800	28684800	.	0.577838	0.0246197	1	0.666667
chr19	4875015	4875015	.	-0.318361	0.023235	0.8	1
chr21	13980261	13980261	ANKRD20A11P	3.22892	0.0230399	0.286316	0.0216049
chr17	22381858	22381858	.	-0.45465	0.0229216	0.726984	1
chr4	77436194	77436194	.	0.113762	0.0226004	0.993344	0.917265
chr7	77727244	77727244	RSBN1L	0.112502	0.0217191	0.993056	0.917809
chr22	41295671	41295671	RANGAP1	0.39471	0.0212495	0.977679	0.74127
chr1	1698439	1698439	.	6.65821	0.0203208	1	0
chr1	13150833	13150833	PRAMEF25,PRAMEF26	6.65821	0.0203208	1	0
chr1	16665564	16665564	.	6.65821	0.0203208	1	0
chr1	46241934	46241934	.	6.65821	0.0203208	1	0
chr1	65563626	65563626	LEPR	6.65821	0.0203208	1	0
chr1	103683692	103683692	.	6.65821	0.0203208	1	0
chr1	108432781	108432781	.	6.65821	0.0203208	1	0
chr1	121088262	121088262	FCGR1B,H3P4	5.57971	0.0203208	0.468254	0
chr1	122415192	122415192	.	6.65821	0.0203208	1	0
chr1	144250561	144250561	.	-6.65821	0.0203208	0	1
chr1	144250567	144250567	.	-6.65821	0.0203208	0	1
chr1	212298952	212298952	PPP2R5A	-6.65821	0.0203208	0	1
chr1	212725134	212725134	.	6.65821	0.0203208	1	0
chr1	228626940	228626940	.	6.65821	0.0203208	1	0
chr1	228626957	228626957	.	6.65821	0.0203208	1	0
chr1	228636155	228636155	.	-6.65821	0.0203208	0	1
chr10	38898351	38898351	.	6.65821	0.0203208	1	0
chr10	40236857	40236857	.	6.65821	0.0203208	1	0
chr10	40675052	40675052	.	6.65821	0.0203208	1	0
chr10	40995379	40995379	.	-6.65821	0.0203208	0	1
chr10	41218306	41218306	.	6.65821	0.0203208	1	0
chr10	85356482	85356482	.	6.65821	0.0203208	1	0
chr10	92374879	92374879	.	6.65821	0.0203208	1	0
chr11	39783791	39783791	.	6.65821	0.0203208	1	0
chr11	51102932	51102932	.	0.479724	0.0203208	1	0.714286
chr11	101703958	101703958	.	6.65821	0.0203208	1	0
chr12	14080949	14080949	.	-0.312041	0.0203208	0.789896	0.983041
chr12	37111856	37111856	.	6.65821	0.0203208	1	0
chr13	17271016	17271016	.	6.65821	0.0203208	1	0
chr14	19654102	19654102	.	-6.65821	0.0203208	0	1
chr14	64895843	64895843	.	-6.65821	0.0203208	0	1
chr14	103279120	103279120	.	-6.65821	0.0203208	0	1
chr14	103279122	103279122	.	-6.65821	0.0203208	0	1
chr14	103279130	103279130	.	-6.65821	0.0203208	0	1
chr14	105112364	105112364	.	6.65821	0.0203208	1	0
chr15	17378147	17378147	.	6.65821	0.0203208	1	0
chr15	18006321	18006321	.	6.65821	0.0203208	1	0
chr15	18270608	18270608	.	6.65821	0.0203208	1	0
chr15	18743206	18743206	.	6.65821	0.0203208	1	0
chr15	19314601	19314601	.	6.65821	0.0203208	1	0
chr15	20022628	20022628	.	6.65821	0.0203208	1	0
chr15	20517596	20517596	.	6.65821	0.0203208	1	0
chr15	22219725	22219725	.	6.65821	0.0203208	1	0
chr15	28387020	28387020	GOLGA8F,GOLGA8G,MIR1268A	6.65821	0.0203208	1	0
chr15	28502003	28502003	.	6.65821	0.0203208	1	0
chr15	30540563	30540563	.	-6.65821	0.0203208	0	1
chr15	51422175	51422175	.	6.65821	0.0203208	1	0
chr15	84463252	84463252	GOLGA6L4,LOC102724135	6.65821	0.0203208	1	0
chr15	85197270	85197270	.	6.65821	0.0203208	1	0
chr15	99928303	99928303	.	-6.65821	0.0203208	0	1
chr15	99928305	99928305	.	-6.65821	0.0203208	0	1
chr15	99928330	99928330	.	-6.65821	0.0203208	0	1
chr16	2034556	2034556	SLC9A3R2	6.65821	0.0203208	1	0
chr16	2034680	2034680	SLC9A3R2	6.65821	0.0203208	1	0
chr16	16426286	16426286	.	0.208696	0.0203208	0.989268	0.854685
chr16	22466308	22466308	SMG1P1	6.65821	0.0203208	1	0
chr16	22536253	22536253	NPIPB5	-6.65821	0.0203208	0	1
chr16	28737729	28737729	.	6.65821	0.0203208	1	0
chr16	34434204	34434204	.	6.65821	0.0203208	1	0
chr16	36425094	36425094	.	6.65821	0.0203208	1	0
chr16	36516134	36516134	.	6.65821	0.0203208	1	0
chr16	37142846	37142846	.	6.65821	0.0203208	1	0
chr16	37859231	37859231	.	6.65821	0.0203208	1	0
chr16	70205554	70205554	.	6.65821	0.0203208	1	0
chr17	288754	288754	RPH3AL	6.65821	0.0203208	1	0
chr17	1096734	1096734	ABR	-6.65821	0.0203208	0	1
chr17	19116171	19116171	.	6.65821	0.0203208	1	0
chr17	24044322	24044322	.	6.65821	0.0203208	1	0
chr17	24112013	24112013	.	-6.65821	0.0203208	0	1
chr17	24475534	24475534	.	6.65821	0.0203208	1	0
chr17	25929609	25929609	.	-6.65821	0.0203208	0	1
chr17	26181458	26181458	.	6.65821	0.0203208	1	0
chr17	26297389	26297389	.	-6.65821	0.0203208	0	1
chr17	28964063	28964063	SEZ6	0.2359	0.0203208	0.988492	0.837875
chr17	36371309	36371309	.	6.65821	0.0203208	1	0
chr17	37980326	37980326	TBC1D3D,TBC1D3H,TBC1D3I,TBC1D3L	-6.65821	0.0203208	0	1
chr17	38051685	38051685	TBC1D3C	6.65821	0.0203208	1	0
chr17	46586648	46586648	.	6.65821	0.0203208	1	0
chr17	60021472	60021472	.	-6.65821	0.0203208	0	1
chr18	16208131	16208131	.	6.65821	0.0203208	1	0
chr18	16659340	16659340	.	-6.65821	0.0203208	0	1
chr18	17209879	17209879	.	6.65821	0.0203208	1	0
chr18	17849069	17849069	.	6.65821	0.0203208	1	0
chr18	17940874	17940874	.	6.65821	0.0203208	1	0
chr18	18302049	18302049	.	6.65821	0.0203208	1	0
chr18	19287964	19287964	.	6.65821	0.0203208	1	0
chr18	19477977	19477977	.	6.65821	0.0203208	1	0
chr18	19699481	19699481	.	6.65821	0.0203208	1	0
chr18	20060180	20060180	.	6.65821	0.0203208	1	0
chr18	20282487	20282487	.	6.65821	0.0203208	1	0
chr18	20367509	20367509	.	0.836615	0.0203208	1	0.555556
chr18	20420282	20420282	.	6.65821	0.0203208	1	0
chr18	67358196	67358196	.	6.65821	0.0203208	1	0
chr19	13002340	13002340	NFIX	6.65821	0.0203208	1	0
chr19	29900559	29900559	.	6.65821	0.0203208	1	0
chr19	29900625	29900625	.	6.65821	0.0203208	1	0
chr19	36282554	36282554	.	6.65821	0.0203208	1	0
chr19	46439667	46439667	.	-6.65821	0.0203208	0	1
chr2	41746311	41746311	.	6.65821	0.0203208	1	0
chr2	87774997	87774997	RGPD1,RGPD2	0.985786	0.0203208	1	0.5
chr2	89236899	89236899	.	6.65821	0.0203208	1	0
chr2	92048753	92048753	.	-6.65821	0.0203208	0	1
chr2	110285794	110285794	.	6.65821	0.0203208	1	0
chr2	110381923	110381923	LINC01106,LINC01123	6.65821	0.0203208	1	0
chr2	110401387	110401387	.	-6.65821	0.0203208	0	1
chr2	110560670	110560670	RGPD5,RGPD6,RGPD8	6.65821	0.0203208	1	0
chr2	130463925	130463925	POTEI	0.410284	0.0203208	1	0.75
chr2	130463928	130463928	POTEI	0.410284	0.0203208	1	0.75
chr2	131256300	131256300	POTEE	6.65821	0.0203208	1	0
chr2	240694358	240694358	AQP12A	6.65821	0.0203208	1	0
chr20	25768814	25768814	FAM182B	6.65821	0.0203208	1	0
chr20	25813453	25813453	.	6.65821	0.0203208	1	0
chr20	26551737	26551737	.	6.65821	0.0203208	1	0
chr20	26571794	26571794	.	6.65821	0.0203208	1	0
chr20	26691929	26691929	.	6.65821	0.0203208	1	0
chr20	27393014	27393014	.	-0.985786	0.0203208	0.5	1
chr20	27829273	27829273	.	-6.65821	0.0203208	0	1
chr20	28246240	28246240	.	6.65821	0.0203208	1	0
chr20	28343287	28343287	.	6.65821	0.0203208	1	0
chr20	28432008	28432008	.	6.65821	0.0203208	1	0
chr21	5019904	5019904	.	6.65821	0.0203208	1	0
chr21	6007289	6007289	.	6.65821	0.0203208	1	0
chr21	6447365	6447365	CBS,CBSL	6.65821	0.0203208	1	0
chr21	6473316	6473316	.	6.65821	0.0203208	1	0
chr21	6473319	6473319	.	6.65821	0.0203208	1	0
chr21	8212598	8212598	LOC100507412,RNA45SN2	-6.65821	0.0203208	0	1
chr21	34446120	34446120	.	6.65821	0.0203208	1	0
chr21	43409715	43409715	.	6.65821	0.0203208	1	0
chr21	43450635	43450635	LINC00319	6.65821	0.0203208	1	0
chr21	43510738	43510738	.	6.65821	0.0203208	1	0
chr21	44215829	44215829	.	6.65821	0.0203208	1	0
chr22	15591752	15591752	.	-6.65821	0.0203208	0	1
chr22	21385363	21385363	RIMBP3B,RIMBP3C	-6.65821	0.0203208	0	1
chr22	21385778	21385778	RIMBP3B,RIMBP3C	-6.65821	0.0203208	0	1
chr22	21554151	21554151	UBE2L3	6.65821	0.0203208	1	0
chr22	40537981	40537981	MRTFA	6.65821	0.0203208	1	0
chr3	91568359	91568359	.	6.65821	0.0203208	1	0
chr3	91614343	91614343	.	6.65821	0.0203208	1	0
chr3	91807532	91807532	.	6.65821	0.0203208	1	0
chr3	92015398	92015398	.	6.65821	0.0203208	1	0
chr3	92232254	92232254	.	6.65821	0.0203208	1	0
chr3	92287475	92287475	.	6.65821	0.0203208	1	0
chr3	92605445	92605445	.	6.65821	0.0203208	1	0
chr3	92631477	92631477	.	6.65821	0.0203208	1	0
chr3	92848394	92848394	.	6.65821	0.0203208	1	0
chr3	92853915	92853915	.	6.65821	0.0203208	1	0
chr3	93035247	93035247	.	6.65821	0.0203208	1	0
chr3	93471417	93471417	.	6.65821	0.0203208	1	0
chr3	93486741	93486741	.	6.65821	0.0203208	1	0
chr4	50006682	50006682	.	6.65821	0.0203208	1	0
chr4	50041539	50041539	.	6.65821	0.0203208	1	0
chr4	50192711	50192711	.	6.65821	0.0203208	1	0
chr4	50192720	50192720	.	6.65821	0.0203208	1	0
chr4	50600580	50600580	.	6.65821	0.0203208	1	0
chr4	51272276	51272276	.	-6.65821	0.0203208	0	1
chr4	51272286	51272286	.	-6.65821	0.0203208	0	1
chr4	51651384	51651384	.	-6.65821	0.0203208	0	1
chr4	69270570	69270570	.	6.65821	0.0203208	1	0
chr4	90680226	90680226	CCSER1	6.65821	0.0203208	1	0
chr5	140975	140975	PLEKHG4B	6.65821	0.0203208	1	0
chr5	15907086	15907086	FBXL7	6.65821	0.0203208	1	0
chr5	46854551	46854551	.	6.65821	0.0203208	1	0
chr5	46867179	46867179	.	6.65821	0.0203208	1	0
chr5	47195211	47195211	.	6.65821	0.0203208	1	0
chr5	63408884	63408884	.	6.65821	0.0203208	1	0
chr5	63646177	63646177	.	-0.408256	0.0203208	0.742431	0.988536
chr5	69646604	69646604	GUSBP3	6.65821	0.0203208	1	0
chr5	134467524	134467524	.	0.485852	0.0203208	0.98548	0.700847
chr5	177979464	177979464	.	-6.65821	0.0203208	0	1
chr5	181097695	181097695	.	-6.65821	0.0203208	0	1
chr6	30297748	30297748	HCG17,HCG18	0.865248	0.0203208	0.959524	0.522222
chr6	58694308	58694308	.	0.410284	0.0203208	1	0.75
chr6	59024142	59024142	.	6.65821	0.0203208	1	0
chr6	59249255	59249255	.	6.65821	0.0203208	1	0
chr6	59535631	59535631	.	6.65821	0.0203208	1	0
chr6	59673917	59673917	.	6.65821	0.0203208	1	0
chr6	59690476	59690476	.	6.65821	0.0203208	1	0
chr6	151899322	151899322	ESR1	6.65821	0.0203208	1	0
chr7	103843	103843	.	6.65821	0.0203208	1	0
chr7	56967214	56967214	.	6.65821	0.0203208	1	0
chr7	57011876	57011876	.	-0.449333	0.0203208	0.729705	1
chr7	57841046	57841046	.	6.65821	0.0203208	1	0
chr7	58480760	58480760	.	1.24317	0.0203208	1	0.416667
chr7	58584596	58584596	.	6.65821	0.0203208	1	0
chr7	58592344	58592344	.	6.65821	0.0203208	1	0
chr7	59039077	59039077	.	6.65821	0.0203208	1	0
chr7	59162221	59162221	.	6.65821	0.0203208	1	0
chr7	59283524	59283524	.	6.65821	0.0203208	1	0
chr7	59407133	59407133	.	6.65821	0.0203208	1	0
chr7	59497605	59497605	.	6.65821	0.0203208	1	0
chr7	59564559	59564559	.	6.65821	0.0203208	1	0
chr7	59564568	59564568	.	6.65821	0.0203208	1	0
chr7	60088186	60088186	.	6.65821	0.0203208	1	0
chr7	60541331	60541331	.	6.65821	0.0203208	1	0
chr7	60671631	60671631	.	6.65821	0.0203208	1	0
chr7	60760869	60760869	.	6.65821	0.0203208	1	0
chr7	60817644	60817644	.	-6.65821	0.0203208	0	1
chr7	60827184	60827184	.	6.65821	0.0203208	1	0
chr7	60887498	60887498	.	6.65821	0.0203208	1	0
chr7	61218175	61218175	.	6.65821	0.0203208	1	0
chr7	61588825	61588825	.	6.65821	0.0203208	1	0
chr7	72987805	72987805	.	6.65821	0.0203208	1	0
chr7	73279504	73279504	.	-6.65821	0.0203208	0	1
chr7	74738280	74738280	GTF2I	-6.65821	0.0203208	0	1
chr7	74850779	74850779	GTF2IRD2	-6.65821	0.0203208	0	1
chr7	102561207	102561207	POLR2J3,SPDYE2,SPDYE2B	6.65821	0.0203208	1	0
chr7	144342234	144342234	ARHGEF35-AS1,OR2A1-AS1	6.65821	0.0203208	1	0
chr8	82773	82773	LOC101927506	6.65821	0.0203208	1	0
chr8	7460538	7460538	SPAG11A,SPAG11B	6.65821	0.0203208	1	0
chr8	12166071	12166071	.	6.65821	0.0203208	1	0
chr8	44730417	44730417	.	-6.65821	0.0203208	0	1
chr8	45387776	45387776	.	6.65821	0.0203208	1	0
chr8	45523863	45523863	.	6.65821	0.0203208	1	0
chr8	45862720	45862720	.	0.985786	0.0203208	1	0.5
chr8	128825583	128825583	.	6.65821	0.0203208	1	0
chr9	41857327	41857327	.	6.65821	0.0203208	1	0
chr9	44429754	44429754	.	6.65821	0.0203208	1	0
chr9	45132625	45132625	.	-6.65821	0.0203208	0	1
chr9	45373946	45373946	.	6.65821	0.0203208	1	0
chr9	61094702	61094702	.	6.65821	0.0203208	1	0
chr9	61168465	61168465	.	6.65821	0.0203208	1	0
chr9	61462043	61462043	.	6.65821	0.0203208	1	0
chr9	61941984	61941984	.	6.65821	0.0203208	1	0
chr9	63434970	63434970	.	0.701432	0.0203208	1	0.611111
chr9	63475225	63475225	.	-6.65821	0.0203208	0	1
chr9	67521781	67521781	.	6.65821	0.0203208	1	0
chr9	110792985	110792985	MUSK	6.65821	0.0203208	1	0
chr9	113067537	113067537	.	-6.65821	0.0203208	0	1
chr1	226115077	226115077	.	0.577838	0.0196182	1	0.666667
chr10	41331953	41331953	.	0.577838	0.0196182	1	0.666667
chr7	63616725	63616725	.	0.577838	0.0196182	1	0.666667
chr9	113109655	113109655	FAM225B	-0.577838	0.0196182	0.666667	1
chr9	136981679	136981679	PTGDS	0.42833	0.0189563	0.983165	0.728042
chr1	206333183	206333183	SRGAP2	0.368423	0.0152425	0.98548	0.761127
chr17	24481690	24481690	.	-3.80023	0.0137197	0.0625	1
chr1	98512971	98512971	.	0.985786	0.0129281	1	0.5
chr1	121210740	121210740	SRGAP2C	0.985786	0.0129281	1	0.5
chr1	121931766	121931766	.	0.985786	0.0129281	1	0.5
chr15	28558461	28558461	LOC100132202	0.985786	0.0129281	1	0.5
chr16	32437758	32437758	.	0.985786	0.0129281	1	0.5
chr16	37655728	37655728	.	0.985786	0.0129281	1	0.5
chr17	25481308	25481308	.	0.985786	0.0129281	1	0.5
chr17	43259243	43259243	.	0.985786	0.0129281	1	0.5
chr20	27491649	27491649	.	5.67243	0.0129281	0.5	0
chr20	63652576	63652576	STMN3	-5.67243	0.0129281	0	0.5
chr4	50262093	50262093	.	0.985786	0.0129281	1	0.5
chr5	70503198	70503198	GUSBP15,GUSBP3	0.985786	0.0129281	1	0.5
chr6	59722451	59722451	.	-0.985786	0.0129281	0.5	1
chr6	59722463	59722463	.	-0.985786	0.0129281	0.5	1
chr7	59967380	59967380	.	0.985786	0.0129281	1	0.5
chr7	65135626	65135626	.	0.985786	0.0129281	1	0.5
chr7	73236992	73236992	.	-5.67243	0.0129281	0	0.5
chr7	73237001	73237001	.	-5.67243	0.0129281	0	0.5
chr8	44864983	44864983	.	0.985786	0.0129281	1	0.5
chr1	148825962	148825962	PDE4DIP	0.287009	0.00971446	1	0.817795
chr10	39570431	39570431	.	-0.104204	0.00896515	0.929621	1
chr7	63616733	63616733	.	1.55667	0.00890726	1	0.333333
chr9	84393211	84393211	.	0.585566	0.00890615	0.983193	0.651852
chr1	45497679	45497679	CCDC163	-6.65821	0.0086745	0	1
chr1	103603969	103603969	.	6.65821	0.0086745	1	0
chr1	121971407	121971407	.	-6.65821	0.0086745	0	1
chr1	124792869	124792869	.	-0.351729	0.0086745	0.781481	1
chr1	149321669	149321669	.	6.65821	0.0086745	1	0
chr10	41498093	41498093	.	-6.65821	0.0086745	0	1
chr10	133685371	133685371	.	6.65821	0.0086745	1	0
chr12	35713633	35713633	.	6.65821	0.0086745	1	0
chr12	36868525	36868525	.	-6.65821	0.0086745	0	1
chr12	37101130	37101130	.	6.65821	0.0086745	1	0
chr14	18633188	18633188	LINC02297	6.65821	0.0086745	1	0
chr14	45389749	45389749	.	6.65821	0.0086745	1	0
chr15	18924032	18924032	.	-6.65821	0.0086745	0	1
chr15	19367289	19367289	.	6.65821	0.0086745	1	0
chr15	21889907	21889907	.	6.65821	0.0086745	1	0
chr15	28575517	28575517	HERC2P11	6.65821	0.0086745	1	0
chr15	84263868	84263868	.	6.65821	0.0086745	1	0
chr16	14945796	14945796	NPIPA1,PKD1P3-NPIPA1	6.65821	0.0086745	1	0
chr16	32137239	32137239	.	6.65821	0.0086745	1	0
chr16	32771212	32771212	.	6.65821	0.0086745	1	0
chr16	34413043	34413043	.	6.65821	0.0086745	1	0
chr16	34497350	34497350	.	6.65821	0.0086745	1	0
chr16	35005200	35005200	.	6.65821	0.0086745	1	0
chr16	36478775	36478775	.	6.65821	0.0086745	1	0
chr16	36705663	36705663	.	6.65821	0.0086745	1	0
chr16	36846340	36846340	.	-6.65821	0.0086745	0	1
chr16	37117525	37117525	.	6.65821	0.0086745	1	0
chr16	37180013	37180013	.	-6.65821	0.0086745	0	1
chr16	37352532	37352532	.	-6.65821	0.0086745	0	1
chr16	37476122	37476122	.	6.65821	0.0086745	1	0
chr16	37501203	37501203	.	6.65821	0.0086745	1	0
chr16	38145588	38145588	.	-6.65821	0.0086745	0	1
chr16	38160509	38160509	.	6.65821	0.0086745	1	0
chr17	287326	287326	RPH3AL	6.65821	0.0086745	1	0
chr17	23268794	23268794	.	6.65821	0.0086745	1	0
chr17	23299875	23299875	.	6.65821	0.0086745	1	0
chr17	23466060	23466060	.	-6.65821	0.0086745	0	1
chr17	24883468	24883468	.	6.65821	0.0086745	1	0
chr17	25049788	25049788	.	6.65821	0.0086745	1	0
chr17	25455123	25455123	.	6.65821	0.0086745	1	0
chr17	25559299	25559299	.	-6.65821	0.0086745	0	1
chr17	25567517	25567517	.	-6.65821	0.0086745	0	1
chr17	25994771	25994771	.	-6.65821	0.0086745	0	1
chr17	26427919	26427919	.	6.65821	0.0086745	1	0
chr17	26427929	26427929	.	6.65821	0.0086745	1	0
chr18	20337972	20337972	.	6.65821	0.0086745	1	0
chr19	8656392	8656392	NFILZ	-6.65821	0.0086745	0	1
chr2	26665536	26665536	.	6.65821	0.0086745	1	0
chr2	91820876	91820876	.	6.65821	0.0086745	1	0
chr2	92428927	92428927	.	6.65821	0.0086745	1	0
chr2	92826589	92826589	.	-6.65821	0.0086745	0	1
chr2	97364918	97364918	.	6.65821	0.0086745	1	0
chr2	157570207	157570207	ACVR1C	-6.65821	0.0086745	0	1
chr20	26816847	26816847	.	6.65821	0.0086745	1	0
chr20	27001664	27001664	.	6.65821	0.0086745	1	0
chr20	27151996	27151996	.	-6.65821	0.0086745	0	1
chr21	5014033	5014033	.	6.65821	0.0086745	1	0
chr21	6122220	6122220	SIK1,SIK1B	6.65821	0.0086745	1	0
chr21	6334939	6334939	.	6.65821	0.0086745	1	0
chr21	8252768	8252768	RNA28SN5	-6.65821	0.0086745	0	1
chr21	43432086	43432086	.	-6.65821	0.0086745	0	1
chr21	43450270	43450270	LINC00319	-6.65821	0.0086745	0	1
chr22	43280471	43280471	SCUBE1,SCUBE1-AS1	-6.65821	0.0086745	0	1
chr3	11525	11525	.	6.65821	0.0086745	1	0
chr3	91793593	91793593	.	-6.65821	0.0086745	0	1
chr3	92312703	92312703	.	6.65821	0.0086745	1	0
chr3	93560204	93560204	.	-6.65821	0.0086745	0	1
chr3	93648907	93648907	.	-6.65821	0.0086745	0	1
chr3	95784248	95784248	.	-6.65821	0.0086745	0	1
chr4	9235647	9235647	USP17L15	-6.65821	0.0086745	0	1
chr4	50669269	50669269	.	-6.65821	0.0086745	0	1
chr5	177924928	177924928	.	6.65821	0.0086745	1	0
chr6	26720372	26720372	.	-6.65821	0.0086745	0	1
chr6	32595673	32595673	.	-6.65821	0.0086745	0	1
chr6	59301918	59301918	.	6.65821	0.0086745	1	0
chr7	4343075	4343075	.	-6.65821	0.0086745	0	1
chr7	30443954	30443954	NOD1	6.65821	0.0086745	1	0
chr7	57833091	57833091	.	6.65821	0.0086745	1	0
chr7	58480795	58480795	.	6.65821	0.0086745	1	0
chr7	58994198	58994198	.	-0.43666	0.0086745	0.736231	1
chr7	59259579	59259579	.	-6.65821	0.0086745	0	1
chr7	59396089	59396089	.	6.65821	0.0086745	1	0
chr7	59734302	59734302	.	6.65821	0.0086745	1	0
chr7	60020839	60020839	.	6.65821	0.0086745	1	0
chr7	61486590	61486590	.	6.65821	0.0086745	1	0
chr7	63353351	63353351	.	6.65821	0.0086745	1	0
chr7	63353364	63353364	.	6.65821	0.0086745	1	0
chr7	63392475	63392475	.	6.65821	0.0086745	1	0
chr7	63551435	63551435	.	6.65821	0.0086745	1	0
chr7	65531116	65531116	LOC101929322	6.65821	0.0086745	1	0
chr7	73003923	73003923	STAG3L3	6.65821	0.0086745	1	0
chr7	143806086	143806086	TCAF2	6.65821	0.0086745	1	0
chr7	144365034	144365034	ARHGEF34P,ARHGEF5	6.65821	0.0086745	1	0
chr7	158334313	158334313	PTPRN2	6.65821	0.0086745	1	0
chr7	158426196	158426196	PTPRN2	-6.65821	0.0086745	0	1
chr8	63340	63340	.	6.65821	0.0086745	1	0
chr8	676144	676144	ERICH1	6.65821	0.0086745	1	0
chr8	44060378	44060378	.	6.65821	0.0086745	1	0
chr8	45150452	45150452	.	6.65821	0.0086745	1	0
chr8	45419570	45419570	.	-6.65821	0.0086745	0	1
chr8	45591687	45591687	.	6.65821	0.0086745	1	0
chr9	43706203	43706203	.	6.65821	0.0086745	1	0
chr9	62598673	62598673	.	6.65821	0.0086745	1	0
chr6	32505839	32505839	.	-0.287729	0.00855891	0.817383	1
chr12	129576020	129576020	TMEM132D	0.224974	0.00848121	1	0.854167
chr22	18616992	18616992	.	0.262082	0.0084716	1	0.832222
chr1	122428141	122428141	.	6.65821	0.00765712	1	0
chr1	144312918	144312918	LOC105371215	6.65821	0.00765712	1	0
chr1	228619189	228619189	.	6.65821	0.00765712	1	0
chr11	23508236	23508236	.	0.102489	0.00765712	0.972222	0.904866
chr11	51136545	51136545	.	6.65821	0.00765712	1	0
chr15	17160508	17160508	.	6.65821	0.00765712	1	0
chr15	17373289	17373289	.	6.65821	0.00765712	1	0
chr16	36805876	36805876	.	6.65821	0.00765712	1	0
chr17	23493039	23493039	.	6.65821	0.00765712	1	0
chr17	23765884	23765884	.	6.65821	0.00765712	1	0
chr17	23898905	23898905	.	6.65821	0.00765712	1	0
chr18	16364761	16364761	.	-6.65821	0.00765712	0	1
chr18	18699096	18699096	.	-6.65821	0.00765712	0	1
chr18	57510503	57510503	.	6.65821	0.00765712	1	0
chr18	79584136	79584136	LOC284240	-6.65821	0.00765712	0	1
chr2	89577643	89577643	LOC107985911	6.65821	0.00765712	1	0
chr20	28223600	28223600	.	-0.669527	0.00765712	0.625	1
chr21	5121180	5121180	GATD3A,GATD3B	6.65821	0.00765712	1	0
chr22	15426968	15426968	.	-6.65821	0.00765712	0	1
chr22	16013722	16013722	.	-6.65821	0.00765712	0	1
chr3	91634011	91634011	.	-6.65821	0.00765712	0	1
chr4	50096301	50096301	.	-6.65821	0.00765712	0	1
chr4	50561666	50561666	.	-6.65821	0.00765712	0	1
chr4	190069007	190069007	.	6.65821	0.00765712	1	0
chr5	484331	484331	SLC9A3	6.65821	0.00765712	1	0
chr5	46811106	46811106	.	6.65821	0.00765712	1	0
chr5	46853035	46853035	.	-6.65821	0.00765712	0	1
chr6	59642177	59642177	.	-6.65821	0.00765712	0	1
chr7	58343317	58343317	.	-6.65821	0.00765712	0	1
chr7	59757130	59757130	.	-6.65821	0.00765712	0	1
chr7	65540211	65540211	LOC101929322	-6.65821	0.00765712	0	1
chr8	43979954	43979954	.	-6.65821	0.00765712	0	1
chr9	65839832	65839832	LOC101928195,LOC101929583,LOC105379443	-6.65821	0.00765712	0	1
chr9	131357238	131357238	.	6.65821	0.00765712	1	0
chr1	2665736	2665736	TTC34	5.8049	0.00678946	0.549048	0
chr1	152213383	152213383	HRNR	6.62936	0.0066344	0.98	0
chr7	58313250	58313250	.	0.554341	0.00650935	1	0.677778
chr7	59222042	59222042	.	0.316406	0.006279	1	0.801099
chr12	36385030	36385030	.	0.363591	0.00616186	1	0.775
chr7	117207167	117207167	ST7,ST7-OT3	0.0588066	0.00609196	0.980769	0.941196
chr18	18559598	18559598	.	0.570865	0.00582581	0.984127	0.659259
chr6	73157948	73157948	KCNQ5	-0.145185	0.00527693	0.873164	0.966667
chr15	19223844	19223844	.	0.49163	0.00523758	1	0.708333
chr19	37691893	37691893	ZNF781	1.5559	0.00523758	0.0847388	0.0222222
chr5	91204381	91204381	.	-0.169627	0.005094	0.887963	1
chr4	171458159	171458159	.	0.158144	0.00484058	1	0.895139
chr15	55815832	55815832	.	0.410284	0.00474197	1	0.75
chr7	108256018	108256018	NRCAM	0.410284	0.00474197	1	0.75
chr9	44658694	44658694	.	0.410284	0.00474197	1	0.75
chr9	42706577	42706577	.	-0.242306	0.00455955	0.843847	1
chr1	12244676	12244676	VPS13D	-0.0554461	0.00452588	0.94547	0.982906
chr4	170210365	170210365	.	-0.137546	0.00431611	0.882903	0.972222
chr5	47285070	47285070	.	-0.688585	0.00377292	0.616667	1
chr18	20410982	20410982	.	0.577838	0.00356186	1	0.666667
chr18	8828159	8828159	MTCL1	-0.0869933	0.00324131	0.924804	0.982906
chr7	63498641	63498641	.	6.59178	0.00314073	0.954545	0
chr2	110029059	110029059	.	1.24317	0.00309354	1	0.416667
chr9	42702788	42702788	.	-0.450218	0.00284292	0.729252	1
chr15	19193179	19193179	.	0.985786	0.00273428	1	0.5
chr16	37384604	37384604	.	0.985786	0.00273428	1	0.5
chr21	8212581	8212581	LOC100507412,RNA45SN2	-5.67243	0.00273428	0	0.5
chr3	93556609	93556609	.	0.985786	0.00273428	1	0.5
chr8	45733756	45733756	.	0.985786	0.00273428	1	0.5
chr8	45733765	45733765	.	0.985786	0.00273428	1	0.5
chr11	48400285	48400285	.	0.300974	0.00273051	1	0.809821
chr7	109038733	109038733	.	0.121279	0.00249369	0.982456	0.902437
chr4	143510767	143510767	.	-0.130959	0.00247201	0.895445	0.981481
chr6	116816851	116816851	GPRC6A	0.131736	0.0024424	0.983333	0.896647
chr1	2746873	2746873	TTC34	-6.65821	0.00233483	0	1
chr1	21482765	21482765	NBPF3	6.65821	0.00233483	1	0
chr1	51711501	51711501	OSBPL9	6.65821	0.00233483	1	0
chr1	121970086	121970086	.	6.65821	0.00233483	1	0
chr1	122200736	122200736	.	6.65821	0.00233483	1	0
chr1	144077423	144077423	.	-6.65821	0.00233483	0	1
chr1	144782382	144782382	SRGAP2-AS1	6.65821	0.00233483	1	0
chr10	346854	346854	DIP2C	6.65821	0.00233483	1	0
chr10	46349628	46349628	AGAP14P	6.65821	0.00233483	1	0
chr11	4335149	4335149	.	6.65821	0.00233483	1	0
chr11	48425285	48425285	.	6.65821	0.00233483	1	0
chr11	48425287	48425287	.	6.65821	0.00233483	1	0
chr11	89989195	89989195	TRIM51EP	-6.65821	0.00233483	0	1
chr12	35928668	35928668	.	-6.65821	0.00233483	0	1
chr12	36285845	36285845	.	6.65821	0.00233483	1	0
chr12	41844405	41844405	.	6.65821	0.00233483	1	0
chr12	112194537	112194537	HECTD4	-0.0624054	0.00233483	0.947854	0.990196
chr14	64895810	64895810	.	-6.65821	0.00233483	0	1
chr15	20080442	20080442	.	6.65821	0.00233483	1	0
chr15	32475574	32475574	.	6.65821	0.00233483	1	0
chr15	57346100	57346100	.	0.0899657	0.00233483	0.986842	0.926578
chr16	2564384	2564384	PDPK1	6.65821	0.00233483	1	0
chr16	18518668	18518668	NOMO2	-6.65821	0.00233483	0	1
chr16	36379461	36379461	.	6.65821	0.00233483	1	0
chr16	37503733	37503733	.	6.65821	0.00233483	1	0
chr16	38130066	38130066	.	0.985786	0.00233483	1	0.5
chr16	89192982	89192982	CDH15	-6.65821	0.00233483	0	1
chr17	20506148	20506148	.	6.65821	0.00233483	1	0
chr17	32083599	32083599	.	-6.65821	0.00233483	0	1
chr18	17509454	17509454	.	6.65821	0.00233483	1	0
chr18	17692497	17692497	.	6.65821	0.00233483	1	0
chr18	18517746	18517746	.	6.65821	0.00233483	1	0
chr18	19578191	19578191	.	6.65821	0.00233483	1	0
chr19	7040300	7040300	.	-6.65821	0.00233483	0	1
chr19	38743573	38743573	CAPN12	6.65821	0.00233483	1	0
chr2	92098764	92098764	.	6.65821	0.00233483	1	0
chr2	97301048	97301048	.	6.65821	0.00233483	1	0
chr2	170066704	170066704	UBR3	0.508999	0.00233483	1	0.699737
chr2	240694341	240694341	AQP12A	6.65821	0.00233483	1	0
chr20	24618349	24618349	SYNDIG1	6.65821	0.00233483	1	0
chr20	25843923	25843923	.	6.65821	0.00233483	1	0
chr20	25844014	25844014	.	6.65821	0.00233483	1	0
chr20	26025425	26025425	.	6.65821	0.00233483	1	0
chr20	26792969	26792969	.	6.65821	0.00233483	1	0
chr20	26985791	26985791	.	6.65821	0.00233483	1	0
chr20	27101051	27101051	.	6.65821	0.00233483	1	0
chr20	27191352	27191352	.	6.65821	0.00233483	1	0
chr20	28107908	28107908	.	0.985786	0.00233483	1	0.5
chr21	5032880	5032880	ICOSLG,LOC102723996	6.65821	0.00233483	1	0
chr21	5062115	5062115	.	6.65821	0.00233483	1	0
chr21	6073362	6073362	LINC00313,LINC01669	-6.65821	0.00233483	0	1
chr21	6315786	6315786	.	6.65821	0.00233483	1	0
chr21	6827785	6827785	.	6.65821	0.00233483	1	0
chr21	7555626	7555626	.	6.65821	0.00233483	1	0
chr21	7607080	7607080	.	-6.65821	0.00233483	0	1
chr21	8242643	8242643	RNA28SN5	-6.65821	0.00233483	0	1
chr21	44228232	44228232	ICOSLG,LOC102723996	0.985786	0.00233483	1	0.5
chr22	10526629	10526629	.	6.65821	0.00233483	1	0
chr3	89463572	89463572	EPHA3	6.65821	0.00233483	1	0
chr3	91689297	91689297	.	6.65821	0.00233483	1	0
chr3	92162523	92162523	.	6.65821	0.00233483	1	0
chr3	92231539	92231539	.	6.65821	0.00233483	1	0
chr3	92738571	92738571	.	6.65821	0.00233483	1	0
chr3	93564361	93564361	.	6.65821	0.00233483	1	0
chr3	93622208	93622208	.	6.65821	0.00233483	1	0
chr4	131740788	131740788	.	6.65821	0.00233483	1	0
chr4	131760345	131760345	.	6.65821	0.00233483	1	0
chr5	17523158	17523158	.	6.65821	0.00233483	1	0
chr6	26700404	26700404	.	6.65821	0.00233483	1	0
chr6	58768750	58768750	.	6.65821	0.00233483	1	0
chr6	58978892	58978892	.	6.65821	0.00233483	1	0
chr6	58978909	58978909	.	6.65821	0.00233483	1	0
chr6	59017851	59017851	.	6.65821	0.00233483	1	0
chr6	59679665	59679665	.	-6.65821	0.00233483	0	1
chr6	158240162	158240162	.	6.65821	0.00233483	1	0
chr7	57004324	57004324	.	6.65821	0.00233483	1	0
chr7	58572248	58572248	.	-6.65821	0.00233483	0	1
chr7	58867192	58867192	.	6.65821	0.00233483	1	0
chr7	59081141	59081141	.	6.65821	0.00233483	1	0
chr7	60255502	60255502	.	6.65821	0.00233483	1	0
chr7	63424608	63424608	.	6.65821	0.00233483	1	0
chr7	63424613	63424613	.	6.65821	0.00233483	1	0
chr7	63557305	63557305	.	6.65821	0.00233483	1	0
chr7	75185679	75185679	GTF2IP1	-6.65821	0.00233483	0	1
chr7	100997587	100997587	MUC12	6.65821	0.00233483	1	0
chr7	140035902	140035902	PARP12	-6.65821	0.00233483	0	1
chr8	11986248	11986248	.	2.42739	0.00233483	0.203176	0.0296296
chr8	44387985	44387985	.	6.65821	0.00233483	1	0
chr8	44409372	44409372	.	6.65821	0.00233483	1	0
chr8	45524192	45524192	.	6.65821	0.00233483	1	0
chr9	44658721	44658721	.	0.985786	0.00233483	1	0.5
chr9	44900809	44900809	.	6.65821	0.00233483	1	0
chr9	45113239	45113239	.	6.65821	0.00233483	1	0
chr9	45188757	45188757	.	6.65821	0.00233483	1	0
chr9	61094696	61094696	.	6.65821	0.00233483	1	0
chr9	61096710	61096710	.	6.65821	0.00233483	1	0
chr9	64549639	64549639	.	6.65821	0.00233483	1	0
chr9	64666146	64666146	LOC100996643,LOC101928195,LOC101929583,LOC105379443	6.65821	0.00233483	1	0
chr9	67128103	67128103	CNTNAP3P2	6.65821	0.00233483	1	0
chr16	22637390	22637390	.	-0.128091	0.00218786	0.903299	0.988095
chr6	45834338	45834338	.	-0.0975654	0.00217424	0.920974	0.986111
chr6	58838987	58838987	.	-0.486062	0.00215159	0.711111	1
chr11	117136910	117136910	.	-0.126024	0.0020288	0.915517	1
chr2	214965164	214965164	ABCA12	0.106326	0.00200462	0.988889	0.917919
chr7	56999026	56999026	.	-1.24337	0.00197587	0.416608	1
chr19	53862306	53862306	.	-0.16344	0.00178219	0.882803	0.989899
chr13	93140572	93140572	.	-0.183195	0.0016793	0.861765	0.979798
chr6	59505817	59505817	.	0.985786	0.00162961	1	0.5
chr17	18333534	18333534	SHMT1	0.172966	0.00149133	1	0.885888
chr7	57004516	57004516	.	0.25307	0.00139371	1	0.8375
chr1	122072672	122072672	.	0.410284	0.0013791	1	0.75
chr1	171348207	171348207	.	0.119007	0.0013791	0.989583	0.910437
chr19	36267572	36267572	.	0.135955	0.00135802	0.989583	0.899688
chr2	121615656	121615656	CLASP1	-0.0895704	0.00135802	0.931742	0.992063
chr1	25323069	25323069	RHD,RSRP1	0.312014	0.00134637	1	0.803571
chr8	124281333	124281333	.	0.112714	0.00129493	0.989583	0.914461
chr5	180236335	180236335	MAPK9	0.0994595	0.00125922	0.992063	0.925309
chr22	18581366	18581366	.	-0.344993	0.00125251	0.785185	1
chr7	20245470	20245470	.	0.141534	0.00125251	0.988095	0.894828
chr17	3689426	3689426	P2RX5,P2RX5-TAX1BP3	-0.324926	0.00123297	0.796323	1
chr22	21132973	21132973	.	0.985786	0.00123297	1	0.5
chr10	79243518	79243518	ZMIZ1	2.77645	0.00118977	0.167273	0.015873
chr15	97318973	97318973	.	-0.147251	0.00117473	0.891438	0.988304
chr6	27683756	27683756	.	-0.132701	0.00113429	0.900575	0.988304
chr3	112669338	112669338	.	-0.137002	0.0011173	0.895871	0.986111
chr12	129799003	129799003	TMEM132D	0.135002	0.00111563	0.988889	0.899657
chr1	246173607	246173607	SMYD3	-0.143049	0.00110547	0.892821	0.986928
chr9	113085282	113085282	.	-0.794713	0.0010913	0.572222	1
chr9	93912784	93912784	.	-0.205566	0.00109107	0.851047	0.982906
chr6	138146762	138146762	.	-0.126721	0.00106911	0.905378	0.989418
chr19	1128581	1128581	SBNO2	-0.101161	0.00105748	0.922973	0.990741
chr5	178822640	178822640	.	-0.141694	0.00105748	0.897126	0.990741
chr1	2673421	2673421	TTC34	-0.190791	0.0010334	0.874887	1
chr5	1331374	1331374	CLPTM1L	0.0944893	0.0010334	0.992424	0.928874
chr17	37253284	37253284	ACACA	0.110292	0.0010287	0.990741	0.917087
chr7	140190301	140190301	.	0.225519	0.00101573	1	0.85384
chr10	85587002	85587002	GRID1-AS1	0.176459	0.00100372	1	0.883721
chr2	32358283	32358283	BIRC6	-2.09529	0.00098292	0.00595238	0.0581663
chr11	30582242	30582242	MPPED2	0.106493	0.000949585	0.991667	0.920391
chr12	61286024	61286024	.	0.196634	0.00094086	1	0.87131
chr6	32522266	32522266	HLA-DRB5	0.509674	0.00094086	1	0.699405
chr2	174748651	174748651	CHRNA1	-0.113946	0.000934409	0.915692	0.99177
chr12	64936193	64936193	LINC02231,LINC02389	-0.107795	0.000923697	0.919647	0.99177
chr10	12641258	12641258	CAMK1D	-0.0922032	0.00091374	0.930025	0.992063
chr4	88618007	88618007	HERC3	0.170707	0.000913128	1	0.887291
chr11	35455039	35455039	PAMR1	0.128513	0.000906247	1	0.913922
chr2	98754869	98754869	.	-0.0897211	0.000897163	0.931643	0.992063
chr13	43639751	43639751	ENOX1	-0.110565	0.000896554	0.916911	0.990741
chr6	169078591	169078591	.	-0.170254	0.000888889	0.887573	1
chr8	2655617	2655617	LOC101927815	0.102894	0.000888889	1	0.930475
chr11	48462740	48462740	.	0.101721	0.000873455	0.992424	0.92418
chr8	100317311	100317311	RNF19A	0.118107	0.000864932	1	0.92061
chr1	201143862	201143862	TMEM9	0.130312	0.00086128	1	0.91277
chr1	62611561	62611561	DOCK7	0.10245	0.000858137	1	0.930764
chr1	200321689	200321689	.	0.0934153	0.000858137	1	0.936674
chr21	15086674	15086674	.	0.108636	0.000858137	1	0.926739
chr9	31460012	31460012	.	-0.10878	0.000855993	0.91872	0.991453
chr10	34226504	34226504	PARD3	0.0946796	0.000828526	1	0.935845
chr19	615948	615948	HCN2	3.14886	0.000828526	0.0786957	0
chr19	42368857	42368857	MEGF8	-0.182516	0.000828526	0.869098	0.987654
chr5	135135653	135135653	C5orf66	-0.126418	0.000828526	0.906782	0.990741
chr6	14828730	14828730	.	0.136374	0.000828526	1	0.908901
chr6	49724164	49724164	.	0.146846	0.000828526	1	0.902255
chr3	196637935	196637935	.	0.0988078	0.000825007	1	0.933142
chr1	30191856	30191856	.	0.178998	0.000822041	1	0.88215
chr11	36408194	36408194	PRR5L	0.105083	0.000822041	1	0.929049
chr19	40318997	40318997	.	0.092964	0.000822041	1	0.93697
chr22	50706714	50706714	SHANK3	0.0967752	0.000822041	1	0.934472
chr3	90016641	90016641	.	0.121928	0.000822041	1	0.918149
chr4	126767465	126767465	.	0.145404	0.000822041	1	0.903167
chr5	81317450	81317450	.	0.18703	0.000822041	1	0.877197
chr9	128053193	128053193	.	-0.160888	0.000822041	0.893419	1
chr4	183130209	183130209	WWC2	0.126699	0.00082069	1	0.915084
chr2	915626	915626	.	-0.105182	0.000818405	0.928985	1
chr1	13071905	13071905	.	-6.65821	0.000815966	0	1
chr1	14654013	14654013	KAZN	-0.112374	0.000815966	0.916409	0.991453
chr1	27216573	27216573	.	-0.109996	0.000815966	0.925857	1
chr1	58074654	58074654	DAB1	0.260407	0.000815966	1	0.833201
chr1	77852104	77852104	MIGA1	0.148416	0.000815966	1	0.901263
chr1	84831332	84831332	LPAR3	-0.156439	0.000815966	0.889563	0.992593
chr1	121693303	121693303	.	6.65821	0.000815966	1	0
chr1	121726772	121726772	.	-6.65821	0.000815966	0	1
chr1	122086748	122086748	.	6.65821	0.000815966	1	0
chr1	124709615	124709615	.	-0.443773	0.000815966	0.732561	1
chr1	149824471	149824471	.	6.65821	0.000815966	1	0
chr1	228316743	228316743	OBSCN	-0.291516	0.000815966	0.815214	1
chr1	228645981	228645981	DUSP5P1,RHOU	6.65821	0.000815966	1	0
chr1	228645989	228645989	DUSP5P1,RHOU	6.65821	0.000815966	1	0
chr10	39755481	39755481	.	6.65821	0.000815966	1	0
chr10	40582718	40582718	.	6.65821	0.000815966	1	0
chr10	68456477	68456477	DNA2	0.0667011	0.000815966	1	0.954367
chr10	73030709	73030709	P4HA1	-0.0996035	0.000815966	0.932622	1
chr10	127536375	127536375	.	-0.17103	0.000815966	0.887091	1
chr10	131915988	131915988	PPP2R2D	0.0666459	0.000815966	1	0.954404
chr11	47752530	47752530	FNBP4	-0.104431	0.000815966	0.929474	1
chr11	64273663	64273663	BAD,GPR137	0.131079	0.000815966	1	0.91228
chr12	7815865	7815865	SLC2A14	-0.201551	0.000815966	0.868311	1
chr12	37101139	37101139	.	6.65821	0.000815966	1	0
chr12	53461897	53461897	PCBP2	-0.089278	0.000815966	0.939393	1
chr12	70337998	70337998	CNOT2	0.110386	0.000815966	1	0.925603
chr12	76517592	76517592	OSBPL8	0.0797803	0.000815966	1	0.945664
chr13	66583350	66583350	PCDH9	-0.133512	0.000815966	0.90349	0.992063
chr15	25274667	25274667	SNHG14	-0.140694	0.000815966	0.906153	1
chr15	28663985	28663985	HERC2P9	6.65821	0.000815966	1	0
chr15	55704764	55704764	PRTG	-0.165896	0.000815966	0.890289	1
chr15	73104099	73104099	NEO1	0.0977918	0.000815966	0.994792	0.92894
chr15	75791535	75791535	.	-0.0879773	0.000815966	0.940249	1
chr16	2011758	2011758	.	-0.130571	0.000815966	0.912604	1
chr16	16225845	16225845	.	-6.65821	0.000815966	0	1
chr16	18353990	18353990	.	-6.65821	0.000815966	0	1
chr16	36610802	36610802	.	6.65821	0.000815966	1	0
chr16	37197862	37197862	.	6.65821	0.000815966	1	0
chr16	37383411	37383411	.	6.65821	0.000815966	1	0
chr16	37929238	37929238	.	-6.65821	0.000815966	0	1
chr16	38079600	38079600	.	6.65821	0.000815966	1	0
chr16	88915617	88915617	CBFA2T3	6.65821	0.000815966	1	0
chr16	89288017	89288017	ANKRD11	0.0915078	0.000815966	1	0.937927
chr17	1310690	1310690	.	6.65821	0.000815966	1	0
chr17	9096572	9096572	NTN1	0.0983792	0.000815966	1	0.933423
chr17	24185935	24185935	.	0.928024	0.000815966	1	0.520833
chr17	26116851	26116851	.	6.65821	0.000815966	1	0
chr17	26427910	26427910	.	6.65821	0.000815966	1	0
chr17	26552053	26552053	.	-6.65821	0.000815966	0	1
chr17	27314688	27314688	WSB1	0.0832654	0.000815966	0.995833	0.939425
chr17	37436867	37436867	TADA2A	0.132039	0.000815966	1	0.911666
chr17	47490714	47490714	MRPL45P2	-0.117523	0.000815966	0.920987	1
chr18	837211	837211	.	-6.65821	0.000815966	0	1
chr18	2504272	2504272	.	-0.0974781	0.000815966	0.934012	1
chr18	17828083	17828083	.	6.65821	0.000815966	1	0
chr18	20076428	20076428	.	-0.305929	0.000815966	0.807011	1
chr18	24306888	24306888	OSBPL1A	0.0877954	0.000815966	1	0.940369
chr18	78365738	78365738	.	-0.176355	0.000815966	0.883785	1
chr19	1035794	1035794	CNN2	0.115534	0.000815966	0.994048	0.916777
chr19	17164661	17164661	MYO9B	0.0922021	0.000815966	1	0.937471
chr19	17937173	17937173	CCDC124	-0.161673	0.000815966	0.88465	0.990741
chr19	46405218	46405218	.	3.40894	0.000815966	0.0962171	0
chr19	47936161	47936161	.	-6.65821	0.000815966	0	1
chr2	94019969	94019969	.	6.65821	0.000815966	1	0
chr2	96036450	96036450	.	6.65821	0.000815966	1	0
chr2	108930603	108930603	EDAR	0.213995	0.000815966	1	0.860768
chr2	130503590	130503590	POTEI	6.65821	0.000815966	1	0
chr2	135980266	135980266	DARS1	0.151772	0.000815966	1	0.899146
chr2	168958340	168958340	ABCB11	-0.122695	0.000815966	0.917655	1
chr2	175993665	175993665	LNPK	0.112717	0.000815966	1	0.924093
chr2	200660019	200660019	AOX1	0.128362	0.000815966	1	0.914018
chr2	240605189	240605189	.	-0.0887517	0.000815966	0.939739	1
chr2	241497864	241497864	STK25	0.171071	0.000815966	1	0.887065
chr20	6047683	6047683	LRRN4	0.124809	0.000815966	1	0.916297
chr20	26052901	26052901	.	-6.65821	0.000815966	0	1
chr20	26759743	26759743	.	6.65821	0.000815966	1	0
chr20	47399669	47399669	LINC01754	-0.153365	0.000815966	0.898142	1
chr20	47598203	47598203	NCOA3	0.130748	0.000815966	1	0.912492
chr21	6151108	6151108	.	6.65821	0.000815966	1	0
chr22	18634047	18634047	.	4.25214	0.000815966	0.180556	0
chr22	23263143	23263143	BCR,FBXW4P1	0.135727	0.000815966	1	0.909313
chr22	29337534	29337534	AP1B1	-0.140939	0.000815966	0.905998	1
chr3	49787117	49787117	.	3.02575	0.000815966	0.0714405	0
chr3	52528886	52528886	NT5DC2	0.150124	0.000815966	1	0.900185
chr3	91714144	91714144	.	6.65821	0.000815966	1	0
chr3	93286719	93286719	.	6.65821	0.000815966	1	0
chr3	99822000	99822000	CMSS1,HP09053	-0.0779004	0.000815966	0.94691	1
chr3	195120762	195120762	XXYLT1	0.149098	0.000815966	1	0.900832
chr4	1828168	1828168	LETM1	6.65821	0.000815966	1	0
chr4	3265062	3265062	.	0.0864141	0.000815966	1	0.94128
chr4	103667212	103667212	TACR3	0.110445	0.000815966	1	0.925565
chr4	118692383	118692383	METTL14	0.0946559	0.000815966	1	0.935861
chr4	179349390	179349390	.	-0.125243	0.000815966	0.916018	1
chr5	169395	169395	PLEKHG4B	-0.104056	0.000815966	0.929717	1
chr5	1332518	1332518	CLPTM1L	-0.120573	0.000815966	0.91902	1
chr5	2176031	2176031	.	-0.171801	0.000815966	0.886611	1
chr5	68192962	68192962	LINC02219	-0.0737535	0.000815966	0.949664	1
chr5	112817243	112817243	APC	0.0742188	0.000815966	1	0.949355
chr5	115615958	115615958	LOC101927100,TMED7,TMED7-TICAM2	0.0810235	0.000815966	1	0.944841
chr5	140337125	140337125	HBEGF	-0.105102	0.000815966	0.92296	0.993464
chr5	141971509	141971509	RNF14	0.110093	0.000815966	1	0.925794
chr6	7247690	7247690	RREB1	0.136032	0.000815966	1	0.909119
chr6	35274796	35274796	ZNF76	0.0940314	0.000815966	1	0.93627
chr6	99252898	99252898	.	0.227301	0.000815966	1	0.852774
chr6	147999571	147999571	.	0.194853	0.000815966	1	0.872399
chr7	16459203	16459203	.	0.0864658	0.000815966	1	0.941245
chr7	27177450	27177450	HOXA10,HOXA10-HOXA9	0.132549	0.000815966	1	0.911341
chr7	43468470	43468470	HECW1	-0.0730073	0.000815966	0.950161	1
chr7	58501287	58501287	.	6.65821	0.000815966	1	0
chr7	75124951	75124951	GTF2IRD2B	6.65821	0.000815966	1	0
chr7	102199214	102199214	CUX1	0.0737305	0.000815966	1	0.94968
chr8	12138751	12138751	FAM66D,USP17L2	-0.182985	0.000815966	0.879687	1
chr8	30062249	30062249	.	-0.109595	0.000815966	0.926117	1
chr8	30428086	30428086	RBPMS	0.151997	0.000815966	1	0.899004
chr8	44500557	44500557	.	6.65821	0.000815966	1	0
chr8	44870603	44870603	.	6.65821	0.000815966	1	0
chr8	44935826	44935826	.	6.65821	0.000815966	1	0
chr8	45450268	45450268	.	6.65821	0.000815966	1	0
chr8	45471690	45471690	.	6.65821	0.000815966	1	0
chr8	57265960	57265960	LOC286177	-0.311712	0.000815966	0.803742	1
chr8	106853162	106853162	.	-0.13751	0.000815966	0.908178	1
chr8	124375838	124375838	.	-0.0828257	0.000815966	0.938403	0.994444
chr8	126556562	126556562	LRATD2	3.44294	0.000815966	0.09875	0
chr9	43765551	43765551	.	0.577838	0.000815966	1	0.666667
chr9	45284212	45284212	.	6.65821	0.000815966	1	0
chr9	67370422	67370422	.	6.65821	0.000815966	1	0
chr9	67370504	67370504	.	6.65821	0.000815966	1	0
chr9	74007492	74007492	.	-0.268556	0.000815966	0.815275	0.984127
chr9	77438190	77438190	GNA14	-0.064316	0.000815966	0.955963	1
chr9	120982252	120982252	C5	-0.136965	0.000815966	0.908524	1
chr9	127365033	127365033	GARNL3	-0.160427	0.000815966	0.893708	1
chr9	136629417	136629417	.	-0.235309	0.000815966	0.847998	1
chr4	6774618	6774618	.	0.126241	0.000804466	0.994048	0.909924
chr1	3658842	3658842	TP73	0.148419	0.000803648	0.993056	0.894996
chr4	42180402	42180402	.	0.193695	0.000770982	0.992424	0.866483
chr8	10277122	10277122	MSRA	-0.142714	0.000761172	0.898162	0.992593
chr1	35681580	35681580	.	0.183739	0.00075616	0.992424	0.872553
chr1	123379978	123379978	.	6.65821	0.00075616	1	0
chr1	149840024	149840024	.	6.65821	0.00075616	1	0
chr1	248640812	248640812	.	-6.65821	0.00075616	0	1
chr11	25429683	25429683	.	6.65821	0.00075616	1	0
chr13	112283424	112283424	.	6.65821	0.00075616	1	0
chr14	16090626	16090626	.	-6.65821	0.00075616	0	1
chr14	98132910	98132910	.	0.174386	0.00075616	0.991667	0.877622
chr15	17648310	17648310	.	-6.65821	0.00075616	0	1
chr15	18285548	18285548	.	6.65821	0.00075616	1	0
chr16	34004204	34004204	.	6.65821	0.00075616	1	0
chr16	36811554	36811554	.	6.65821	0.00075616	1	0
chr17	22839073	22839073	.	6.65821	0.00075616	1	0
chr17	23898565	23898565	.	6.65821	0.00075616	1	0
chr17	46346574	46346574	ARL17A,ARL17B	6.65821	0.00075616	1	0
chr17	80602411	80602411	RPTOR	6.65821	0.00075616	1	0
chr18	17201622	17201622	.	6.65821	0.00075616	1	0
chr18	17216212	17216212	.	6.65821	0.00075616	1	0
chr18	19047384	19047384	.	6.65821	0.00075616	1	0
chr18	58209456	58209456	NEDD4L	-6.65821	0.00075616	0	1
chr19	2791813	2791813	THOP1	0.275548	0.00075616	0.988889	0.815218
chr19	34080579	34080579	.	-6.65821	0.00075616	0	1
chr2	24219288	24219288	ITSN2	0.129964	0.00075616	0.995098	0.908513
chr20	14780493	14780493	MACROD2	0.160361	0.00075616	0.99359	0.888013
chr20	27626072	27626072	.	-6.65821	0.00075616	0	1
chr20	34788214	34788214	NCOA6	0.102132	0.00075616	0.996032	0.927275
chr21	8211202	8211202	LOC100507412,RNA18SN1,RNA18SN2,RNA18SN3,RNA18SN4,RNA18SN5,RNA45SN2	6.65821	0.00075616	1	0
chr21	8397594	8397594	LOC100507412,RNA28SN3,RNA28SN5,RNA45SN3	6.65821	0.00075616	1	0
chr21	41673091	41673091	.	-0.287195	0.00075616	0.806307	0.986111
chr21	44118722	44118722	LOC102724159,PWP2	0.0925307	0.00075616	1	0.937255
chr22	21419691	21419691	HIC2	6.65821	0.00075616	1	0
chr22	43228784	43228784	SCUBE1	-0.225008	0.00075616	0.84464	0.988889
chr3	36585217	36585217	.	-0.142456	0.00075616	0.899443	0.993827
chr3	92655237	92655237	.	6.65821	0.00075616	1	0
chr4	49838044	49838044	.	-6.65821	0.00075616	0	1
chr4	50008025	50008025	.	0.985786	0.00075616	1	0.5
chr5	1600442	1600442	LOC728613	0.168554	0.00075616	0.993056	0.882453
chr5	98682007	98682007	.	0.306448	0.00075616	0.988095	0.79709
chr6	58982987	58982987	.	-6.65821	0.00075616	0	1
chr6	59105459	59105459	.	6.65821	0.00075616	1	0
chr7	1080734	1080734	C7orf50	-0.0828992	0.00075616	0.939982	0.996169
chr7	59218976	59218976	.	6.65821	0.00075616	1	0
chr7	60185959	60185959	.	0.431532	0.00075616	1	0.738889
chr7	63556849	63556849	.	6.65821	0.00075616	1	0
chr7	72005967	72005967	CALN1	0.104681	0.00075616	0.996032	0.92562
chr8	8566498	8566498	.	0.0899537	0.00075616	0.996212	0.93539
chr9	129231174	129231174	.	-0.201046	0.00075616	0.859832	0.989899
chr10	35735786	35735786	.	0.159189	0.000751343	0.994048	0.889153
chr3	47257811	47257811	KIF9	0.102392	0.000726501	0.995833	0.926921
chr9	35514700	35514700	RUSC2	-0.114823	0.000726501	0.918066	0.994949
chr2	54629498	54629498	SPTBN1	0.125366	0.000717709	0.99537	0.911695
chr7	103336641	103336641	DNAJC2	0.107965	0.000707709	0.996212	0.92366
chr20	31334031	31334031	.	-0.203848	0.000688403	0.860023	0.992063
chr1	94027946	94027946	ABCA4	0.0986893	0.000685305	0.996212	0.929682
chr15	94008668	94008668	LINC01581	-0.0848834	0.000656254	0.93891	0.996416
chr17	61485237	61485237	.	0.14288	0.000656254	0.99537	0.900573
chr22	31684884	31684884	PRR14L	0.131771	0.000641595	0.995098	0.907363
chr2	126104260	126104260	.	0.136536	0.000637169	0.995098	0.904338
chr11	72677324	72677324	.	3.54302	0.000626849	0.268452	0.0138889
chr18	12087796	12087796	.	-0.211837	0.000625529	0.855219	0.992063
chr20	32000791	32000791	XKR7	-0.253045	0.000619572	0.832335	0.993827
chr8	8027972	8027972	.	0.47499	0.000607253	1	0.716667
chr12	48907075	48907075	CCDC65	0.154783	0.000595323	0.995833	0.893507
chr4	7998453	7998453	ABLIM2	0.207176	0.000585069	0.994048	0.859737
chr1	48383797	48383797	SPATA6	6.65821	0.000560331	1	0
chr1	86216714	86216714	.	6.65821	0.000560331	1	0
chr1	122191069	122191069	.	6.65821	0.000560331	1	0
chr1	146253728	146253728	.	1.15218	0.000560331	1	0.444444
chr1	148444722	148444722	LINC01138	6.65821	0.000560331	1	0
chr10	39791548	39791548	.	6.65821	0.000560331	1	0
chr10	40110109	40110109	.	6.65821	0.000560331	1	0
chr10	103129913	103129913	NT5C2	6.65821	0.000560331	1	0
chr10	131042873	131042873	.	6.65821	0.000560331	1	0
chr11	93138262	93138262	.	6.65821	0.000560331	1	0
chr12	37049019	37049019	.	6.65821	0.000560331	1	0
chr13	29443648	29443648	MTUS2	-0.170673	0.000560331	0.882825	0.994949
chr15	18385914	18385914	.	6.65821	0.000560331	1	0
chr16	12526879	12526879	SNX29	0.241327	0.000560331	0.99537	0.84051
chr17	19059265	19059265	.	6.65821	0.000560331	1	0
chr17	24399359	24399359	.	6.65821	0.000560331	1	0
chr17	42675195	42675195	PLEKHH3	-6.65821	0.000560331	0	1
chr18	17295242	17295242	.	6.65821	0.000560331	1	0
chr18	17470155	17470155	.	6.65821	0.000560331	1	0
chr18	17628549	17628549	.	-6.65821	0.000560331	0	1
chr18	20435913	20435913	.	6.65821	0.000560331	1	0
chr18	20448281	20448281	.	6.65821	0.000560331	1	0
chr18	76163118	76163118	.	0.67085	0.000560331	0.994048	0.620679
chr2	87868189	87868189	RGPD1	6.65821	0.000560331	1	0
chr20	6213170	6213170	.	6.65821	0.000560331	1	0
chr20	38461537	38461537	.	6.65821	0.000560331	1	0
chr3	93329236	93329236	.	-0.118002	0.000560331	0.920678	1
chr6	59679653	59679653	.	-6.65821	0.000560331	0	1
chr6	170216793	170216793	.	6.65821	0.000560331	1	0
chr7	31460328	31460328	.	0.120709	0.000560331	0.996667	0.915867
chr7	57629912	57629912	.	6.65821	0.000560331	1	0
chr7	58835676	58835676	.	6.65821	0.000560331	1	0
chr7	60537268	60537268	.	6.65821	0.000560331	1	0
chr7	61594552	61594552	.	6.65821	0.000560331	1	0
chr8	45322273	45322273	.	6.65821	0.000560331	1	0
chr9	33139049	33139049	B4GALT1	-0.119269	0.000560331	0.915413	0.995169
chr9	61887347	61887347	.	6.65821	0.000560331	1	0
chr9	61991549	61991549	.	6.65821	0.000560331	1	0
chr9	67224787	67224787	CNTNAP3P2	6.65821	0.000560331	1	0
chr9	138205532	138205532	.	6.65821	0.000560331	1	0
chr3	91039417	91039417	.	0.985786	0.000547114	1	0.5
chr20	3427803	3427803	.	0.191175	0.000546104	0.994792	0.870089
chr12	108174860	108174860	WSCD2	0.172463	0.000503948	0.99537	0.882092
chr1	121969884	121969884	.	0.442274	0.000446068	1	0.733333
chr22	15255241	15255241	.	0.767441	0.000255102	1	0.583333
chr8	12104997	12104997	ZNF705D	-0.236193	0.000150058	0.847473	1
chr6	32664437	32664437	HLA-DQB1	-5.35242	0.000135401	0	0.398545
chr11	54360931	54360931	.	6.65821	0.000132459	1	0
chr14	76518484	76518484	.	-6.65821	0.000132459	0	1
chr16	38079605	38079605	.	6.65821	0.000132459	1	0
chr18	18077882	18077882	.	6.65821	0.000132459	1	0
chr18	18992388	18992388	.	-6.65821	0.000132459	0	1
chr2	93458981	93458981	.	-6.65821	0.000132459	0	1
chr20	26025432	26025432	.	6.65821	0.000132459	1	0
chr20	27674203	27674203	.	6.65821	0.000132459	1	0
chr22	16348696	16348696	.	-6.65821	0.000132459	0	1
chr3	92496374	92496374	.	6.65821	0.000132459	1	0
chr6	59762581	59762581	.	6.65821	0.000132459	1	0
chr6	73601704	73601704	SLC17A5	6.65821	0.000132459	1	0
chr7	58458117	58458117	.	6.65821	0.000132459	1	0
chr7	59016000	59016000	.	6.65821	0.000132459	1	0
chr7	59562672	59562672	.	6.65821	0.000132459	1	0
chr7	60537234	60537234	.	6.65821	0.000132459	1	0
chr7	61415112	61415112	.	0.985786	0.000132459	1	0.5
chr8	45568022	45568022	.	6.65821	0.000132459	1	0
chr9	70732331	70732331	TRPM3	6.65821	0.000132459	1	0
chr7	60746329	60746329	.	0.836615	0.000105568	1	0.555556
chr1	144800180	144800180	SRGAP2-AS1	-6.65821	7.93875e-05	0	1
chr10	29242384	29242384	.	6.65821	7.93875e-05	1	0
chr12	9437024	9437024	DDX12P	-6.65821	7.93875e-05	0	1
chr18	17355121	17355121	.	6.65821	7.93875e-05	1	0
chr22	11231087	11231087	.	6.65821	7.93875e-05	1	0
chr8	7777083	7777083	.	-6.65821	7.93875e-05	0	1
chr12	8914391	8914391	.	-6.65821	7.90913e-05	0	1
chr15	18973616	18973616	.	6.65821	7.90913e-05	1	0
chr18	18180753	18180753	.	6.65821	7.90913e-05	1	0
chr18	19095234	19095234	.	-6.65821	7.90913e-05	0	1
chr4	189669936	189669936	.	-6.65821	7.90913e-05	0	1
chr7	57021144	57021144	.	6.65821	7.90913e-05	1	0
chr7	60374507	60374507	.	6.65821	7.90913e-05	1	0
chr8	1471096	1471096	DLGAP2	6.65821	7.90913e-05	1	0
chr8	23296744	23296744	.	-6.65821	7.90913e-05	0	1
chr8	44449739	44449739	.	6.65821	7.90913e-05	1	0
chr9	40550771	40550771	LOC101929583,LOC102724580,LOC105379443	6.65821	7.90913e-05	1	0
chr15	20545742	20545742	.	-5.67243	6.89505e-05	0	0.5
chr22	18620376	18620376	.	0.681502	4.60132e-05	1	0.619751
chr8	8227974	8227974	.	-3.93411	4.60132e-05	0	0.142857
chr8	7001142	7001142	.	-0.668666	1.89511e-05	0.625379	1
chr1	1139808	1139808	LINC01342	6.65821	1.13659e-05	1	0
chr10	38853363	38853363	.	-6.65821	1.13659e-05	0	1
chr10	44662743	44662743	.	6.65821	1.13659e-05	1	0
chr17	23897202	23897202	.	6.65821	1.13659e-05	1	0
chr18	17830723	17830723	.	6.65821	1.13659e-05	1	0
chr18	19878111	19878111	.	6.65821	1.13659e-05	1	0
chr21	8409206	8409206	LOC100507412	-6.65821	1.13659e-05	0	1
chr3	155507961	155507961	PLCH1	-6.65821	1.13659e-05	0	1
chr4	51041133	51041133	.	6.65821	1.13659e-05	1	0
chr7	58989921	58989921	.	6.65821	1.13659e-05	1	0
chr9	66137354	66137354	.	6.65821	1.13659e-05	1	0
chr14	19636921	19636921	.	6.65821	8.976e-06	1	0
chr15	28548097	28548097	.	6.65821	8.976e-06	1	0
chr19	48646278	48646278	SEC1P	-6.65821	8.976e-06	0	1
chr2	110286124	110286124	.	6.65821	8.976e-06	1	0
chr1	108385269	108385269	.	0.767441	7.31683e-06	1	0.583333
chr15	17441291	17441291	.	6.65821	6.54341e-06	1	0
chr16	1102668	1102668	.	-6.65821	6.54341e-06	0	1
chr2	61979904	61979904	COMMD1	6.65821	6.54341e-06	1	0
chr20	32779799	32779799	DNMT3B	-6.65821	6.54341e-06	0	1
chr1	218721202	218721202	MIR548F3	-6.65821	5.0102e-06	0	1
chr6	59733936	59733936	.	6.65821	5.0102e-06	1	0
chr4	50314118	50314118	.	0.985786	4.0979e-06	1	0.5
chr1	121865760	121865760	.	0.519797	2.41085e-06	1	0.694444
chr4	79284728	79284728	LINC01088	0.353417	1.53624e-06	1	0.780556
chr15	28548113	28548113	.	6.65821	1.17782e-06	1	0
chr9	39936500	39936500	.	-6.65821	2.00899e-07	0	1
chr2	2795430	2795430	.	0.166995	2.16861e-08	1	0.889603
chr11	25651441	25651441	.	-6.65821	6.92864e-09	0	1
chr15	19488515	19488515	.	6.65821	5.23543e-09	1	0
chr11	53733619	53733619	.	6.65821	2.3034e-11	1	0
chr19	40605101	40605101	LTBP4	4.05535	7.37782e-12	0.156258	0
chr6	38992782	38992782	DNAH8	-0.0980685	2.93525e-14	0.933626	1
chr2	66048757	66048757	.	-0.202242	2.66091e-14	0.867891	1
chr12	28970225	28970225	.	0.214559	1.35579e-14	1	0.860428
chr11	24830918	24830918	LUZP2	-0.173704	1.05643e-14	0.885429	1
chr5	151144526	151144526	ANXA6	0.164496	8.65681e-15	1	0.891162
chr11	127678068	127678068	.	-0.11453	6.95614e-15	0.92292	1
chr6	62228872	62228872	KHDRBS2	0.202805	6.95614e-15	1	0.867549
chr1	107449436	107449436	NTNG1	-0.093138	5.54451e-15	0.936856	1
chr5	153964749	153964749	.	-0.0846333	4.98534e-15	0.942454	1
chr17	30690728	30690728	.	-0.0762311	1.11298e-15	0.948018	1
chr19	18859198	18859198	UPF1	0.0661895	1.11298e-15	1	0.954709
chr6	149449460	149449460	ZC3H12D	0.0787669	1.11298e-15	1	0.946335
chr15	96887199	96887199	.	0.137239	1.82834e-15	1	0.90835
chr2	54614765	54614765	SPTBN1	0.0890103	1.82834e-15	1	0.939569
chr7	64621030	64621030	.	0.22103	1.82834e-15	1	0.856532
chr12	73925334	73925334	.	0.127276	2.71716e-15	1	0.914714
chr20	50243317	50243317	.	-0.285896	5.72713e-15	0.818434	1
chr2	230896412	230896412	GCSIR	-0.118574	9.19941e-15	0.920309	1
chr1	226796439	226796439	.	0.172027	1.00429e-14	1	0.886471
chr12	110792641	110792641	.	-0.17411	3.28794e-14	0.885177	1
chr3	8273873	8273873	LMCD1-AS1	-0.11036	6.37281e-14	0.92562	1
chr1	182198840	182198840	.	-0.193247	9.45808e-14	0.873381	1
chr5	111805419	111805419	NREP	-0.126941	1.00593e-13	0.914929	1
chr7	74607184	74607184	.	-0.328231	2.6459e-13	0.794478	1
chr6	102171180	102171180	.	-0.281261	9.88978e-12	0.8211	1
chr1	122056780	122056780	.	6.65821	2.56213e-10	1	0
chr11	122018239	122018239	.	6.65821	3.16374e-09	1	0
chr10	47918929	47918929	NPY4R,NPY4R2	-6.65821	4.7902e-09	0	1
chr16	32825113	32825113	.	-6.65821	4.7902e-09	0	1
chr7	157887498	157887498	PTPRN2	-6.65821	6.38674e-09	0	1
chr4	6897167	6897167	.	0.23563	6.17639e-08	1	0.847807
chr1	144576000	144576000	.	6.65821	1.7783e-07	1	0
chr3	93461093	93461093	.	6.65821	1.7783e-07	1	0
chr7	102688024	102688024	RASA4DP	6.65821	3.09467e-07	1	0
chr18	20806564	20806564	.	6.65821	8.52638e-07	1	0
chr10	47910143	47910143	.	6.65821	8.89156e-07	1	0
chr16	5616686	5616686	.	6.65821	8.89156e-07	1	0
chr16	37002156	37002156	.	6.65821	8.89156e-07	1	0
chr12	36313727	36313727	.	0.439581	2.94308e-06	1	0.734722
chr2	93053064	93053064	.	-6.65821	4.26423e-06	0	1
chr9	40170652	40170652	.	-6.65821	4.26423e-06	0	1
chr18	74485302	74485302	.	1.06326	5.09346e-06	1	0.473333
chr17	25813394	25813394	.	6.65821	5.54234e-06	1	0
chr22	47176366	47176366	.	-6.65821	5.54234e-06	0	1
chr7	59563197	59563197	.	6.65821	5.54234e-06	1	0
chr9	44814474	44814474	.	6.65821	5.54234e-06	1	0
chr5	46993288	46993288	.	0.727474	8.38591e-06	1	0.6
chr4	19169041	19169041	.	6.65821	8.50353e-06	1	0
chr10	39858756	39858756	.	-0.132567	9.84665e-06	0.911329	1
chr10	47479303	47479303	ANXA8	6.65821	1.14325e-05	1	0
chr11	52154558	52154558	.	-6.65821	1.14325e-05	0	1
chr12	6928592	6928592	ATN1	-6.65821	1.14325e-05	0	1
chr14	19638844	19638844	.	6.65821	1.14325e-05	1	0
chr16	16442585	16442585	.	-6.65821	1.14325e-05	0	1
chr18	49578441	49578441	LIPG	6.65821	1.14325e-05	1	0
chr2	94012791	94012791	.	6.65821	1.14325e-05	1	0
chr20	28017811	28017811	.	6.65821	1.14325e-05	1	0
chr11	52198891	52198891	.	0.836615	1.23258e-05	1	0.555556
chr12	35585083	35585083	.	0.665026	2.01768e-05	1	0.626984
chr17	25200010	25200010	.	-0.556673	2.34782e-05	0.676667	1
chr10	41562096	41562096	.	-0.229513	4.30957e-05	0.851452	1
chr1	23552830	23552830	.	6.65821	6.77601e-05	1	0
chr1	122148952	122148952	.	6.65821	6.77601e-05	1	0
chr1	122236144	122236144	.	6.65821	6.77601e-05	1	0
chr10	39558627	39558627	.	-0.220922	6.77601e-05	0.856597	1
chr14	104830325	104830325	.	6.65821	6.77601e-05	1	0
chr15	19573823	19573823	.	-6.65821	6.77601e-05	0	1
chr15	28580368	28580368	HERC2P11	6.65821	6.77601e-05	1	0
chr17	23994001	23994001	.	-6.65821	6.77601e-05	0	1
chr18	16826652	16826652	.	6.65821	6.77601e-05	1	0
chr18	18838259	18838259	.	6.65821	6.77601e-05	1	0
chr2	92013772	92013772	.	-6.65821	6.77601e-05	0	1
chr2	95488397	95488397	.	6.65821	6.77601e-05	1	0
chr21	13587339	13587339	.	6.65821	6.77601e-05	1	0
chr21	43401617	43401617	.	-6.65821	6.77601e-05	0	1
chr3	91886029	91886029	.	6.65821	6.77601e-05	1	0
chr5	52936036	52936036	ITGA1	6.65821	6.77601e-05	1	0
chr5	115395881	115395881	.	6.65821	6.77601e-05	1	0
chr6	58580704	58580704	.	6.65821	6.77601e-05	1	0
chr7	60519674	60519674	.	6.65821	6.77601e-05	1	0
chr7	63411240	63411240	.	6.65821	6.77601e-05	1	0
chr7	111248059	111248059	IMMP2L	-6.65821	6.77601e-05	0	1
chr8	7468329	7468329	.	6.65821	6.77601e-05	1	0
chr8	7468332	7468332	.	6.65821	6.77601e-05	1	0
chr9	12444	12444	DDX11L5	6.65821	6.77601e-05	1	0
chr9	39715831	39715831	.	6.65821	6.77601e-05	1	0
chr9	44392866	44392866	.	6.65821	6.77601e-05	1	0
chr9	44957095	44957095	.	6.65821	6.77601e-05	1	0
chr9	67504168	67504168	.	6.65821	6.77601e-05	1	0
chr9	113085508	113085508	.	-6.65821	6.77601e-05	0	1
chr9	64923281	64923281	.	0.388306	8.37802e-05	1	0.761667
chr1	13080699	13080699	.	6.65821	0.000124022	1	0
chr1	104775039	104775039	.	6.65821	0.000124022	1	0
chr1	122120049	122120049	.	6.65821	0.000124022	1	0
chr1	182741470	182741470	.	6.65821	0.000124022	1	0
chr16	15137073	15137073	PDXDC1	-6.65821	0.000124022	0	1
chr16	37003318	37003318	.	6.65821	0.000124022	1	0
chr16	37916776	37916776	.	0.717653	0.000124022	1	0.604167
chr17	1260360	1260360	.	-6.65821	0.000124022	0	1
chr17	41235788	41235788	.	-6.65821	0.000124022	0	1
chr18	19101902	19101902	.	6.65821	0.000124022	1	0
chr2	93892746	93892746	.	6.65821	0.000124022	1	0
chr3	91568297	91568297	.	6.65821	0.000124022	1	0
chr4	51386885	51386885	.	6.65821	0.000124022	1	0
chr6	58959765	58959765	.	6.65821	0.000124022	1	0
chr22	18596717	18596717	.	0.222229	0.000212883	1	0.855812
chr6	168715452	168715452	.	0.577838	0.000212883	1	0.666667
chr10	38872080	38872080	.	0.909273	0.00039959	1	0.527778
chr11	116689880	116689880	.	0.183154	0.000425928	0.99537	0.875505
chr21	6431021	6431021	.	0.288978	0.000425928	1	0.816667
chr1	20815064	20815064	EIF4G3	0.410284	0.000511092	1	0.75
chr13	98989419	98989419	DOCK9	0.18551	0.000569549	0.994792	0.873552
chr1	25317129	25317129	RHD,RSRP1	6.65821	0.000611309	1	0
chr1	64250058	64250058	UBE2U	-0.143898	0.000611309	0.898828	0.994152
chr1	155191032	155191032	MUC1	6.65821	0.000611309	1	0
chr1	161460521	161460521	.	6.65821	0.000611309	1	0
chr12	1661833	1661833	.	-6.65821	0.000611309	0	1
chr15	74096754	74096754	.	-6.65821	0.000611309	0	1
chr16	34999379	34999379	.	6.65821	0.000611309	1	0
chr16	36651873	36651873	.	6.65821	0.000611309	1	0
chr18	5307366	5307366	.	-6.65821	0.000611309	0	1
chr18	16376908	16376908	.	6.65821	0.000611309	1	0
chr18	19472189	19472189	.	6.65821	0.000611309	1	0
chr19	55614013	55614013	ZNF865	6.65821	0.000611309	1	0
chr2	87789352	87789352	RGPD1,RGPD2	6.65821	0.000611309	1	0
chr2	95470950	95470950	.	6.65821	0.000611309	1	0
chr21	6036245	6036245	.	6.65821	0.000611309	1	0
chr3	93055649	93055649	.	6.65821	0.000611309	1	0
chr3	116361234	116361234	LSAMP,LSAMP-AS1	6.65821	0.000611309	1	0
chr6	5835706	5835706	.	6.65821	0.000611309	1	0
chr7	59969637	59969637	.	6.65821	0.000611309	1	0
chr7	63398085	63398085	LOC100287834	6.65821	0.000611309	1	0
chr8	1282624	1282624	DLGAP2	-0.117896	0.000611309	0.917443	0.996416
chr8	2424928	2424928	.	6.65821	0.000611309	1	0
chr9	39636206	39636206	.	6.65821	0.000611309	1	0
chr9	88244752	88244752	.	6.65821	0.000611309	1	0
chr19	5248970	5248970	PTPRS	-0.135903	0.000615917	0.904386	0.994709
chr8	80813648	80813648	ZNF704	0.132698	0.000625062	0.99537	0.907022
chr12	40252073	40252073	LRRK2	0.0915415	0.000639716	0.996528	0.934646
chr5	103820523	103820523	.	-0.212884	0.000639716	0.855047	0.992593
chr4	52810080	52810080	LINC01618	0.273922	0.000652539	0.990741	0.817681
chr6	108584624	108584624	FOXO3	0.10742	0.000667707	0.996032	0.923846
chr1	124791292	124791292	.	-0.1651	0.000675435	0.890786	1
chr14	18954623	18954623	.	1.55667	0.000675435	1	0.333333
chr1	124851513	124851513	.	-0.486631	0.000677579	0.710827	1
chr12	32123614	32123614	BICD1	-0.168815	0.000688607	0.882291	0.993056
chr9	130189698	130189698	NCS1	-0.212438	0.000693241	0.857142	0.994709
chr17	42568341	42568341	MLX	-0.162532	0.00071081	0.886186	0.993056
chr16	56148631	56148631	LOC283856	-0.133847	0.000712126	0.906109	0.995169
chr2	183165446	183165446	.	0.16421	0.000729753	0.99359	0.885621
chr16	14262061	14262061	MRTFB	-0.106744	0.00075174	0.923669	0.99537
chr8	80301103	80301103	.	0.0924142	0.00075174	0.996212	0.933779
chr2	156774547	156774547	.	-0.185311	0.000771226	0.872147	0.993056
chr4	9458617	9458617	.	0.309598	0.000771226	1	0.804935
chr15	38591996	38591996	.	0.120375	0.00078381	0.995098	0.914639
chr1	34635194	34635194	.	0.0885143	0.000791479	0.99537	0.935542
chr1	88227257	88227257	.	0.108646	0.000791479	0.995098	0.922187
chr1	113276555	113276555	.	0.14539	0.000791479	0.99359	0.897381
chr1	174518267	174518267	RABGAP1L	-0.105836	0.000791479	0.92407	0.995169
chr1	224240052	224240052	NVL	0.238449	0.000791479	0.990741	0.838284
chr10	34429678	34429678	PARD3	0.114605	0.000791479	0.994792	0.918061
chr11	48887105	48887105	.	6.65821	0.000791479	1	0
chr13	16208633	16208633	.	0.916744	0.000791479	1	0.525
chr15	19631679	19631679	.	0.985786	0.000791479	1	0.5
chr15	22538069	22538069	HERC2,HERC2P2	0.985786	0.000791479	1	0.5
chr15	32587170	32587170	LOC101928042	6.65821	0.000791479	1	0
chr15	84867361	84867361	ALPK3	-0.107251	0.000791479	0.922727	0.994709
chr16	16277764	16277764	NOMO2,NOMO3	6.65821	0.000791479	1	0
chr16	32786821	32786821	.	6.65821	0.000791479	1	0
chr16	34503409	34503409	.	6.65821	0.000791479	1	0
chr16	36402192	36402192	.	-6.65821	0.000791479	0	1
chr16	36584724	36584724	.	6.65821	0.000791479	1	0
chr17	24093413	24093413	.	-6.65821	0.000791479	0	1
chr17	25663072	25663072	.	6.65821	0.000791479	1	0
chr17	26016741	26016741	.	6.65821	0.000791479	1	0
chr19	23134705	23134705	ZNF730	0.985786	0.000791479	1	0.5
chr2	89531008	89531008	.	-6.65821	0.000791479	0	1
chr2	109846481	109846481	RGPD5,RGPD6,RGPD8	0.985786	0.000791479	1	0.5
chr2	208285341	208285341	PIKFYVE	0.123683	0.000791479	0.994444	0.911921
chr2	234058887	234058887	SPP2	-0.163178	0.000791479	0.884899	0.992063
chr20	46557283	46557283	.	-0.152855	0.000791479	0.891801	0.992593
chr21	5019562	5019562	.	6.65821	0.000791479	1	0
chr21	5123567	5123567	GATD3A,GATD3B	6.65821	0.000791479	1	0
chr21	6434062	6434062	.	0.11395	0.000791479	1	0.923295
chr21	39073243	39073243	.	-0.102604	0.000791479	0.925736	0.994709
chr22	21286256	21286256	POM121L8P	-6.65821	0.000791479	0	1
chr22	21287689	21287689	POM121L8P	-6.65821	0.000791479	0	1
chr22	21315524	21315524	FAM230H	6.65821	0.000791479	1	0
chr22	37227381	37227381	RAC2	6.65821	0.000791479	1	0
chr3	17115411	17115411	.	-0.0715537	0.000791479	0.947483	0.996169
chr3	130264146	130264146	COL6A4P2	-6.65821	0.000791479	0	1
chr3	186864754	186864754	.	-6.65821	0.000791479	0	1
chr4	123219994	123219994	SPATA5	0.114433	0.000791479	0.994444	0.917851
chr5	23719899	23719899	.	0.118497	0.000791479	0.994444	0.91524
chr6	59362186	59362186	.	-6.65821	0.000791479	0	1
chr6	89587951	89587951	ANKRD6	-0.162478	0.000791479	0.884787	0.991453
chr6	168214028	168214028	.	-0.153705	0.000791479	0.890245	0.991453
chr7	59264008	59264008	.	6.65821	0.000791479	1	0
chr8	7799500	7799500	.	6.65821	0.000791479	1	0
chr8	12089938	12089938	ZNF705D	0.985786	0.000791479	1	0.5
chr8	45073831	45073831	.	-6.65821	0.000791479	0	1
chr8	85716538	85716538	.	6.65821	0.000791479	1	0
chr9	67571814	67571814	.	6.65821	0.000791479	1	0
chr1	2669369	2669369	TTC34	6.65821	0.00079649	1	0
chr1	7227124	7227124	CAMTA1	-0.12056	0.00079649	0.913351	0.993827
chr1	7357842	7357842	CAMTA1	-0.215566	0.00079649	0.859821	1
chr1	13063326	13063326	.	6.65821	0.00079649	1	0
chr1	15065255	15065255	KAZN	0.102868	0.00079649	0.995098	0.925927
chr1	31784121	31784121	.	0.0876572	0.00079649	0.99537	0.936103
chr1	43523328	43523328	.	0.126005	0.00079649	1	0.915529
chr1	89657601	89657601	LRRC8C	-0.114747	0.00079649	0.92278	1
chr1	114789290	114789290	.	0.151461	0.00079649	0.991667	0.891839
chr1	122171887	122171887	.	6.65821	0.00079649	1	0
chr1	122568330	122568330	.	-6.65821	0.00079649	0	1
chr1	144813757	144813757	SRGAP2-AS1	6.65821	0.00079649	1	0
chr1	148021098	148021098	.	0.0946718	0.00079649	1	0.93585
chr1	148629240	148629240	NOTCH2NLB	6.65821	0.00079649	1	0
chr1	179414526	179414526	AXDND1	-0.164179	0.00079649	0.89136	1
chr1	185020678	185020678	.	0.106233	0.00079649	0.994048	0.922771
chr1	214633934	214633934	CENPF	0.0774776	0.00079649	1	0.94719
chr10	12048071	12048071	.	0.0976687	0.00079649	1	0.933887
chr10	30926931	30926931	ZNF438	0.0698114	0.00079649	1	0.95229
chr10	41431642	41431642	.	6.65821	0.00079649	1	0
chr10	62285815	62285815	.	0.134253	0.00079649	0.994048	0.904829
chr10	72247873	72247873	.	-0.125138	0.00079649	0.916086	1
chr11	120175	120175	.	-6.65821	0.00079649	0	1
chr11	12627754	12627754	.	-0.141107	0.00079649	0.905891	1
chr11	68938168	68938168	IGHMBP2	0.0996901	0.00079649	1	0.932566
chr11	69571515	69571515	.	0.101141	0.00079649	1	0.931618
chr11	87956774	87956774	.	-0.146462	0.00079649	0.894776	0.991453
chr11	89844500	89844500	TRIM53AP	6.65821	0.00079649	1	0
chr11	125145874	125145874	.	0.0905421	0.00079649	0.994048	0.932971
chr11	127470107	127470107	.	0.0900455	0.00079649	1	0.938888
chr12	6108021	6108021	VWF	0.0891685	0.00079649	1	0.939465
chr12	44198872	44198872	TMEM117	3.39417	0.00079649	0.0951346	0
chr12	108611854	108611854	.	0.0890193	0.00079649	1	0.939563
chr12	116554000	116554000	.	0.090855	0.00079649	1	0.938356
chr13	44434311	44434311	TSC22D1	0.0877332	0.00079649	1	0.94041
chr13	106434453	106434453	.	-0.171795	0.00079649	0.877648	0.989899
chr13	110456969	110456969	COL4A2,COL4A2-AS2	0.381447	0.00079649	1	0.765344
chr13	114044288	114044288	RASA3	6.65821	0.00079649	1	0
chr14	50548104	50548104	ATL1	0.102256	0.00079649	0.994792	0.926039
chr14	60992375	60992375	SLC38A6	-0.122473	0.00079649	0.917797	1
chr15	18165775	18165775	.	6.65821	0.00079649	1	0
chr15	19107418	19107418	.	6.65821	0.00079649	1	0
chr15	19493284	19493284	.	6.65821	0.00079649	1	0
chr15	19493293	19493293	.	6.65821	0.00079649	1	0
chr16	17712980	17712980	.	-0.0817853	0.00079649	0.944337	1
chr16	20494506	20494506	.	6.65821	0.00079649	1	0
chr16	33143992	33143992	.	-6.65821	0.00079649	0	1
chr16	33562587	33562587	.	6.65821	0.00079649	1	0
chr16	34967622	34967622	.	6.65821	0.00079649	1	0
chr16	37425911	37425911	.	6.65821	0.00079649	1	0
chr16	37777844	37777844	.	6.65821	0.00079649	1	0
chr16	47183191	47183191	ITFG1	-0.0937272	0.00079649	0.93647	1
chr16	52473172	52473172	TOX3	-0.102093	0.00079649	0.925246	0.993827
chr16	69966879	69966879	.	0.217111	0.00079649	1	0.85889
chr16	89080398	89080398	.	0.122759	0.00079649	1	0.917614
chr17	10338001	10338001	MYH13	-0.10959	0.00079649	0.92612	1
chr17	25714463	25714463	.	6.65821	0.00079649	1	0
chr17	25934596	25934596	.	-6.65821	0.00079649	0	1
chr17	29078519	29078519	MYO18A	0.0842267	0.00079649	1	0.942723
chr18	12975281	12975281	SEH1L	0.113323	0.00079649	1	0.923701
chr18	16613977	16613977	.	6.65821	0.00079649	1	0
chr18	17191070	17191070	.	-6.65821	0.00079649	0	1
chr18	18397437	18397437	.	6.65821	0.00079649	1	0
chr18	19070437	19070437	.	6.65821	0.00079649	1	0
chr19	602339	602339	HCN2	6.65821	0.00079649	1	0
chr19	14042643	14042643	IL27RA	-0.152709	0.00079649	0.890867	0.991453
chr19	30445706	30445706	ZNF536	-0.144844	0.00079649	0.903522	1
chr2	2937453	2937453	LINC01250	-0.112119	0.00079649	0.92448	1
chr2	4887261	4887261	.	-0.223295	0.00079649	0.855173	1
chr2	15654747	15654747	.	0.216252	0.00079649	0.991667	0.852233
chr2	61253277	61253277	USP34	-0.0572452	0.00079649	0.956259	0.99537
chr2	74516168	74516168	TLX2	3.02099	0.00079649	0.0711725	0
chr2	95791664	95791664	.	6.65821	0.00079649	1	0
chr2	106017078	106017078	.	0.150328	0.00079649	0.992754	0.893527
chr2	148941428	148941428	KIF5C	-0.0876296	0.00079649	0.940478	1
chr2	158175352	158175352	CCDC148,CCDC148-AS1	0.1814	0.00079649	0.990741	0.8725
chr2	201369478	201369478	.	-0.0843466	0.00079649	0.937128	0.994152
chr20	27214078	27214078	.	0.767441	0.00079649	1	0.583333
chr20	28271504	28271504	.	6.65821	0.00079649	1	0
chr20	37403184	37403184	SRC	0.148601	0.00079649	1	0.901146
chr21	13745195	13745195	LOC110091777	6.65821	0.00079649	1	0
chr21	14568477	14568477	SAMSN1	-0.0783111	0.00079649	0.946637	1
chr21	20650977	20650977	.	-0.221946	0.00079649	0.855982	1
chr21	38304503	38304503	KCNJ15	-0.20218	0.00079649	0.85827	0.988889
chr22	10584683	10584683	.	6.65821	0.00079649	1	0
chr22	12060786	12060786	.	-6.65821	0.00079649	0	1
chr22	15289096	15289096	.	1.39142	0.00079649	1	0.375
chr22	21522316	21522316	.	-6.65821	0.00079649	0	1
chr22	37227040	37227040	RAC2	6.65821	0.00079649	1	0
chr22	47595652	47595652	.	0.0921546	0.00079649	1	0.937502
chr3	11538	11538	.	6.65821	0.00079649	1	0
chr3	27580714	27580714	.	0.117827	0.00079649	1	0.92079
chr3	43730859	43730859	ABHD5	0.0752799	0.00079649	1	0.94865
chr3	46296096	46296096	.	-0.0895499	0.00079649	0.939214	1
chr3	73568612	73568612	LOC101927296,PDZRN3	0.095418	0.00079649	0.994792	0.930486
chr3	92936617	92936617	.	-6.65821	0.00079649	0	1
chr3	98743278	98743278	ST3GAL6	0.0863317	0.00079649	1	0.941334
chr3	117078161	117078161	.	-0.204415	0.00079649	0.86657	1
chr3	156673062	156673062	.	0.101663	0.00079649	1	0.931277
chr3	158087161	158087161	.	-0.123813	0.00079649	0.916937	1
chr3	177573386	177573386	LINC00578	-0.169932	0.00079649	0.887773	1
chr3	186026502	186026502	.	0.193268	0.00079649	1	0.873369
chr4	2169112	2169112	POLN	0.114247	0.00079649	1	0.923103
chr4	51291997	51291997	.	-6.65821	0.00079649	0	1
chr4	79707969	79707969	.	-6.65821	0.00079649	0	1
chr5	43269266	43269266	NIM1K	0.297312	0.00079649	1	0.811905
chr5	47029715	47029715	.	6.65821	0.00079649	1	0
chr5	47114455	47114455	.	6.65821	0.00079649	1	0
chr5	71025990	71025990	.	6.65821	0.00079649	1	0
chr5	138832750	138832750	CTNNA1	0.0966044	0.00079649	0.994792	0.929713
chr6	12190242	12190242	.	-0.101832	0.00079649	0.931167	1
chr6	21759402	21759402	CASC15	0.103154	0.00079649	1	0.930305
chr6	28396354	28396354	ZSCAN12	-0.0738498	0.00079649	0.944573	0.994709
chr6	58749457	58749457	.	6.65821	0.00079649	1	0
chr6	59448271	59448271	.	6.65821	0.00079649	1	0
chr6	59642420	59642420	.	6.65821	0.00079649	1	0
chr6	59682047	59682047	.	6.65821	0.00079649	1	0
chr6	88788287	88788287	RNGTT	0.117099	0.00079649	1	0.92126
chr6	128469665	128469665	PTPRK	-0.107341	0.00079649	0.92758	1
chr7	4808621	4808621	RADIL	0.148668	0.00079649	1	0.901104
chr7	5287288	5287288	SLC29A4	-0.130308	0.00079649	0.912773	1
chr7	44226420	44226420	CAMK2B	-0.201922	0.00079649	0.868086	1
chr7	57850049	57850049	.	6.65821	0.00079649	1	0
chr7	58385224	58385224	.	6.65821	0.00079649	1	0
chr7	63611792	63611792	.	6.65821	0.00079649	1	0
chr7	136143061	136143061	.	0.143492	0.00079649	1	0.904378
chr7	158331561	158331561	PTPRN2	-0.211239	0.00079649	0.862433	1
chr8	1398609	1398609	DLGAP2	6.65821	0.00079649	1	0
chr8	27627570	27627570	.	-0.0757013	0.00079649	0.94837	1
chr8	39065997	39065997	ADAM9	0.107705	0.00079649	1	0.927344
chr8	44115446	44115446	.	6.65821	0.00079649	1	0
chr8	46242782	46242782	.	0.148365	0.00079649	1	0.901295
chr8	105461751	105461751	ZFPM2	-0.121849	0.00079649	0.918199	1
chr9	6328574	6328574	TPD52L3	-0.13721	0.00079649	0.908369	1
chr9	42643107	42643107	.	6.65821	0.00079649	1	0
chr9	61097076	61097076	.	6.65821	0.00079649	1	0
chr9	67420515	67420515	.	6.65821	0.00079649	1	0
chr9	133495208	133495208	.	0.0947244	0.00079649	0.994444	0.930613
chr16	11745742	11745742	.	0.0838821	0.000799221	1	0.942951
chr17	54942791	54942791	TOM1L1	0.100832	0.000799221	1	0.93182
chr15	36619195	36619195	CDIN1	-0.113447	0.000801872	0.92362	1
chr21	31450776	31450776	TIAM1	0.114347	0.000801872	1	0.923038
chr5	37380678	37380678	WDR70	0.120542	0.000801872	1	0.919041
chr12	61472484	61472484	.	-0.368123	0.000805921	0.772538	1
chr1	12088526	12088526	TNFRSF8	-2.7423	0.000809705	0	0.0569136
chr10	74933637	74933637	KAT6B,LOC101929165	0.117871	0.000809705	1	0.920762
chr14	72969211	72969211	.	0.100958	0.000809705	1	0.931738
chr6	11365727	11365727	NEDD9	0.0940242	0.000809705	1	0.936275
chr16	21281179	21281179	CRYM	-0.202085	0.000810521	0.867986	1
chr16	87445190	87445190	ZCCHC14	0.102259	0.000810521	1	0.930889
chr17	70769202	70769202	.	0.0795087	0.000810521	1	0.945844
chr2	174242187	174242187	OLA1	0.0813161	0.000810521	1	0.944647
chr3	129625908	129625908	.	0.114684	0.000810521	1	0.92282
chr2	23694731	23694731	KLHL29	0.126858	0.00081851	1	0.914982
chr21	6427724	6427724	.	0.410284	0.000822704	1	0.75
chr16	15617208	15617208	MARF1	0.0809371	0.000825564	1	0.944898
chr17	34432621	34432621	.	0.128473	0.000829121	1	0.913947
chr5	17245948	17245948	BASP1	0.118002	0.000829121	1	0.920678
chr1	32661818	32661818	RBBP4	0.384979	0.000837205	1	0.763448
chr14	64810508	64810508	SPTB	0.0880328	0.000837861	1	0.940213
chr4	154968335	154968335	.	0.265553	0.000837861	1	0.830199
chr18	23030	23030	.	0.477443	0.000854683	1	0.715432
chr4	156831737	156831737	PDGFC	-0.0998838	0.000854683	0.924464	0.991453
chr5	72980432	72980432	FCHO2	0.0876417	0.000854683	1	0.94047
chr7	145559616	145559616	.	0.197111	0.000854683	0.994444	0.866172
chr2	71245759	71245759	.	0.117493	0.000859907	1	0.921006
chr8	64235095	64235095	LINC01414	0.203613	0.000868698	1	0.867057
chr2	28345402	28345402	.	0.0927626	0.000899276	0.993056	0.930591
chr5	561000	561000	.	0.191704	0.000911887	1	0.874327
chr22	32731274	32731274	SYN3	-0.0906348	0.000942394	0.931979	0.993056
chr6	36250852	36250852	PNPLA1	0.0947808	0.000944665	1	0.935779
chr10	68903755	68903755	DDX50	0.30376	0.000989396	0.987179	0.797853
chr15	94271977	94271977	MCTP2	0.13483	0.00102129	1	0.909885
chr3	126058769	126058769	SLC41A3	-0.0931033	0.00104245	0.927821	0.990338
chr21	43992835	43992835	.	0.213149	0.00109196	0.986111	0.849298
chr8	22817877	22817877	PEBP4	0.13346	0.00109196	0.990196	0.901821
chr14	53043885	53043885	DDHD1	-0.104419	0.00111458	0.920869	0.990741
chr15	66040386	66040386	MEGF11	-0.103762	0.00123466	0.920509	0.989899
chr9	65925638	65925638	.	-0.669527	0.00124212	0.625	1
chr11	89968557	89968557	TRIM64	0.508464	0.00135472	1	0.7
chr15	98026343	98026343	.	0.122733	0.00141971	0.988636	0.907194
chr9	42713730	42713730	.	0.224974	0.00142542	1	0.854167
chr4	1465982	1465982	.	-0.206634	0.00145098	0.845966	0.977778
chr17	15519117	15519117	TVP23C,TVP23C-CDRT4	0.118412	0.00145184	0.98913	0.9104
chr3	123525921	123525921	HACD2	-0.107486	0.00147076	0.917173	0.988889
chr8	123546349	123546349	.	-0.122719	0.00148316	0.906301	0.987654
chr6	32600991	32600991	.	-4.90154	0.00151164	0	0.288889
chr2	222932657	222932657	ACSL3	-0.193844	0.00155749	0.873016	1
chr6	129529201	129529201	.	-0.12029	0.00167842	0.905573	0.985185
chr11	70065270	70065270	ANO1,LINC02753	-0.141776	0.00171429	0.889973	0.982906
chr17	24860463	24860463	.	-5.67243	0.0017452	0	0.5
chr7	22821366	22821366	TOMM7	1.02812	0.00177968	0.954545	0.462963
chr6	168841480	168841480	.	-0.109676	0.00178445	0.914622	0.987654
chr8	74661954	74661954	MIR2052HG	-0.172811	0.00178445	0.87042	0.982456
chr6	35750102	35750102	.	-0.089377	0.00190251	0.928335	0.988304
chr21	42794351	42794351	.	-0.103338	0.00201271	0.918017	0.986928
chr12	6018809	6018809	VWF	-0.124287	0.00202175	0.902069	0.984127
chr9	17909494	17909494	.	0.613817	0.00204213	1	0.65
chr9	42714312	42714312	.	0.196794	0.00209504	1	0.871212
chr6	82168821	82168821	.	0.22683	0.00225271	1	0.853056
chr6	85421304	85421304	.	0.0931171	0.00225271	0.988095	0.925709
chr6	161302395	161302395	.	-0.20391	0.00226739	0.844615	0.974359
chr12	113710243	113710243	.	-0.174276	0.00230757	0.870304	0.983333
chr1	2086602	2086602	PRKCZ	0.133469	0.00238977	0.981481	0.893871
chr1	36157084	36157084	MAP7D1	-6.65821	0.00242114	0	1
chr1	48383300	48383300	SPATA6	-6.65821	0.00242114	0	1
chr1	108442836	108442836	.	-6.65821	0.00242114	0	1
chr1	120916326	120916326	LINC00623	6.65821	0.00242114	1	0
chr1	122071126	122071126	.	0.985786	0.00242114	1	0.5
chr1	122077689	122077689	.	6.65821	0.00242114	1	0
chr1	122160933	122160933	.	6.65821	0.00242114	1	0
chr1	122236139	122236139	.	6.65821	0.00242114	1	0
chr1	144701778	144701778	SRGAP2-AS1	0.985786	0.00242114	1	0.5
chr1	148682260	148682260	.	6.65821	0.00242114	1	0
chr1	148888089	148888089	PDE4DIP	6.65821	0.00242114	1	0
chr1	155190987	155190987	MUC1	6.65821	0.00242114	1	0
chr1	236387340	236387340	.	6.65821	0.00242114	1	0
chr10	37112239	37112239	.	6.65821	0.00242114	1	0
chr10	40008474	40008474	.	6.65821	0.00242114	1	0
chr12	36780186	36780186	.	6.65821	0.00242114	1	0
chr13	114014073	114014073	RASA3	-6.65821	0.00242114	0	1
chr14	16057167	16057167	.	6.65821	0.00242114	1	0
chr14	16057184	16057184	.	6.65821	0.00242114	1	0
chr14	34542547	34542547	.	6.65821	0.00242114	1	0
chr14	34560567	34560567	.	6.65821	0.00242114	1	0
chr14	105112444	105112444	.	6.65821	0.00242114	1	0
chr15	19287680	19287680	.	6.65821	0.00242114	1	0
chr15	22362944	22362944	.	-6.65821	0.00242114	0	1
chr15	22489640	22489640	.	-6.65821	0.00242114	0	1
chr15	22538055	22538055	HERC2,HERC2P2	0.985786	0.00242114	1	0.5
chr15	30381796	30381796	CHRFAM7A	6.65821	0.00242114	1	0
chr15	82446174	82446174	.	-6.65821	0.00242114	0	1
chr15	84188936	84188936	.	6.65821	0.00242114	1	0
chr16	28707303	28707303	EIF3C	6.65821	0.00242114	1	0
chr16	36750499	36750499	.	6.65821	0.00242114	1	0
chr16	36882612	36882612	.	6.65821	0.00242114	1	0
chr16	36891614	36891614	.	6.65821	0.00242114	1	0
chr17	20507584	20507584	.	6.65821	0.00242114	1	0
chr17	24146062	24146062	.	6.65821	0.00242114	1	0
chr17	24707906	24707906	.	6.65821	0.00242114	1	0
chr17	25661880	25661880	.	6.65821	0.00242114	1	0
chr17	30770772	30770772	SUZ12P1	-0.11965	0.00242114	0.901021	0.979798
chr18	14641316	14641316	.	6.65821	0.00242114	1	0
chr18	17419557	17419557	.	6.65821	0.00242114	1	0
chr18	18448515	18448515	.	-6.65821	0.00242114	0	1
chr18	18644898	18644898	.	0.985786	0.00242114	1	0.5
chr18	19422171	19422171	.	6.65821	0.00242114	1	0
chr18	20078458	20078458	.	0.985786	0.00242114	1	0.5
chr18	20640411	20640411	.	6.65821	0.00242114	1	0
chr19	56150316	56150316	ZNF444	-0.0932535	0.00242114	0.923761	0.986111
chr2	8476834	8476834	.	6.65821	0.00242114	1	0
chr2	91403924	91403924	.	6.65821	0.00242114	1	0
chr2	93343550	93343550	.	6.65821	0.00242114	1	0
chr2	95429932	95429932	.	6.65821	0.00242114	1	0
chr2	110033915	110033915	.	6.65821	0.00242114	1	0
chr2	110467183	110467183	LIMS3,LIMS3-LOC440895,LIMS4	6.65821	0.00242114	1	0
chr2	111102554	111102554	ACOXL,ACOXL-AS1	0.0717423	0.00242114	0.988889	0.940431
chr2	195567715	195567715	.	6.65821	0.00242114	1	0
chr2	242007390	242007390	LINC01237	-6.65821	0.00242114	0	1
chr20	26582337	26582337	.	6.65821	0.00242114	1	0
chr20	27458974	27458974	.	6.65821	0.00242114	1	0
chr21	6078565	6078565	.	6.65821	0.00242114	1	0
chr21	6431130	6431130	.	6.65821	0.00242114	1	0
chr21	43535649	43535649	HSF2BP	6.65821	0.00242114	1	0
chr3	91777105	91777105	.	6.65821	0.00242114	1	0
chr3	91787291	91787291	.	-6.65821	0.00242114	0	1
chr3	92699213	92699213	.	6.65821	0.00242114	1	0
chr3	92863266	92863266	.	6.65821	0.00242114	1	0
chr3	93008888	93008888	.	6.65821	0.00242114	1	0
chr3	93247410	93247410	.	6.65821	0.00242114	1	0
chr4	50372084	50372084	.	6.65821	0.00242114	1	0
chr4	51162719	51162719	.	6.65821	0.00242114	1	0
chr4	51461386	51461386	.	6.65821	0.00242114	1	0
chr5	3499236	3499236	LINC01017,LINC01019	6.65821	0.00242114	1	0
chr5	17587654	17587654	.	6.65821	0.00242114	1	0
chr5	70363325	70363325	GUSBP3	6.65821	0.00242114	1	0
chr6	33525493	33525493	.	0.836615	0.00242114	1	0.555556
chr6	48901140	48901140	.	-6.65821	0.00242114	0	1
chr6	59017505	59017505	.	6.65821	0.00242114	1	0
chr6	59231060	59231060	.	6.65821	0.00242114	1	0
chr6	59306583	59306583	.	6.65821	0.00242114	1	0
chr6	66553291	66553291	.	-0.164721	0.00242114	0.872437	0.979167
chr6	125389293	125389293	.	6.65821	0.00242114	1	0
chr6	170214004	170214004	.	6.65821	0.00242114	1	0
chr6	170214032	170214032	.	6.65821	0.00242114	1	0
chr7	58424553	58424553	.	6.65821	0.00242114	1	0
chr7	59816310	59816310	.	0.985786	0.00242114	1	0.5
chr7	63393944	63393944	.	6.65821	0.00242114	1	0
chr7	63398062	63398062	LOC100287834	6.65821	0.00242114	1	0
chr7	63398077	63398077	LOC100287834	6.65821	0.00242114	1	0
chr7	63424548	63424548	.	0.836615	0.00242114	1	0.555556
chr7	72958363	72958363	.	6.65821	0.00242114	1	0
chr7	73047081	73047081	.	-6.65821	0.00242114	0	1
chr7	73159941	73159941	GTF2IP1,GTF2IP4	6.65821	0.00242114	1	0
chr8	2296926	2296926	.	6.65821	0.00242114	1	0
chr8	2464659	2464659	.	6.65821	0.00242114	1	0
chr8	45237787	45237787	.	6.65821	0.00242114	1	0
chr8	45237796	45237796	.	6.65821	0.00242114	1	0
chr8	45647524	45647524	.	6.65821	0.00242114	1	0
chr8	45682805	45682805	.	0.985786	0.00242114	1	0.5
chr8	45849605	45849605	.	0.985786	0.00242114	1	0.5
chr9	41878777	41878777	.	-6.65821	0.00242114	0	1
chr9	62021071	62021071	.	6.65821	0.00242114	1	0
chr9	62115909	62115909	.	6.65821	0.00242114	1	0
chr9	62948750	62948750	.	6.65821	0.00242114	1	0
chr9	67007112	67007112	LOC105379450	6.65821	0.00242114	1	0
chr9	67700881	67700881	.	6.65821	0.00242114	1	0
chr5	139788716	139788716	.	0.0926002	0.00256845	0.984848	0.923
chr1	219517966	219517966	LYPLAL1-AS1	-0.10132	0.00257459	0.915567	0.982906
chr5	177346238	177346238	LMAN2	-0.094924	0.0026372	0.920823	0.984127
chr9	134051591	134051591	BRD3	-0.128128	0.00266585	0.895683	0.979798
chr3	102310708	102310708	.	0.135075	0.00267778	0.981481	0.892865
chr10	39687767	39687767	.	0.985786	0.00285361	1	0.5
chr15	30105471	30105471	ULK4P1,ULK4P2,ULK4P3	-0.985786	0.00285361	0.5	1
chr22	15289089	15289089	.	0.985786	0.00285361	1	0.5
chr5	70337753	70337753	GUSBP3	0.985786	0.00285361	1	0.5
chr4	150256346	150256346	DCLK2	0.2173	0.00287289	1	0.858775
chr13	64295187	64295187	.	0.135189	0.00291945	0.979167	0.890686
chr4	90554949	90554949	CCSER1	-0.117039	0.00316023	0.904224	0.981481
chr14	73023784	73023784	ZFYVE1	0.0583636	0.00355953	0.987179	0.947644
chr11	385250	385250	.	0.577838	0.00370419	1	0.666667
chr2	110585043	110585043	RGPD6	0.577838	0.00370419	1	0.666667
chr20	26753096	26753096	.	0.577838	0.00370419	1	0.666667
chr20	63418445	63418445	KCNQ2	0.171188	0.00370419	0.974359	0.86422
chr5	10639526	10639526	ANKRD33B	0.577838	0.00370419	1	0.666667
chr9	135247692	135247692	.	-0.090586	0.00443244	0.915344	0.975309
chr11	52976471	52976471	.	0.371514	0.00452133	0.981818	0.756647
chr20	63094240	63094240	.	-0.525906	0.0046304	0.691468	1
chr20	32723197	32723197	COMMD7	0.767441	0.00476557	1	0.583333
chr9	39853360	39853360	FGF7P3	0.767441	0.00476557	1	0.583333
chr9	62626872	62626872	.	0.767441	0.00476557	1	0.583333
chr21	5256719	5256719	.	-0.287363	0.00495751	0.817593	1
chr6	32507311	32507311	.	-0.186085	0.00503733	0.877778	1
chr21	13730218	13730218	LOC110091777	0.169627	0.00527186	1	0.887963
chr4	75275956	75275956	.	0.445158	0.00539238	0.99	0.724504
chr1	13658469	13658469	.	0.566042	0.00543441	1	0.672222
chr9	44898769	44898769	.	0.337662	0.00728081	1	0.789236
chr22	21303683	21303683	FAM230H	-0.878442	0.00737797	0.539394	1
chr1	2678135	2678135	TTC34	6.65821	0.00800129	1	0
chr1	122512378	122512378	.	6.65821	0.00800129	1	0
chr10	41354306	41354306	.	-6.65821	0.00800129	0	1
chr11	53008775	53008775	.	-6.65821	0.00800129	0	1
chr15	17314903	17314903	.	6.65821	0.00800129	1	0
chr15	19190938	19190938	.	6.65821	0.00800129	1	0
chr15	51294659	51294659	CYP19A1	-6.65821	0.00800129	0	1
chr15	74094877	74094877	.	-6.65821	0.00800129	0	1
chr16	1232531	1232531	.	-6.65821	0.00800129	0	1
chr16	34349247	34349247	.	-6.65821	0.00800129	0	1
chr16	34468776	34468776	.	-6.65821	0.00800129	0	1
chr16	37479250	37479250	.	-6.65821	0.00800129	0	1
chr16	38182623	38182623	.	6.65821	0.00800129	1	0
chr17	24292080	24292080	.	-6.65821	0.00800129	0	1
chr2	93272382	93272382	.	-6.65821	0.00800129	0	1
chr2	110011330	110011330	.	6.65821	0.00800129	1	0
chr21	5120332	5120332	GATD3A,GATD3B	-6.65821	0.00800129	0	1
chr21	6134071	6134071	.	0.669527	0.00800129	1	0.625
chr21	6141065	6141065	.	6.65821	0.00800129	1	0
chr22	15644310	15644310	.	6.65821	0.00800129	1	0
chr6	26733193	26733193	.	-6.65821	0.00800129	0	1
chr6	59740899	59740899	.	-6.65821	0.00800129	0	1
chr7	58266691	58266691	.	0.669527	0.00800129	1	0.625
chr8	7799507	7799507	.	6.65821	0.00800129	1	0
chr8	44115012	44115012	.	-6.65821	0.00800129	0	1
chr8	44430122	44430122	.	-6.65821	0.00800129	0	1
chr8	44448338	44448338	.	-6.65821	0.00800129	0	1
chr9	39958854	39958854	.	-6.65821	0.00800129	0	1
chr9	64676831	64676831	LOC100996643,LOC101928195,LOC101929583,LOC105379443	6.65821	0.00800129	1	0
chr9	67857979	67857979	.	-5.00273	0.00844474	0	0.310606
chr1	2674768	2674768	TTC34	6.65821	0.00890425	1	0
chr1	71519171	71519171	NEGR1	6.65821	0.00890425	1	0
chr1	78845892	78845892	.	6.65821	0.00890425	1	0
chr1	108458954	108458954	NBPF6	6.65821	0.00890425	1	0
chr1	121726763	121726763	.	6.65821	0.00890425	1	0
chr1	121944717	121944717	.	6.65821	0.00890425	1	0
chr1	122190443	122190443	.	-6.65821	0.00890425	0	1
chr1	123347727	123347727	.	-6.65821	0.00890425	0	1
chr1	123375303	123375303	.	-6.65821	0.00890425	0	1
chr1	124027031	124027031	.	6.65821	0.00890425	1	0
chr1	144652548	144652548	LOC105371215,SRGAP2-AS1	-6.65821	0.00890425	0	1
chr1	144813774	144813774	SRGAP2-AS1	6.65821	0.00890425	1	0
chr1	144813787	144813787	SRGAP2-AS1	6.65821	0.00890425	1	0
chr1	146107929	146107929	NBPF10	6.65821	0.00890425	1	0
chr1	146532727	146532727	HYDIN2	6.65821	0.00890425	1	0
chr1	152196142	152196142	.	6.65821	0.00890425	1	0
chr1	184848854	184848854	NIBAN1	6.65821	0.00890425	1	0
chr10	39790784	39790784	.	6.65821	0.00890425	1	0
chr10	40562477	40562477	.	6.65821	0.00890425	1	0
chr11	36553657	36553657	RAG1	-6.65821	0.00890425	0	1
chr11	53448686	53448686	.	6.65821	0.00890425	1	0
chr12	26785100	26785100	ITPR2	6.65821	0.00890425	1	0
chr12	77977939	77977939	NAV3	-6.65821	0.00890425	0	1
chr13	86259148	86259148	.	-6.65821	0.00890425	0	1
chr14	57333831	57333831	.	6.65821	0.00890425	1	0
chr15	18785287	18785287	.	-6.65821	0.00890425	0	1
chr15	18827009	18827009	.	6.65821	0.00890425	1	0
chr15	19129220	19129220	.	-6.65821	0.00890425	0	1
chr15	19492096	19492096	.	6.65821	0.00890425	1	0
chr15	21986365	21986365	.	-6.65821	0.00890425	0	1
chr15	32368196	32368196	LOC100288637	6.65821	0.00890425	1	0
chr16	8857534	8857534	CARHSP1,LOC100130283	-6.65821	0.00890425	0	1
chr16	14949241	14949241	NPIPA1,PKD1P3-NPIPA1	6.65821	0.00890425	1	0
chr16	18389902	18389902	PKD1P5-LOC105376752	6.65821	0.00890425	1	0
chr16	32363234	32363234	.	-6.65821	0.00890425	0	1
chr16	32650718	32650718	LOC105369266	6.65821	0.00890425	1	0
chr16	32693257	32693257	.	6.65821	0.00890425	1	0
chr16	34988269	34988269	.	-6.65821	0.00890425	0	1
chr16	36472217	36472217	.	6.65821	0.00890425	1	0
chr16	36541938	36541938	.	6.65821	0.00890425	1	0
chr16	37269449	37269449	.	6.65821	0.00890425	1	0
chr16	37363640	37363640	.	-6.65821	0.00890425	0	1
chr16	37473498	37473498	.	-6.65821	0.00890425	0	1
chr16	38094203	38094203	.	6.65821	0.00890425	1	0
chr16	38150645	38150645	.	6.65821	0.00890425	1	0
chr17	22848564	22848564	.	-6.65821	0.00890425	0	1
chr17	23493039	23493039	.	-6.65821	0.00890425	0	1
chr17	24001400	24001400	.	6.65821	0.00890425	1	0
chr17	24666262	24666262	.	6.65821	0.00890425	1	0
chr17	25431283	25431283	.	-6.65821	0.00890425	0	1
chr17	40942696	40942696	.	6.65821	0.00890425	1	0
chr18	16843699	16843699	.	6.65821	0.00890425	1	0
chr18	17137523	17137523	.	-6.65821	0.00890425	0	1
chr18	20010632	20010632	.	-6.65821	0.00890425	0	1
chr18	20445599	20445599	.	6.65821	0.00890425	1	0
chr18	20792657	20792657	.	6.65821	0.00890425	1	0
chr19	602345	602345	HCN2	6.65821	0.00890425	1	0
chr2	4733960	4733960	.	6.65821	0.00890425	1	0
chr2	86959957	86959957	RGPD1,RGPD2	-6.65821	0.00890425	0	1
chr2	91405400	91405400	.	-6.65821	0.00890425	0	1
chr2	92029633	92029633	.	6.65821	0.00890425	1	0
chr2	95462314	95462314	.	-6.65821	0.00890425	0	1
chr2	109917259	109917259	LIMS3,LIMS3-LOC440895,LIMS4	6.65821	0.00890425	1	0
chr2	110008123	110008123	.	-6.65821	0.00890425	0	1
chr2	110559626	110559626	RGPD5,RGPD6,RGPD8	-6.65821	0.00890425	0	1
chr20	26745049	26745049	.	6.65821	0.00890425	1	0
chr21	5123552	5123552	GATD3A,GATD3B	6.65821	0.00890425	1	0
chr21	7587571	7587571	.	6.65821	0.00890425	1	0
chr21	8209450	8209450	LOC100507412,RNA45SN2	-6.65821	0.00890425	0	1
chr21	43484229	43484229	.	-6.65821	0.00890425	0	1
chr21	44246094	44246094	.	6.65821	0.00890425	1	0
chr22	11277229	11277229	.	-6.65821	0.00890425	0	1
chr22	15985675	15985675	.	6.65821	0.00890425	1	0
chr22	16358636	16358636	.	6.65821	0.00890425	1	0
chr22	50806576	50806576	.	-6.65821	0.00890425	0	1
chr3	11764	11764	LINC01986	6.65821	0.00890425	1	0
chr3	76803355	76803355	ROBO2	6.65821	0.00890425	1	0
chr3	91685564	91685564	.	6.65821	0.00890425	1	0
chr3	91730031	91730031	.	6.65821	0.00890425	1	0
chr3	92328367	92328367	.	6.65821	0.00890425	1	0
chr3	93445842	93445842	.	6.65821	0.00890425	1	0
chr3	93559828	93559828	.	6.65821	0.00890425	1	0
chr3	116556545	116556545	LINC00903	6.65821	0.00890425	1	0
chr4	49959571	49959571	.	-6.65821	0.00890425	0	1
chr4	50690905	50690905	.	6.65821	0.00890425	1	0
chr4	79969361	79969361	ANTXR2	6.65821	0.00890425	1	0
chr4	186116042	186116042	FAM149A	6.65821	0.00890425	1	0
chr5	46825384	46825384	.	-6.65821	0.00890425	0	1
chr5	46963765	46963765	.	-6.65821	0.00890425	0	1
chr5	109265261	109265261	LOC285638	-6.65821	0.00890425	0	1
chr5	116558587	116558587	SEMA6A	6.65821	0.00890425	1	0
chr5	176028862	176028862	.	6.65821	0.00890425	1	0
chr5	181418311	181418311	.	6.65821	0.00890425	1	0
chr6	26829438	26829438	.	6.65821	0.00890425	1	0
chr6	59421885	59421885	.	6.65821	0.00890425	1	0
chr6	59441688	59441688	.	6.65821	0.00890425	1	0
chr6	59568298	59568298	.	6.65821	0.00890425	1	0
chr7	59498407	59498407	.	-6.65821	0.00890425	0	1
chr7	60406307	60406307	.	6.65821	0.00890425	1	0
chr7	63584571	63584571	.	6.65821	0.00890425	1	0
chr7	74801909	74801909	GTF2IRD2	-6.65821	0.00890425	0	1
chr7	102489329	102489329	RASA4B	-6.65821	0.00890425	0	1
chr7	155350391	155350391	.	-6.65821	0.00890425	0	1
chr8	2423262	2423262	.	6.65821	0.00890425	1	0
chr8	44145363	44145363	.	6.65821	0.00890425	1	0
chr8	44365522	44365522	.	-6.65821	0.00890425	0	1
chr8	44495253	44495253	.	6.65821	0.00890425	1	0
chr8	45054232	45054232	.	6.65821	0.00890425	1	0
chr8	45165742	45165742	.	6.65821	0.00890425	1	0
chr9	39329067	39329067	.	6.65821	0.00890425	1	0
chr9	40388916	40388916	.	6.65821	0.00890425	1	0
chr9	42694216	42694216	.	-0.404831	0.00890425	0.752878	1
chr9	61098591	61098591	.	6.65821	0.00890425	1	0
chr9	62483389	62483389	LINC01189	-6.65821	0.00890425	0	1
chr15	21075836	21075836	.	1.81133	0.00923418	1	0.277778
chr7	74415529	74415529	.	0.455038	0.0104595	1	0.726786
chr21	42588057	42588057	.	0.613817	0.0105241	1	0.65
chr6	32497892	32497892	.	-0.381939	0.010886	0.765079	1
chr9	40174972	40174972	.	-0.4133	0.0128886	0.748413	1
chr1	48383345	48383345	SPATA6	0.985786	0.0135298	1	0.5
chr10	75333935	75333935	ZNF503,ZNF503-AS1	0.985786	0.0135298	1	0.5
chr11	54055789	54055789	.	0.985786	0.0135298	1	0.5
chr18	8705208	8705208	GACAT2	-5.67243	0.0135298	0	0.5
chr18	18644889	18644889	.	0.985786	0.0135298	1	0.5
chr2	130514909	130514909	.	0.985786	0.0135298	1	0.5
chr2	130539961	130539961	PRSS40A,PRSS40B	0.985786	0.0135298	1	0.5
chr3	92264576	92264576	.	0.985786	0.0135298	1	0.5
chr3	92974028	92974028	.	0.985786	0.0135298	1	0.5
chr3	129339662	129339662	.	0.985786	0.0135298	1	0.5
chr5	69901626	69901626	GUSBP14,GUSBP16,LOC101929599	0.985786	0.0135298	1	0.5
chr20	31207108	31207108	.	0.985786	0.0138217	1	0.5
chr9	45373460	45373460	.	-0.985786	0.0138217	0.5	1
chr21	13765208	13765208	LOC110091777	-0.238643	0.0146772	0.846017	1
chr12	34938046	34938046	.	-0.41689	0.0152544	0.746528	1
chr9	42591658	42591658	.	0.577838	0.0152557	1	0.666667
chr7	42997341	42997341	.	0.492535	0.015466	0.985839	0.697817
chr16	37185682	37185682	.	-2.51525	0.0163778	0.166667	1
chr19	55704995	55704995	EPN1	0.166684	0.0175849	0.992281	0.88292
chr1	477342	477342	.	6.65821	0.0203912	1	0
chr1	1139747	1139747	LINC01342	6.65821	0.0203912	1	0
chr1	13080013	13080013	.	6.65821	0.0203912	1	0
chr1	13084695	13084695	.	6.65821	0.0203912	1	0
chr1	13152809	13152809	PRAMEF25,PRAMEF26	-6.65821	0.0203912	0	1
chr1	13185665	13185665	.	6.65821	0.0203912	1	0
chr1	13328820	13328820	.	-6.65821	0.0203912	0	1
chr1	23689113	23689113	.	6.65821	0.0203912	1	0
chr1	25327179	25327179	RHD,RSRP1	6.65821	0.0203912	1	0
chr1	91159344	91159344	.	6.65821	0.0203912	1	0
chr1	108231605	108231605	NBPF4	6.65821	0.0203912	1	0
chr1	121912522	121912522	.	6.65821	0.0203912	1	0
chr1	122086183	122086183	.	0.985786	0.0203912	1	0.5
chr1	122594181	122594181	.	6.65821	0.0203912	1	0
chr1	123009620	123009620	.	6.65821	0.0203912	1	0
chr1	123259384	123259384	.	6.65821	0.0203912	1	0
chr1	144334479	144334479	.	6.65821	0.0203912	1	0
chr1	144774104	144774104	SRGAP2-AS1	6.65821	0.0203912	1	0
chr1	144813754	144813754	SRGAP2-AS1	6.65821	0.0203912	1	0
chr1	161592233	161592233	FCGR2C	6.65821	0.0203912	1	0
chr1	227507825	227507825	.	6.65821	0.0203912	1	0
chr1	228618322	228618322	.	6.65821	0.0203912	1	0
chr10	784174	784174	.	-6.65821	0.0203912	0	1
chr10	6370463	6370463	.	-0.985786	0.0203912	0.5	1
chr10	59697001	59697001	SLC16A9	-6.65821	0.0203912	0	1
chr10	131042889	131042889	.	6.65821	0.0203912	1	0
chr11	402972	402972	PKP3	6.65821	0.0203912	1	0
chr11	48897838	48897838	.	6.65821	0.0203912	1	0
chr11	52096239	52096239	.	6.65821	0.0203912	1	0
chr11	52229227	52229227	.	-3.94549	0.0203912	0.0555556	1
chr11	52850335	52850335	.	6.65821	0.0203912	1	0
chr11	65239489	65239489	SLC22A20P	6.65821	0.0203912	1	0
chr12	32896942	32896942	.	-6.65821	0.0203912	0	1
chr12	86856184	86856184	.	0.577838	0.0203912	1	0.666667
chr12	110173022	110173022	IFT81	-6.65821	0.0203912	0	1
chr13	113543196	113543196	TMCO3	6.65821	0.0203912	1	0
chr13	114014051	114014051	RASA3	-6.65821	0.0203912	0	1
chr14	34560535	34560535	.	6.65821	0.0203912	1	0
chr14	45844660	45844660	.	6.65821	0.0203912	1	0
chr14	105112454	105112454	.	6.65821	0.0203912	1	0
chr15	17391297	17391297	.	6.65821	0.0203912	1	0
chr15	17982439	17982439	.	6.65821	0.0203912	1	0
chr15	19488506	19488506	.	2.51525	0.0203912	1	0.166667
chr15	19622001	19622001	.	0.577838	0.0203912	1	0.666667
chr15	19636282	19636282	.	6.65821	0.0203912	1	0
chr15	21275252	21275252	.	6.65821	0.0203912	1	0
chr15	21889994	21889994	.	6.65821	0.0203912	1	0
chr15	22085417	22085417	LOC101927079	6.65821	0.0203912	1	0
chr15	30270405	30270405	.	-6.65821	0.0203912	0	1
chr15	30282651	30282651	.	6.65821	0.0203912	1	0
chr15	74095189	74095189	.	-6.65821	0.0203912	0	1
chr15	82519410	82519410	.	6.65821	0.0203912	1	0
chr15	84383316	84383316	.	-6.65821	0.0203912	0	1
chr15	85270640	85270640	.	6.65821	0.0203912	1	0
chr16	15241280	15241280	.	6.65821	0.0203912	1	0
chr16	16299080	16299080	.	6.65821	0.0203912	1	0
chr16	18368812	18368812	PKD1P5-LOC105376752	6.65821	0.0203912	1	0
chr16	26884574	26884574	.	0.155345	0.0203912	0.990842	0.888674
chr16	28429167	28429167	.	6.65821	0.0203912	1	0
chr16	28666230	28666230	.	6.65821	0.0203912	1	0
chr16	33516147	33516147	.	6.65821	0.0203912	1	0
chr16	33606002	33606002	.	6.65821	0.0203912	1	0
chr16	33788831	33788831	.	5.67243	0.0203912	0.5	0
chr16	34426330	34426330	.	6.65821	0.0203912	1	0
chr16	34487368	34487368	.	-6.65821	0.0203912	0	1
chr16	37183253	37183253	.	6.65821	0.0203912	1	0
chr16	37194948	37194948	.	6.65821	0.0203912	1	0
chr16	37194957	37194957	.	6.65821	0.0203912	1	0
chr16	37250277	37250277	.	-6.65821	0.0203912	0	1
chr16	37280357	37280357	.	6.65821	0.0203912	1	0
chr16	37406773	37406773	.	6.65821	0.0203912	1	0
chr16	38236753	38236753	.	-6.65821	0.0203912	0	1
chr16	58422668	58422668	.	0.150891	0.0203912	0.992165	0.892644
chr16	82276234	82276234	.	-6.65821	0.0203912	0	1
chr16	88000673	88000673	BANP	-6.65821	0.0203912	0	1
chr17	18426942	18426942	KRT17P2	-6.65821	0.0203912	0	1
chr17	19034698	19034698	GRAP	6.65821	0.0203912	1	0
chr17	19105830	19105830	.	-6.65821	0.0203912	0	1
chr17	19119380	19119380	.	6.65821	0.0203912	1	0
chr17	19119392	19119392	.	6.65821	0.0203912	1	0
chr17	22396619	22396619	.	6.65821	0.0203912	1	0
chr17	23580293	23580293	.	6.65821	0.0203912	1	0
chr17	23621364	23621364	.	6.65821	0.0203912	1	0
chr17	24189165	24189165	.	6.65821	0.0203912	1	0
chr17	24197828	24197828	.	6.65821	0.0203912	1	0
chr17	24245884	24245884	.	-6.65821	0.0203912	0	1
chr17	25036280	25036280	.	-6.65821	0.0203912	0	1
chr17	25081906	25081906	.	6.65821	0.0203912	1	0
chr17	26150027	26150027	.	-5.67243	0.0203912	0	0.5
chr17	26216286	26216286	.	6.65821	0.0203912	1	0
chr17	26417563	26417563	.	6.65821	0.0203912	1	0
chr17	38014657	38014657	TBC1D3C,TBC1D3D,TBC1D3H,TBC1D3I,TBC1D3L	-0.410284	0.0203912	0.75	1
chr17	38016681	38016681	TBC1D3C	-6.65821	0.0203912	0	1
chr17	38128241	38128241	TBC1D3,TBC1D3C,TBC1D3D,TBC1D3E,TBC1D3F,TBC1D3G,TBC1D3H,TBC1D3I,TBC1D3K,TBC1D3L	-6.65821	0.0203912	0	1
chr17	64904681	64904681	LRRC37A3	-6.65821	0.0203912	0	1
chr18	16659907	16659907	.	6.65821	0.0203912	1	0
chr18	16682721	16682721	.	0.985786	0.0203912	1	0.5
chr18	17297392	17297392	.	-6.65821	0.0203912	0	1
chr18	17994077	17994077	.	6.65821	0.0203912	1	0
chr18	18351786	18351786	.	6.65821	0.0203912	1	0
chr18	18877488	18877488	.	-6.65821	0.0203912	0	1
chr18	19430831	19430831	.	6.65821	0.0203912	1	0
chr18	19430840	19430840	.	6.65821	0.0203912	1	0
chr18	19873652	19873652	.	6.65821	0.0203912	1	0
chr18	19959588	19959588	.	6.65821	0.0203912	1	0
chr18	20174630	20174630	.	6.65821	0.0203912	1	0
chr18	20428100	20428100	.	6.65821	0.0203912	1	0
chr18	20428109	20428109	.	6.65821	0.0203912	1	0
chr19	1049714	1049714	ABCA7	6.65821	0.0203912	1	0
chr19	3175084	3175084	.	6.65821	0.0203912	1	0
chr19	16063403	16063403	.	6.65821	0.0203912	1	0
chr19	29901646	29901646	.	6.65821	0.0203912	1	0
chr19	47948833	47948833	.	6.65821	0.0203912	1	0
chr19	50499086	50499086	.	6.65821	0.0203912	1	0
chr19	50719674	50719674	SHANK1	-6.65821	0.0203912	0	1
chr19	55613905	55613905	ZNF865	6.65821	0.0203912	1	0
chr2	87804850	87804850	RGPD1,RGPD2	6.65821	0.0203912	1	0
chr2	92434709	92434709	.	0.833666	0.0203912	0.958333	0.533333
chr2	93343541	93343541	.	6.65821	0.0203912	1	0
chr2	93932714	93932714	.	6.65821	0.0203912	1	0
chr2	108695005	108695005	.	0.105791	0.0203912	1	0.928588
chr2	109925510	109925510	LIMS3,LIMS3-LOC440895,LIMS4	6.65821	0.0203912	1	0
chr2	131258099	131258099	POTEE	6.65821	0.0203912	1	0
chr2	134009909	134009909	.	6.65821	0.0203912	1	0
chr2	195567707	195567707	.	6.65821	0.0203912	1	0
chr20	25843328	25843328	.	-6.65821	0.0203912	0	1
chr20	26772658	26772658	.	6.65821	0.0203912	1	0
chr20	26887767	26887767	.	-6.65821	0.0203912	0	1
chr20	27072837	27072837	.	6.65821	0.0203912	1	0
chr20	27104062	27104062	.	-6.65821	0.0203912	0	1
chr20	28044001	28044001	.	0.985786	0.0203912	1	0.5
chr20	28153401	28153401	.	6.65821	0.0203912	1	0
chr20	28271517	28271517	.	6.65821	0.0203912	1	0
chr20	28324949	28324949	.	6.65821	0.0203912	1	0
chr20	28346177	28346177	.	-6.65821	0.0203912	0	1
chr20	28346186	28346186	.	-6.65821	0.0203912	0	1
chr20	54005634	54005634	BCAS1	0.173832	0.0203912	0.990657	0.877067
chr21	5014601	5014601	.	6.65821	0.0203912	1	0
chr21	7816381	7816381	.	6.65821	0.0203912	1	0
chr21	8211155	8211155	LOC100507412,RNA18SN1,RNA18SN2,RNA18SN3,RNA18SN4,RNA18SN5,RNA45SN2	6.65821	0.0203912	1	0
chr21	8409657	8409657	LOC100507412	6.65821	0.0203912	1	0
chr21	8439633	8439633	RNA45SN1,RNA45SN5	-6.65821	0.0203912	0	1
chr21	8439638	8439638	RNA45SN1,RNA45SN5	-6.65821	0.0203912	0	1
chr21	8439640	8439640	RNA45SN1,RNA45SN5	-6.65821	0.0203912	0	1
chr21	8593111	8593111	.	-6.65821	0.0203912	0	1
chr21	20468033	20468033	.	0.199564	0.0203912	0.990476	0.861228
chr21	22451831	22451831	.	-6.65821	0.0203912	0	1
chr21	44134357	44134357	GATD3A,GATD3B	6.65821	0.0203912	1	0
chr21	44239060	44239060	ICOSLG,LOC102723996	6.65821	0.0203912	1	0
chr22	21554151	21554151	UBE2L3	6.65821	0.0203912	1	0
chr22	31903340	31903340	DEPDC5	6.65821	0.0203912	1	0
chr22	40536662	40536662	MRTFA	0.985786	0.0203912	1	0.5
chr3	4979107	4979107	BHLHE40-AS1	5.67243	0.0203912	0.5	0
chr3	10595653	10595653	ATP2B2	-6.65821	0.0203912	0	1
chr3	16980116	16980116	PLCL2	6.65821	0.0203912	1	0
chr3	18826771	18826771	.	-6.65821	0.0203912	0	1
chr3	78584101	78584101	.	6.65821	0.0203912	1	0
chr3	91701209	91701209	.	6.65821	0.0203912	1	0
chr3	91701218	91701218	.	6.65821	0.0203912	1	0
chr3	91753970	91753970	.	6.65821	0.0203912	1	0
chr3	91977887	91977887	.	6.65821	0.0203912	1	0
chr3	91992685	91992685	.	6.65821	0.0203912	1	0
chr3	92090423	92090423	.	6.65821	0.0203912	1	0
chr3	92148073	92148073	.	6.65821	0.0203912	1	0
chr3	92266080	92266080	.	6.65821	0.0203912	1	0
chr3	92395501	92395501	.	6.65821	0.0203912	1	0
chr3	92484329	92484329	.	-6.65821	0.0203912	0	1
chr3	93069176	93069176	.	6.65821	0.0203912	1	0
chr3	93155878	93155878	.	6.65821	0.0203912	1	0
chr3	93410625	93410625	.	-6.65821	0.0203912	0	1
chr3	93512324	93512324	.	-6.65821	0.0203912	0	1
chr3	128955027	128955027	CFAP92	6.65821	0.0203912	1	0
chr3	132470916	132470916	DNAJC13	6.65821	0.0203912	1	0
chr3	183608444	183608444	.	-6.65821	0.0203912	0	1
chr4	109818	109818	.	-0.181042	0.0203912	0.872511	0.990505
chr4	9338950	9338950	.	6.65821	0.0203912	1	0
chr4	49132036	49132036	.	-6.65821	0.0203912	0	1
chr4	50870717	50870717	.	-6.65821	0.0203912	0	1
chr4	51607467	51607467	.	6.65821	0.0203912	1	0
chr4	190070138	190070138	.	-6.65821	0.0203912	0	1
chr4	190070144	190070144	.	-6.65821	0.0203912	0	1
chr4	190070460	190070460	.	6.65821	0.0203912	1	0
chr5	17520463	17520463	.	6.65821	0.0203912	1	0
chr5	47209682	47209682	.	6.65821	0.0203912	1	0
chr5	69969974	69969974	GUSBP14,GUSBP16	6.65821	0.0203912	1	0
chr5	70327132	70327132	GUSBP3	6.65821	0.0203912	1	0
chr5	70852436	70852436	GUSBP16	-6.65821	0.0203912	0	1
chr5	181449547	181449547	.	-6.65821	0.0203912	0	1
chr6	26684018	26684018	.	6.65821	0.0203912	1	0
chr6	26718347	26718347	.	-6.65821	0.0203912	0	1
chr6	38964151	38964151	DNAH8	6.65821	0.0203912	1	0
chr6	38964172	38964172	DNAH8	6.65821	0.0203912	1	0
chr6	38964191	38964191	DNAH8	6.65821	0.0203912	1	0
chr6	58696042	58696042	.	6.65821	0.0203912	1	0
chr6	58713874	58713874	.	0.381834	0.0203912	1	0.765136
chr6	59197419	59197419	.	6.65821	0.0203912	1	0
chr6	59242018	59242018	.	6.65821	0.0203912	1	0
chr6	59642249	59642249	.	6.65821	0.0203912	1	0
chr6	133664968	133664968	TARID	6.65821	0.0203912	1	0
chr6	133665000	133665000	TARID	6.65821	0.0203912	1	0
chr6	167422944	167422944	.	6.65821	0.0203912	1	0
chr6	168669071	168669071	.	-6.65821	0.0203912	0	1
chr7	221391	221391	FAM20C	0.898667	0.0203912	1	0.531746
chr7	24002501	24002501	.	1.24317	0.0203912	1	0.416667
chr7	51208404	51208404	COBL	6.65821	0.0203912	1	0
chr7	55838581	55838581	SEPTIN14	6.65821	0.0203912	1	0
chr7	56983398	56983398	.	6.65821	0.0203912	1	0
chr7	58467318	58467318	.	6.65821	0.0203912	1	0
chr7	58639821	58639821	.	6.65821	0.0203912	1	0
chr7	58921361	58921361	.	6.65821	0.0203912	1	0
chr7	58977076	58977076	.	6.65821	0.0203912	1	0
chr7	59872046	59872046	.	6.65821	0.0203912	1	0
chr7	60039629	60039629	.	6.65821	0.0203912	1	0
chr7	60239309	60239309	.	6.65821	0.0203912	1	0
chr7	61181457	61181457	.	6.65821	0.0203912	1	0
[truncated: 207 more rows]

## Sheet: MDD_only_vs_Control
Chromosome	Start	End	symbol	mean_log2_Experiment_over_Control	adjusted_p_value	methylation_rate_for_Depression_only	methylation_rate_for_control
chr1	1698439	1698439	.	6.65821	0.00242131	1	0
chr1	2666387	2666387	TTC34	6.65821	0.000823484	1	0
chr1	2789553	2789553	TTC34	3.51623	0.000830944	0.104417	0
chr1	7879710	7879710	.	0.11846	0.027823	0.990972	0.912066
chr1	10431593	10431593	CENPS,CENPS-CORT	-0.177648	0.0411705	0.870295	0.985648
chr1	13163061	13163061	.	6.65821	0.0200539	1	0
chr1	13173412	13173412	PRAMEF27	-0.508464	0.0495715	0.7	1
chr1	16586636	16586636	NBPF1	0.0623607	0.000795948	0.997126	0.954521
chr1	16656900	16656900	.	0.577838	0.00435367	1	0.666667
chr1	16694027	16694027	ESPNP	-5.67243	0.0200539	0	0.5
chr1	21306397	21306397	ECE1	0.101599	0.000823484	1	0.93132
chr1	21394774	21394774	.	-0.143147	0.000974705	0.895451	0.989899
chr1	21808799	21808799	.	0.110687	0.000823484	1	0.925408
chr1	22347693	22347693	.	0.114119	0.0480663	0.988038	0.912134
chr1	25323069	25323069	RHD,RSRP1	0.312014	0.00145358	1	0.803571
chr1	28207246	28207246	DNAJC8	0.084712	0.000836227	1	0.942403
chr1	28530697	28530697	RCC1	0.278474	0.000846689	1	0.822707
chr1	32181735	32181735	TXLNA	-0.139517	0.0404542	0.895659	0.987616
chr1	32876231	32876231	.	-6.65821	0.000610425	0	1
chr1	40921655	40921655	.	0.249857	0.0200539	0.988492	0.829712
chr1	41912750	41912750	HIVEP3	-0.167556	0.000831849	0.889253	1
chr1	44218647	44218647	DMAP1	0.163602	0.000698555	0.994048	0.886407
chr1	46901400	46901400	.	-0.254412	0.000823484	0.836712	1
chr1	47456123	47456123	.	0.087011	0.0473308	0.990712	0.932142
chr1	48383681	48383681	SPATA6	6.65821	0.00845939	1	0
chr1	48383797	48383797	SPATA6	6.65821	0.00242131	1	0
chr1	51711501	51711501	OSBPL9	6.65821	0.0200539	1	0
chr1	56150133	56150133	.	-0.181589	0.0200539	0.872467	0.990834
chr1	63474084	63474084	ITGB3BP	6.65821	0.0200539	1	0
chr1	67366217	67366217	IL12RB2	0.081174	0.00179868	0.990196	0.935473
chr1	72632826	72632826	.	-0.0998641	0.000823484	0.932452	1
chr1	74705644	74705644	CRYZ	0.0855461	0.000823484	1	0.941852
chr1	102853991	102853991	.	0.13737	0.000830956	1	0.908267
chr1	108236333	108236333	NBPF4	0.985786	0.00242131	1	0.5
chr1	108432781	108432781	.	6.65821	0.000823484	1	0
chr1	112773550	112773550	.	-6.65821	0.00845939	0	1
chr1	112780476	112780476	.	0.0919915	0.000823484	1	0.937609
chr1	112898649	112898649	.	6.65821	0.00242131	1	0
chr1	121647834	121647834	.	6.65821	0.000610425	1	0
chr1	121693303	121693303	.	6.65821	1.23942e-05	1	0
chr1	121726772	121726772	.	-6.65821	0.00845939	0	1
chr1	121860506	121860506	.	-6.65821	0.0200539	0	1
chr1	121906077	121906077	.	6.65821	0.000610425	1	0
chr1	121931766	121931766	.	0.985786	0.000795948	1	0.5
chr1	121933149	121933149	.	6.65821	0.0200539	1	0
chr1	121970086	121970086	.	6.65821	0.00242131	1	0
chr1	122048142	122048142	.	6.65821	0.00242131	1	0
chr1	122083037	122083037	.	6.65821	0.00845939	1	0
chr1	122125486	122125486	.	0.410284	0.0200539	1	0.75
chr1	122181137	122181137	.	-6.65821	0.00845939	0	1
chr1	122191069	122191069	.	6.65821	0.00242131	1	0
chr1	122200736	122200736	.	6.65821	0.0200539	1	0
chr1	122331221	122331221	.	6.65821	0.0200539	1	0
chr1	122723850	122723850	.	0.205235	0.00845939	1	0.866071
chr1	123204487	123204487	.	6.65821	0.0200539	1	0
chr1	123727474	123727474	.	0.94593	0.00437234	1	0.514286
chr1	124554949	124554949	.	0.650717	0.00422781	1	0.633333
chr1	124795929	124795929	.	6.65821	0.000823484	1	0
chr1	124935837	124935837	.	-0.338096	0.0129444	0.788996	1
chr1	144077423	144077423	.	-6.65821	0.000610425	0	1
chr1	144606156	144606156	.	6.65821	0.0200539	1	0
chr1	144636925	144636925	.	6.65821	0.0200539	1	0
chr1	144738523	144738523	LSP1P5,SRGAP2-AS1	6.65821	0.00845939	1	0
chr1	144762377	144762377	SRGAP2-AS1	6.65821	0.0200539	1	0
chr1	144787566	144787566	SRGAP2-AS1	-0.985786	0.0131519	0.5	1
chr1	144813534	144813534	SRGAP2-AS1	6.65821	0.00242131	1	0
chr1	144813542	144813542	SRGAP2-AS1	6.65821	7.65813e-05	1	0
chr1	144852082	144852082	SRGAP2-AS1	6.65821	0.000610425	1	0
chr1	145161889	145161889	.	-6.65821	7.65813e-05	0	1
chr1	148061810	148061810	PDE4DIPP1	6.65821	0.000823484	1	0
chr1	148721369	148721369	.	-6.65821	0.00774144	0	1
chr1	149326370	149326370	.	6.65821	0.00845939	1	0
chr1	149333683	149333683	.	6.65821	0.0200539	1	0
chr1	149530265	149530265	NBPF19	-6.65821	0.00845939	0	1
chr1	149824471	149824471	.	6.65821	0.00845939	1	0
chr1	150885004	150885004	.	0.102763	0.000830944	1	0.930561
chr1	155593893	155593893	.	0.127291	0.0412215	0.988095	0.903805
chr1	158448835	158448835	.	-0.148826	0.000936947	0.890454	0.988304
chr1	168115932	168115932	GPR161	0.100837	0.000823484	1	0.931817
chr1	180324040	180324040	ACBD6	-6.65821	0.0200539	0	1
chr1	180324069	180324069	ACBD6	-6.65821	0.0200539	0	1
chr1	181850184	181850184	.	-0.20577	0.0379144	0.851295	0.983333
chr1	192886994	192886994	.	0.0700948	0.00078557	0.996914	0.949161
chr1	202136530	202136530	ARL8A	0.111201	0.000695941	0.996377	0.921721
chr1	206224647	206224647	SRGAP2	0.577838	0.0196492	1	0.666667
chr1	206480280	206480280	IKBKE	6.65821	7.65813e-05	1	0
chr1	212613680	212613680	ATF3	-0.21015	0.00155806	0.851792	0.986928
chr1	212725134	212725134	.	6.65821	0.0200539	1	0
chr1	225645156	225645156	ENAH	-0.142242	0.0388361	0.892816	0.986365
chr1	226198819	226198819	.	0.082461	0.0426336	0.991898	0.936238
chr1	228625778	228625778	.	6.65821	0.00845939	1	0
chr1	228641594	228641594	.	-0.872487	0.00242003	0.541667	1
chr1	229378379	229378379	.	-0.132525	0.0348276	0.90164	0.989349
chr1	235560784	235560784	GNG4	0.10971	0.025488	0.992857	0.919422
chr1	247688021	247688021	.	6.65821	0.00845939	1	0
chr10	322519	322519	DIP2C	-6.65821	0.00774144	0	1
chr10	346854	346854	DIP2C	6.65821	0.00242131	1	0
chr10	1235482	1235482	ADARB2	6.65821	0.00845939	1	0
chr10	7590999	7590999	ITIH5	0.117902	0.000823484	1	0.920742
chr10	15024237	15024237	ACBD7-DCLRE1CP1,DCLRE1CP1	-0.100588	0.000823484	0.931979	1
chr10	17119397	17119397	CUBN	-0.0911743	0.00161677	0.928212	0.989418
chr10	23045692	23045692	.	-0.139556	0.0433114	0.895529	0.9875
chr10	23193047	23193047	PTF1A	4.08974	0.00086218	0.160268	0
chr10	26175935	26175935	MYO3A	-0.240508	0.000824201	0.844911	1
chr10	29242384	29242384	.	6.65821	2.55832e-11	1	0
chr10	38843485	38843485	.	6.65821	0.0200539	1	0
chr10	38853363	38853363	.	-0.767441	0.000823484	0.583333	1
chr10	38888580	38888580	.	0.241297	0.000846689	1	0.844444
chr10	39560623	39560623	.	0.245523	0.000831849	1	0.841945
chr10	39695114	39695114	.	-6.65821	0.00242131	0	1
chr10	39821049	39821049	.	6.65821	0.00845939	1	0
chr10	39927328	39927328	.	6.65821	0.00845939	1	0
chr10	39962268	39962268	.	0.508464	0.00596083	1	0.7
chr10	40346446	40346446	.	-0.362827	0.000823484	0.762123	0.982906
chr10	40386156	40386156	.	-6.65821	0.000126305	0	1
chr10	40758556	40758556	.	-6.65821	0.00845939	0	1
chr10	40797129	40797129	.	-6.65821	1.85208e-07	0	1
chr10	40860230	40860230	.	6.65821	0.0200539	1	0
chr10	41070352	41070352	.	6.65821	0.00242131	1	0
chr10	41506258	41506258	.	6.65821	0.00845939	1	0
chr10	46349628	46349628	AGAP14P	6.65821	0.0200539	1	0
chr10	63089561	63089561	.	-0.133151	0.000823484	0.910956	1
chr10	69993616	69993616	.	6.65821	0.0200539	1	0
chr10	75047184	75047184	DUSP29	-0.163176	0.000698555	0.886474	0.993827
chr10	78974837	78974837	ZMIZ1-AS1	3.02024	0.000823484	0.0711302	0
chr10	79135064	79135064	ZMIZ1	-0.123933	0.0420337	0.905763	0.987908
chr10	81988382	81988382	NRG3	-0.142488	0.0454837	0.89122	0.984774
chr10	98344054	98344054	.	0.0858585	0.000823484	1	0.941646
chr10	103129913	103129913	NT5C2	6.65821	0.00242131	1	0
chr10	107078943	107078943	SORCS1	-0.16359	0.00191702	0.874223	0.980392
chr10	114210494	114210494	TDRD1	-0.176198	0.0226358	0.874024	0.988861
chr10	114382841	114382841	AFAP1L2	0.159383	0.000753161	0.99359	0.888622
chr10	114608537	114608537	ABLIM1	0.116052	0.000729585	0.995833	0.918092
chr10	120992165	120992165	.	0.075493	0.0443861	0.992244	0.941147
chr10	122237674	122237674	TACC2	-0.103929	0.000823484	0.9298	1
chr10	123832943	123832943	CPXM2	0.12902	0.000610425	0.996032	0.909968
chr10	130656103	130656103	.	-5.67243	0.00175117	0	0.5
chr11	106461	106461	.	6.65821	0.0200539	1	0
chr11	116189	116189	.	6.65821	0.000823484	1	0
chr11	1431664	1431664	BRSK2	6.65821	0.0200539	1	0
chr11	2018848	2018848	.	6.65821	0.0200539	1	0
chr11	4335149	4335149	.	6.65821	0.0200539	1	0
chr11	20548677	20548677	.	6.65821	0.00242131	1	0
chr11	41303980	41303980	LRRC4C	6.65821	0.00242131	1	0
chr11	44364986	44364986	.	0.594853	0.00568588	0.992063	0.653478
chr11	44663695	44663695	.	6.65821	0.00242131	1	0
chr11	44663759	44663759	.	6.65821	0.0200539	1	0
chr11	46652480	46652480	ATG13	0.0949436	0.00255159	0.986111	0.922668
chr11	50363626	50363626	.	6.65821	0.00845939	1	0
chr11	51627573	51627573	.	-0.57488	0.00384464	0.668056	1
chr11	53874748	53874748	.	0.519797	0.0200539	1	0.694444
chr11	54125725	54125725	.	6.65821	0.0200539	1	0
chr11	58901118	58901118	.	2.24196	0.0452584	0.101071	0.0134804
chr11	61271302	61271302	VWCE	-0.150854	0.000823484	0.899724	1
chr11	67549002	67549002	.	-0.124165	0.00303669	0.896321	0.977778
chr11	70904263	70904263	SHANK2	-0.127888	0.0461469	0.904396	0.989153
chr11	89968421	89968421	TRIM64	6.65821	1.23942e-05	1	0
chr11	108424063	108424063	C11orf65	-0.10343	0.00105168	0.920723	0.989899
chr11	112346648	112346648	LINC02762	0.239068	0.000823484	0.994444	0.841058
chr11	112874918	112874918	.	-0.190189	0.0455561	0.860273	0.982906
chr11	131556801	131556801	NTM	-0.260197	0.048721	0.817753	0.981352
chr12	3501136	3501136	PRMT8	-6.65821	0.0200539	0	1
chr12	5901183	5901183	ANO2	-0.108956	0.0460298	0.915385	0.987979
chr12	8034625	8034625	FOXJ2	-0.228252	0.000530396	0.846277	0.993056
chr12	15953439	15953439	DERA	0.0906468	0.000823484	1	0.938493
chr12	36234545	36234545	.	-6.65821	0.000610425	0	1
chr12	36361763	36361763	.	0.985786	0.0028959	1	0.5
chr12	36431082	36431082	.	0.650717	0.00422781	1	0.633333
chr12	36825951	36825951	.	-6.65821	7.65813e-05	0	1
chr12	36978032	36978032	.	6.65821	0.00242131	1	0
chr12	37071944	37071944	.	0.577838	0.00382552	1	0.666667
chr12	37101130	37101130	.	6.65821	0.000823484	1	0
chr12	37116610	37116610	.	6.65821	0.0200539	1	0
chr12	53055675	53055675	TNS2	-0.149053	0.0449123	0.887237	0.984893
chr12	61348894	61348894	.	0.139988	0.000795948	0.993056	0.900299
chr12	65523046	65523046	LOC100507065	-0.14685	0.000823484	0.902252	1
chr12	69712894	69712894	.	-0.0717031	0.000823484	0.946433	0.995169
chr12	104024408	104024408	GLT8D2	0.114969	0.000827187	1	0.922636
chr12	110883446	110883446	CCDC63	-0.139416	0.0365758	0.895417	0.98728
chr12	111803679	111803679	ALDH2	-0.150685	0.0463136	0.886485	0.985185
chr12	114064067	114064067	.	-6.65821	0.00845939	0	1
chr12	123969593	123969593	CCDC92	-0.150314	0.0460298	0.88616	0.984568
chr12	127075334	127075334	.	0.104057	0.000795948	0.995614	0.925636
chr12	132471252	132471252	.	2.40953	0.0020247	0.080026	0.00694444
chr13	17962603	17962603	.	-3.97154	0.0114026	0	0.146875
chr13	18339697	18339697	.	6.65821	5.33332e-09	1	0
chr13	24940960	24940960	TPTE2P1	0.147377	0.00242131	0.981481	0.885199
chr13	40900857	40900857	TPTE2P5	6.65821	0.0200539	1	0
chr13	45078836	45078836	.	0.0686431	0.00105714	0.994048	0.947394
chr13	48471416	48471416	RB1	-6.65821	0.00845939	0	1
chr13	52636379	52636379	HNRNPA1L2	-0.0886602	0.00161677	0.929351	0.988889
chr13	88200360	88200360	LINC00373	-0.420128	0.00396647	0.711616	0.955556
chr13	95729222	95729222	DNAJC3	2.07827	0.0120723	1	0.229167
chr13	96310755	96310755	HS6ST3	-0.361465	0.000830944	0.776157	1
chr13	96930284	96930284	.	0.154296	0.0200539	0.991826	0.890211
chr13	109018793	109018793	MYO16	-0.0792039	0.000823484	0.946046	1
chr14	16041677	16041677	.	6.65821	0.00845939	1	0
chr14	18880780	18880780	.	-6.65821	0.00845939	0	1
chr14	18926693	18926693	.	6.65821	0.0200539	1	0
chr14	19141268	19141268	.	6.65821	1.23942e-05	1	0
chr14	19629622	19629622	.	0.767441	0.00478472	1	0.583333
chr14	34140490	34140490	.	-0.328163	0.0022186	0.765014	0.962963
chr14	70417527	70417527	.	0.0855875	0.000823484	1	0.941825
chr14	94057213	94057213	DDX24	-0.0963144	0.035444	0.927467	0.992189
chr14	94467272	94467272	SERPINA9	-0.21277	0.00240967	0.842333	0.977778
chr14	98594139	98594139	.	0.0966195	0.000659709	0.996212	0.931032
chr14	99639697	99639697	HHIPL1	0.0958511	0.0474369	0.989365	0.925126
chr14	103279130	103279130	.	-6.65821	0.00242131	0	1
chr14	103551829	103551829	.	-0.154359	0.0492085	0.881197	0.981838
chr14	103619400	103619400	.	0.159801	0.0377791	0.988492	0.883799
chr15	17279494	17279494	.	6.65821	0.00242131	1	0
chr15	17441291	17441291	.	6.65821	6.96731e-06	1	0
chr15	17521265	17521265	.	6.65821	0.00242131	1	0
chr15	17982485	17982485	.	6.65821	0.00845939	1	0
chr15	18089792	18089792	.	6.65821	0.000126305	1	0
chr15	18163311	18163311	.	6.65821	0.000795948	1	0
chr15	18235244	18235244	.	-6.65821	0.00774144	0	1
chr15	18270608	18270608	.	6.65821	0.0200539	1	0
chr15	18472685	18472685	.	-6.65821	0.0200539	0	1
chr15	18513440	18513440	.	6.65821	7.65813e-05	1	0
chr15	18757348	18757348	.	6.65821	1.23942e-05	1	0
chr15	18759110	18759110	.	-6.65821	0.000823484	0	1
chr15	18776993	18776993	.	0.577838	0.0196492	1	0.666667
chr15	18804662	18804662	.	-6.65821	7.65813e-05	0	1
chr15	19286697	19286697	.	6.65821	0.000823484	1	0
chr15	19308276	19308276	.	6.65821	0.0200539	1	0
chr15	19308280	19308280	.	6.65821	0.0200539	1	0
chr15	19442130	19442130	.	6.65821	0.0200539	1	0
chr15	19442639	19442639	.	6.65821	0.0200539	1	0
chr15	19501968	19501968	.	-6.65821	0.000795948	0	1
chr15	19591151	19591151	.	6.65821	0.0200539	1	0
chr15	20550189	20550189	.	-6.65821	7.65813e-05	0	1
chr15	20876629	20876629	.	6.65821	0.0200539	1	0
chr15	21055288	21055288	.	6.65821	0.000823484	1	0
chr15	21304895	21304895	.	1.24317	0.0339211	1	0.416667
chr15	22043524	22043524	LOC101927079	-3.63268	0.0393566	0.0714286	1
chr15	22517206	22517206	HERC2,HERC2P2	6.65821	0.00845939	1	0
chr15	22579664	22579664	HERC2,HERC2P2	6.65821	7.65813e-05	1	0
chr15	23185167	23185167	GOLGA6L22	0.155851	0.0334803	0.988043	0.885847
chr15	24134426	24134426	.	0.985786	0.000795948	1	0.5
chr15	28424118	28424118	MIR1268A	6.65821	0.0200539	1	0
chr15	28548113	28548113	.	6.65821	9.64095e-07	1	0
chr15	29119507	29119507	.	-6.65821	7.65813e-05	0	1
chr15	30540471	30540471	.	-6.65821	0.00845939	0	1
chr15	30573274	30573274	ULK4P1,ULK4P2	-6.65821	0.0200539	0	1
chr15	32366195	32366195	LOC100288637	6.65821	0.000795948	1	0
chr15	32373385	32373385	LOC100288637	-6.65821	0.000795948	0	1
chr15	33354849	33354849	RYR3	-0.148033	0.000659709	0.896228	0.994152
chr15	43803017	43803017	HYPK	-0.111634	0.0365758	0.915539	0.99
chr15	44022283	44022283	FRMD5	0.165575	0.0295277	0.988492	0.880229
chr15	51681878	51681878	SCG3	1.54494	0.00508278	0.107601	0.030303
chr15	55815832	55815832	.	0.410284	0.00500801	1	0.75
chr15	60398903	60398903	.	-6.65821	0.0200539	0	1
chr15	67514294	67514294	IQCH-AS1	0.0971896	0.000887406	1	0.934201
chr15	72661827	72661827	GOLGA6B	6.65821	7.65813e-05	1	0
chr15	73998098	73998098	PML	0.0830436	0.000823484	1	0.943505
chr15	74849871	74849871	SCAMP2	0.120548	0.000632108	0.995614	0.915002
chr15	74998478	74998478	SCAMP5	-0.169001	0.0495544	0.871881	0.981481
chr15	77039934	77039934	.	0.0985157	0.0152692	1	0.933333
chr15	84268720	84268720	.	0.767441	0.0268296	1	0.583333
chr15	84456582	84456582	GOLGA6L4,LOC102724135	6.65821	0.000610425	1	0
chr15	84463252	84463252	GOLGA6L4,LOC102724135	6.65821	0.0200539	1	0
chr15	90574409	90574409	CRTC3	-0.1398	0.0375256	0.894716	0.986772
chr15	92872440	92872440	.	-0.317646	0.00189508	0.800402	1
chr16	275905	275905	RGS11	-6.65821	0.0200539	0	1
chr16	633793	633793	WFIKKN1	0.131239	0.0257328	0.991626	0.904532
chr16	2034556	2034556	SLC9A3R2	6.65821	0.0200539	1	0
chr16	2564368	2564368	PDPK1	6.65821	0.00242131	1	0
chr16	2564384	2564384	PDPK1	6.65821	0.00242131	1	0
chr16	2984985	2984985	.	-0.123097	0.0436564	0.905673	0.987233
chr16	3144949	3144949	CASP16P	0.177179	0.000823484	1	0.883275
chr16	7380888	7380888	RBFOX1	-0.137124	0.000632108	0.903831	0.994949
chr16	10342151	10342151	.	-0.103358	0.000823484	0.930173	1
chr16	12997952	12997952	SHISA9	-0.15888	0.0451866	0.878229	0.981637
chr16	16396837	16396837	.	6.65821	0.00242131	1	0
chr16	18334872	18334872	NPIPA8,PKD1P4-NPIPA8	1.55667	0.0480277	1	0.333333
chr16	18626957	18626957	.	0.985786	0.0130077	1	0.5
chr16	18629491	18629491	.	0.641403	7.45913e-06	1	0.6375
chr16	21404512	21404512	NPIPB3	6.65821	0.00845939	1	0
chr16	21836841	21836841	NPIPB3,NPIPB4,NPIPB5	-6.65821	0.00242131	0	1
chr16	21836866	21836866	NPIPB3,NPIPB4,NPIPB5	-6.65821	0.00242131	0	1
chr16	27165209	27165209	.	-0.1949	0.0460298	0.858571	0.984205
chr16	29380338	29380338	.	6.65821	7.65813e-05	1	0
chr16	29456434	29456434	SLX1A,SLX1A-SULT1A3,SLX1B,SLX1B-SULT1A4	6.65821	0.0200539	1	0
chr16	29549026	29549026	SMG1P2	6.65821	0.00845939	1	0
chr16	30169182	30169182	.	6.65821	0.000795948	1	0
chr16	30288284	30288284	SMG1P5	6.65821	0.00242131	1	0
chr16	31104793	31104793	.	6.65821	0.00242131	1	0
chr16	32240588	32240588	.	6.65821	0.00845939	1	0
chr16	32279050	32279050	.	6.65821	0.00242131	1	0
chr16	32313505	32313505	.	0.767441	0.00478472	1	0.583333
chr16	32315995	32315995	.	-6.65821	0.00774144	0	1
chr16	32431594	32431594	.	6.65821	0.0200539	1	0
chr16	32885162	32885162	.	6.65821	0.00242131	1	0
chr16	33074339	33074339	.	6.65821	0.00774144	1	0
chr16	33108296	33108296	.	6.65821	0.00242131	1	0
chr16	33108299	33108299	.	6.65821	0.00242131	1	0
chr16	33120234	33120234	.	6.65821	0.00774144	1	0
chr16	33143568	33143568	.	-6.65821	0.00774144	0	1
chr16	33581993	33581993	.	6.65821	9.64095e-07	1	0
chr16	33803325	33803325	.	-6.65821	0.00845939	0	1
chr16	33983291	33983291	.	0.0825414	0.000823484	1	0.943837
chr16	34011231	34011231	.	0.985786	2.96985e-05	1	0.5
chr16	34431968	34431968	.	6.65821	0.000610425	1	0
chr16	34442607	34442607	.	-6.65821	0.0200539	0	1
chr16	35007766	35007766	.	-6.65821	0.000610425	0	1
chr16	35066338	35066338	.	6.65821	0.00845939	1	0
chr16	36325721	36325721	.	6.65821	0.0200539	1	0
chr16	36382033	36382033	.	-6.65821	0.000795948	0	1
chr16	36393501	36393501	.	-6.65821	0.000610425	0	1
chr16	36535938	36535938	.	6.65821	0.00845939	1	0
chr16	36670441	36670441	.	-6.65821	0.000795948	0	1
chr16	36718713	36718713	.	6.65821	0.00774144	1	0
chr16	36733316	36733316	.	6.65821	0.00242131	1	0
chr16	36753368	36753368	.	-6.65821	0.00845939	0	1
chr16	36753377	36753377	.	-6.65821	0.00845939	0	1
chr16	36796001	36796001	.	6.65821	0.00845939	1	0
chr16	36835772	36835772	.	-6.65821	0.000823484	0	1
chr16	36881424	36881424	.	6.65821	0.0200539	1	0
chr16	36881433	36881433	.	6.65821	0.0200539	1	0
chr16	36979090	36979090	.	6.65821	0.0200539	1	0
chr16	36990218	36990218	.	-6.65821	0.000795948	0	1
chr16	37069570	37069570	.	-6.65821	0.000823484	0	1
chr16	37083013	37083013	.	6.65821	0.0200539	1	0
chr16	37118649	37118649	.	-6.65821	0.00774144	0	1
chr16	37183412	37183412	.	6.65821	0.0200539	1	0
chr16	37230483	37230483	.	-6.65821	0.00845939	0	1
chr16	37280280	37280280	.	-6.65821	7.65813e-05	0	1
chr16	37368681	37368681	.	0.767441	0.000823484	1	0.583333
chr16	37386158	37386158	.	-6.65821	0.000823484	0	1
chr16	37403375	37403375	.	-6.65821	0.0200539	0	1
chr16	37417834	37417834	.	6.65821	0.000823484	1	0
chr16	37476122	37476122	.	6.65821	0.00845939	1	0
chr16	37478599	37478599	.	6.65821	0.000823484	1	0
chr16	37478608	37478608	.	6.65821	1.23942e-05	1	0
chr16	37503733	37503733	.	6.65821	0.0200539	1	0
chr16	37671517	37671517	.	6.65821	0.0200539	1	0
chr16	37716369	37716369	.	-0.985786	0.00175117	0.5	1
chr16	37928218	37928218	.	-6.65821	7.65813e-05	0	1
chr16	38112917	38112917	.	6.65821	0.0200539	1	0
chr16	38114583	38114583	.	6.65821	0.00845939	1	0
chr16	38220791	38220791	.	-6.65821	0.00845939	0	1
chr16	49211214	49211214	.	6.65821	1.23942e-05	1	0
chr16	50392793	50392793	LINC02178	-0.179455	0.0344819	0.869087	0.985528
chr16	53093694	53093694	CHD9	0.167601	0.0352487	0.987179	0.877811
chr16	55798130	55798130	.	-6.65821	0.0200539	0	1
chr16	57492304	57492304	.	-0.156822	0.000823484	0.895969	1
chr16	68912145	68912145	TANGO6	0.0944855	0.000823484	0.994444	0.930769
chr16	72497493	72497493	LINC01572	-0.199366	0.0341967	0.856279	0.984656
chr16	74385706	74385706	NPIPB15	6.65821	0.00845939	1	0
chr16	77772623	77772623	.	0.3052	0.0334773	0.977778	0.789438
chr16	78297978	78297978	WWOX	0.183815	0.022704	0.989583	0.870005
chr16	81363447	81363447	GAN	0.100956	0.000823484	1	0.931739
chr16	85803336	85803336	COX4I1	-0.160552	0.000911375	0.884592	0.989899
chr16	88915582	88915582	CBFA2T3	6.65821	0.0200539	1	0
chr16	89647892	89647892	CHMP1A	6.65821	0.0200539	1	0
chr16	89860400	89860400	SPIRE2	0.124111	0.000846689	1	0.916745
chr16	90150732	90150732	FAM157C	6.65821	0.000823484	1	0
chr17	561652	561652	VPS53	0.103331	0.000843408	1	0.93019
chr17	1020144	1020144	ABR	0.0807245	0.00121653	0.992754	0.938186
chr17	3983137	3983137	LINC01975	-0.0910297	0.000795948	0.933894	0.99537
chr17	6876475	6876475	ALOX12P2	-0.100864	0.000632108	0.928227	0.996169
chr17	7799068	7799068	DNAH2	-0.116639	0.000726424	0.916433	0.994444
chr17	8690136	8690136	.	0.0556161	0.000823484	1	0.961805
chr17	18888452	18888452	PRPSAP2	-6.65821	0.00845939	0	1
chr17	19029185	19029185	GRAP	-6.65821	0.00242131	0	1
chr17	19064956	19064956	.	6.65821	0.00845939	1	0
chr17	19193677	19193677	.	6.65821	0.0200539	1	0
chr17	20328973	20328973	CCDC144CP	-0.31464	0.00168426	0.774603	0.965812
chr17	22848436	22848436	.	-6.65821	0.000126305	0	1
chr17	22864096	22864096	.	-6.65821	1.70347e-07	0	1
chr17	22915719	22915719	.	-6.65821	0.0200539	0	1
chr17	23221981	23221981	.	0.767441	0.000554267	1	0.583333
chr17	23432290	23432290	.	6.65821	0.00774144	1	0
chr17	23453757	23453757	.	-6.65821	0.000610425	0	1
chr17	23563941	23563941	.	-6.65821	0.00845939	0	1
chr17	23590987	23590987	.	6.65821	0.0200539	1	0
chr17	23630540	23630540	.	-6.65821	0.000795948	0	1
chr17	23876687	23876687	.	0.985786	0.0130077	1	0.5
chr17	23898384	23898384	.	-6.65821	0.00774144	0	1
chr17	23898905	23898905	.	6.65821	0.000795948	1	0
chr17	24161063	24161063	.	6.65821	1.85208e-07	1	0
chr17	24182710	24182710	.	6.65821	0.0200539	1	0
chr17	24265672	24265672	.	6.65821	0.00845939	1	0
chr17	24338664	24338664	.	6.65821	0.000795948	1	0
chr17	24373092	24373092	.	0.985786	2.42896e-05	1	0.5
chr17	24399359	24399359	.	6.65821	0.00242131	1	0
chr17	24472080	24472080	.	6.65821	0.00845939	1	0
chr17	24475534	24475534	.	6.65821	0.0200539	1	0
chr17	24553702	24553702	.	-6.65821	0.000823484	0	1
chr17	24657284	24657284	.	-6.65821	0.000795948	0	1
chr17	25003211	25003211	.	0.767441	0.00478472	1	0.583333
chr17	25071232	25071232	.	6.65821	0.00845939	1	0
chr17	25156000	25156000	.	6.65821	0.0200539	1	0
chr17	25207649	25207649	.	6.65821	0.00242131	1	0
chr17	25207654	25207654	.	6.65821	0.00242131	1	0
chr17	25229615	25229615	.	6.65821	0.00845939	1	0
chr17	25481308	25481308	.	0.985786	0.0130077	1	0.5
chr17	25937989	25937989	.	6.65821	0.000823484	1	0
chr17	25960390	25960390	.	0.985786	0.0130077	1	0.5
chr17	25974560	25974560	.	-6.65821	0.00774144	0	1
chr17	25978387	25978387	.	6.65821	0.0200539	1	0
chr17	25994771	25994771	.	-6.65821	0.00845939	0	1
chr17	26065035	26065035	.	-0.985786	0.0131519	0.5	1
chr17	26223058	26223058	.	0.767441	0.0268296	1	0.583333
chr17	26320656	26320656	.	6.65821	0.000823484	1	0
chr17	26323979	26323979	.	6.65821	0.00845939	1	0
chr17	26390581	26390581	.	-0.985786	0.0131519	0.5	1
chr17	26441498	26441498	.	6.65821	0.00242131	1	0
chr17	26460399	26460399	.	-6.65821	0.00845939	0	1
chr17	26490149	26490149	.	-6.65821	0.00845939	0	1
chr17	31095380	31095380	NF1	6.65821	0.00242131	1	0
chr17	32488016	32488016	CDK5R1	-0.187499	0.0461469	0.862203	0.983254
chr17	32852620	32852620	MYO1D	-0.112874	0.0413206	0.914573	0.989815
chr17	36167645	36167645	TBC1D3B,TBC1D3D,TBC1D3G,TBC1D3H,TBC1D3I,TBC1D3L	6.65821	0.0200539	1	0
chr17	37924715	37924715	TBC1D3,TBC1D3K	6.65821	0.0200539	1	0
chr17	37924728	37924728	TBC1D3,TBC1D3K	6.65821	0.0200539	1	0
chr17	38036784	38036784	TBC1D3C	-6.65821	0.0200539	0	1
chr17	45835242	45835242	CRHR1,LINC02210-CRHR1	-0.0981741	0.000836227	0.926142	0.992063
chr17	48124174	48124174	.	0.140493	0.0277863	0.990931	0.898054
chr17	49339967	49339967	ZNF652	0.0835216	0.000823484	1	0.943189
chr17	49727386	49727386	FAM117A	0.112359	0.000823484	0.994048	0.918819
chr17	61330979	61330979	BCAS3	-0.296987	0.0471969	0.79499	0.978992
chr17	66681469	66681469	PRKCA	-0.0814444	0.000823484	0.944562	1
chr17	76544253	76544253	PRCD	2.70681	0.00111879	0.297093	0.037037
chr17	80315352	80315352	RNF213	6.65821	0.00242131	1	0
chr17	83159250	83159250	.	-0.124855	0.000717676	0.911635	0.994949
chr18	3211705	3211705	MYOM1	-0.162146	0.0492085	0.877027	0.98254
chr18	9677914	9677914	.	0.0935479	0.0445072	0.990625	0.927801
chr18	9771330	9771330	RAB31	2.18726	0.000823484	0.0575459	0.00483092
chr18	15733266	15733266	.	6.65821	0.00774144	1	0
chr18	16187797	16187797	.	6.65821	0.000823484	1	0
chr18	16345195	16345195	.	0.985786	0.0130077	1	0.5
chr18	16391120	16391120	.	6.65821	0.0200539	1	0
chr18	16428720	16428720	.	6.65821	0.000795948	1	0
chr18	16820258	16820258	.	-6.65821	4.92263e-06	0	1
chr18	16833982	16833982	.	6.65821	0.00242131	1	0
chr18	17091345	17091345	.	0.985786	0.0130077	1	0.5
chr18	17234483	17234483	.	-6.65821	0.0200539	0	1
chr18	17389891	17389891	.	0.577838	0.00382552	1	0.666667
chr18	17429774	17429774	.	6.65821	0.000823484	1	0
chr18	17452138	17452138	.	6.65821	0.0200539	1	0
chr18	17509454	17509454	.	6.65821	0.00242131	1	0
chr18	17727774	17727774	.	6.65821	7.65813e-05	1	0
chr18	17822615	17822615	.	6.65821	0.00242131	1	0
chr18	17822653	17822653	.	6.65821	0.00242131	1	0
chr18	18033751	18033751	.	6.65821	0.0200539	1	0
chr18	18161444	18161444	.	6.65821	0.000823484	1	0
chr18	18584046	18584046	.	6.65821	0.000610425	1	0
chr18	18674440	18674440	.	-6.65821	0.0200539	0	1
chr18	18685184	18685184	.	6.65821	0.000823484	1	0
chr18	18760749	18760749	.	6.65821	0.00242131	1	0
chr18	18805538	18805538	.	-6.65821	0.00845939	0	1
chr18	18874055	18874055	.	-6.65821	0.000126305	0	1
chr18	19044822	19044822	.	-6.65821	0.00845939	0	1
chr18	19477977	19477977	.	6.65821	0.00242131	1	0
chr18	19695740	19695740	.	6.65821	0.000795948	1	0
chr18	19878111	19878111	.	6.65821	0.00845939	1	0
chr18	20194057	20194057	.	6.65821	1.53176e-08	1	0
chr18	20211033	20211033	.	-6.65821	0.000795948	0	1
chr18	20326913	20326913	.	6.65821	0.0200539	1	0
chr18	20447635	20447635	.	6.65821	0.0200539	1	0
chr18	20476245	20476245	.	6.65821	0.0200539	1	0
chr18	20666354	20666354	.	-6.65821	0.00845939	0	1
chr18	37726190	37726190	.	-0.227405	4.28068e-05	0.852712	1
chr18	40938000	40938000	.	0.172233	0.000823484	0.990741	0.878125
chr18	51737669	51737669	.	0.552397	0.0126779	0.984091	0.667857
chr18	63524896	63524896	.	-0.195808	0.0411695	0.856497	0.982456
chr18	66239754	66239754	.	0.112084	0.00122004	0.989583	0.914865
chr18	66686602	66686602	.	-0.09699	0.00242131	0.918349	0.982906
chr18	68539595	68539595	.	-6.65821	0.0200539	0	1
chr18	75464964	75464964	.	0.140694	0.000645048	0.995833	0.902374
chr18	77863169	77863169	.	0.117413	0.0352487	0.990712	0.912496
chr18	79617318	79617318	.	6.65821	0.00845939	1	0
chr19	1049740	1049740	ABCA7	-6.65821	0.00845939	0	1
chr19	2817141	2817141	.	-0.107659	0.0302624	0.919725	0.991758
chr19	4107569	4107569	MAP2K2	0.154946	0.000823484	1	0.897148
chr19	4864255	4864255	PLIN3	-0.153712	0.000823484	0.897924	1
chr19	7019406	7019406	MBD3L2B	-6.65821	0.00242131	0	1
chr19	7870271	7870271	PRR36	6.65821	0.00774144	1	0
chr19	8755865	8755865	.	6.65821	0.00242131	1	0
chr19	10492160	10492160	KEAP1	-0.123972	0.000823484	0.916834	1
chr19	11463314	11463314	ELAVL3	0.135071	1.40317e-15	1	0.909731
chr19	13002340	13002340	NFIX	6.65821	0.00242131	1	0
chr19	15932241	15932241	CYP4F11	6.65821	0.00774144	1	0
chr19	16376833	16376833	EPS15L1	-0.306439	0.000795948	0.796738	0.987654
chr19	20529937	20529937	.	6.65821	0.00242131	1	0
chr19	23810175	23810175	RPSAP58	0.1858	0.000827187	1	0.877953
chr19	24440909	24440909	.	6.65821	0.000823484	1	0
chr19	30566666	30566666	ZNF536	0.121312	0.0359061	0.989881	0.909242
chr19	33409989	33409989	PEPD	0.102437	0.000795948	0.994792	0.925922
chr19	35915211	35915211	.	-0.212221	0.000823484	0.861839	1
chr19	38029401	38029401	SIPA1L3	3.23841	0.000823484	0.0843751	0
chr19	40880794	40880794	CYP2A7	6.65821	0.0200539	1	0
chr19	42610436	42610436	LIPE-AS1	6.65821	0.0200539	1	0
chr19	47955646	47955646	.	6.65821	1.23942e-05	1	0
chr19	48646278	48646278	SEC1P	-6.65821	0.00242131	0	1
chr19	58607240	58607240	.	0.985786	0.0130077	1	0.5
chr2	949795	949795	SNTG2-AS1	2.24961	0.0495715	0.101718	0.0134921
chr2	1354445	1354445	SNTG2	0.339962	0.0153027	1	0.787963
chr2	1354651	1354651	SNTG2	-0.203602	0.0337619	0.867063	1
chr2	26665536	26665536	.	6.65821	0.00845939	1	0
chr2	29920213	29920213	ALK	3.39107	0.000823484	0.0949094	0
chr2	45682993	45682993	PRKCE	0.0941601	0.000823484	1	0.936186
chr2	53146555	53146555	.	-0.308442	4.37036e-12	0.805588	1
chr2	64511202	64511202	.	0.985786	0.00242131	1	0.5
chr2	64643475	64643475	SERTAD2	2.51635	0.0426336	0.15835	0.019425
chr2	65240592	65240592	ACTR2	0.14388	0.0485392	0.985185	0.890724
chr2	66048757	66048757	.	-0.18755	6.4916e-14	0.876877	1
chr2	66072136	66072136	.	0.107473	0.0404721	0.990741	0.9189
chr2	71541016	71541016	DYSF	-0.132106	0.0498718	0.8989	0.986057
chr2	74471361	74471361	.	0.171876	0.000827187	1	0.886564
chr2	86948664	86948664	RGPD1,RGPD2	6.65821	0.00845939	1	0
chr2	87977231	87977231	RGPD1	6.65821	0.00242131	1	0
chr2	89236899	89236899	.	6.65821	0.00242131	1	0
chr2	89577643	89577643	LOC107985911	6.65821	0.00774144	1	0
chr2	92381582	92381582	.	-6.65821	0.00845939	0	1
chr2	92634027	92634027	.	6.65821	0.0200539	1	0
chr2	93010712	93010712	.	6.65821	0.000126305	1	0
chr2	93544450	93544450	.	6.65821	0.00242131	1	0
chr2	93567964	93567964	.	6.65821	0.000823484	1	0
chr2	93726843	93726843	.	6.65821	0.00774144	1	0
chr2	93729179	93729179	.	6.65821	0.00845939	1	0
chr2	93735492	93735492	.	-6.65821	0.00845939	0	1
chr2	93830819	93830819	.	-6.65821	0.00774144	0	1
chr2	93865057	93865057	.	6.65821	0.00845939	1	0
chr2	93981037	93981037	.	6.65821	0.000126305	1	0
chr2	94056402	94056402	.	6.65821	0.0200539	1	0
chr2	94074231	94074231	.	-6.65821	0.0200539	0	1
chr2	95438593	95438593	.	-6.65821	0.00845939	0	1
chr2	96036450	96036450	.	6.65821	0.000823484	1	0
chr2	97301048	97301048	.	6.65821	0.000610425	1	0
chr2	97367270	97367270	.	6.65821	0.0200539	1	0
chr2	99630235	99630235	AFF3	0.130979	0.000795948	0.994048	0.906908
chr2	105381905	105381905	FHL2	-0.106458	0.000795948	0.923667	0.995169
chr2	107790821	107790821	GACAT1	0.122282	0.000823484	0.993056	0.91154
chr2	109885507	109885507	.	6.65821	0.00242131	1	0
chr2	110016608	110016608	.	6.65821	0.000823484	1	0
chr2	110021278	110021278	.	6.65821	0.0200539	1	0
chr2	110286116	110286116	.	6.65821	0.0200539	1	0
chr2	110500502	110500502	.	6.65821	0.00845939	1	0
chr2	110507302	110507302	.	-0.985786	0.0028959	0.5	1
chr2	112282263	112282263	ZC3H6	0.102788	0.000726424	0.996212	0.927017
chr2	112607485	112607485	.	6.65821	0.000823484	1	0
chr2	113395479	113395479	.	-6.65821	0.00845939	0	1
chr2	120329999	120329999	.	-0.231415	0.0365758	0.835798	0.982955
chr2	125349404	125349404	.	0.512072	0.000823484	0.981481	0.685241
chr2	130485832	130485832	POTEI	6.65821	0.000610425	1	0
chr2	130519659	130519659	.	-6.65821	0.00774144	0	1
chr2	130550511	130550511	.	6.65821	0.00242131	1	0
chr2	130808022	130808022	.	0.182042	0.0200539	0.991402	0.87269
chr2	151047557	151047557	.	-0.128848	0.000823484	0.907356	0.993056
chr2	151917634	151917634	CACNB4	-0.142095	0.000946937	0.895195	0.988889
chr2	159043787	159043787	TANC1	0.116188	0.0445072	0.990196	0.912803
chr2	167905591	167905591	B3GALT1-AS1	-0.231007	0.000726424	0.841954	0.989899
chr2	169787155	169787155	.	-6.65821	0.00845939	0	1
chr2	175028978	175028978	.	0.110419	0.0264953	0.992142	0.918303
chr2	175914200	175914200	.	-0.147367	0.00121557	0.890123	0.986928
chr2	185864937	185864937	.	0.109596	0.000823484	1	0.926116
chr2	193339411	193339411	.	0.146404	0.000530396	0.996667	0.899523
chr2	197923236	197923236	PLCL1	6.65821	0.0200539	1	0
chr2	206356477	206356477	.	1.39142	0.00439843	1	0.375
chr2	216729802	216729802	.	3.00404	0.022614	0.572641	0.0626263
chr2	222725775	222725775	.	-0.136736	0.000823484	0.908671	1
chr2	234603099	234603099	.	-0.207405	0.0365758	0.849117	0.981944
chr2	239551351	239551351	.	-0.150855	0.000823484	0.899724	1
chr2	240306190	240306190	.	-0.201598	0.0374554	0.854811	0.984509
chr2	240694341	240694341	AQP12A	6.65821	0.000610425	1	0
chr2	240694358	240694358	AQP12A	6.65821	0.00242131	1	0
chr20	22577612	22577612	LINC00261	2.52343	0.0473308	0.117015	0.0120915
chr20	25278414	25278414	PYGB	0.0926274	0.000823484	1	0.937191
chr20	25798593	25798593	FAM182B	-6.65821	0.000610425	0	1
chr20	25813453	25813453	.	6.65821	0.0200539	1	0
chr20	25827393	25827393	.	6.65821	0.000795948	1	0
chr20	26551737	26551737	.	6.65821	0.00242131	1	0
chr20	26571794	26571794	.	6.65821	0.0200539	1	0
chr20	26701966	26701966	.	6.65821	0.000610425	1	0
chr20	26775973	26775973	.	6.65821	0.000823484	1	0
chr20	26872858	26872858	.	6.65821	0.000823484	1	0
chr20	26876000	26876000	.	6.65821	0.0200539	1	0
chr20	27117537	27117537	.	6.65821	0.0200539	1	0
chr20	27122125	27122125	.	-6.65821	7.65813e-05	0	1
chr20	27127373	27127373	.	-6.65821	0.0200539	0	1
chr20	27140972	27140972	.	6.65821	0.0200539	1	0
chr20	27313809	27313809	.	6.65821	0.00242131	1	0
chr20	27551078	27551078	.	-1.24317	0.000795948	0.416667	1
chr20	27616163	27616163	.	-6.65821	0.000823484	0	1
chr20	27665647	27665647	.	-6.65821	0.0200539	0	1
chr20	27683627	27683627	.	-6.65821	0.00242131	0	1
chr20	27711513	27711513	.	6.65821	0.0200539	1	0
chr20	27714564	27714564	.	6.65821	0.000823484	1	0
chr20	27719660	27719660	.	0.985786	0.0130077	1	0.5
chr20	27894710	27894710	.	-6.65821	0.00845939	0	1
chr20	28013087	28013087	.	6.65821	0.0200539	1	0
chr20	28099908	28099908	.	6.65821	0.0200539	1	0
chr20	28107908	28107908	.	0.985786	0.0130077	1	0.5
chr20	28282500	28282500	.	6.65821	0.0200539	1	0
chr20	28367091	28367091	.	6.65821	0.0200539	1	0
chr20	28466475	28466475	.	-6.65821	0.0200539	0	1
chr20	28473440	28473440	.	6.65821	0.00845939	1	0
chr20	31212588	31212588	.	6.65821	0.0200539	1	0
chr20	31427517	31427517	DEFB122	6.65821	0.0200539	1	0
chr20	43632627	43632627	IFT52	0.117684	0.0337373	0.990468	0.912097
chr20	45178717	45178717	.	-0.118428	0.0478895	0.909132	0.987765
chr20	46312482	46312482	.	-6.65821	0.0200539	0	1
chr20	47598203	47598203	NCOA3	0.130748	0.000823484	1	0.912492
chr20	50054957	50054957	.	-0.198145	0.000824107	0.870387	1
chr20	55864113	55864113	.	6.65821	0.00774144	1	0
chr20	57711755	57711755	NKILA	0.126787	0.00108118	1	0.915027
chr20	61929571	61929571	CDH4	0.0918521	0.000610425	0.996914	0.934805
chr20	63438172	63438172	KCNQ2	-0.253296	0.0445056	0.815575	0.974026
chr20	63652576	63652576	STMN3	-5.67243	0.00242131	0	0.5
chr21	5285152	5285152	.	0.431737	0.0192874	1	0.738783
chr21	5779030	5779030	.	-6.65821	0.0200539	0	1
chr21	6091403	6091403	LINC00319	6.65821	0.0200539	1	0
chr21	6091408	6091408	LINC00319	6.65821	0.0200539	1	0
chr21	6151108	6151108	.	6.65821	0.00845939	1	0
chr21	6151543	6151543	.	-6.65821	0.0200539	0	1
chr21	6151961	6151961	.	6.65821	0.00845939	1	0
chr21	6334939	6334939	.	6.65821	9.64095e-07	1	0
chr21	8205259	8205259	LOC100507412	-6.65821	0.0200539	0	1
chr21	8207652	8207652	LOC100507412,RNA45SN2	-5.50603	0.0200539	0	0.444444
chr21	8212581	8212581	LOC100507412,RNA45SN2	-5.67243	0.000795948	0	0.5
chr21	8388540	8388540	LOC100507412,RNA28SN5	-6.65821	0.00845939	0	1
chr21	8446059	8446059	RNA28SN1,RNA28SN2,RNA28SN5,RNA45SN1,RNA45SN5	-6.65821	0.000795948	0	1
chr21	9831029	9831029	.	0.410284	0.0200539	1	0.75
chr21	15714352	15714352	.	-0.116375	0.0378727	0.912969	0.990505
chr21	17384258	17384258	.	0.183558	0.00734977	1	0.879334
chr21	24122268	24122268	.	0.097428	0.0365182	0.992244	0.926795
chr21	25966865	25966865	APP	-0.0916426	0.000823484	0.933305	0.995169
chr21	33838922	33838922	ITSN1	-0.122173	0.00091431	0.910429	0.99177
chr21	37051106	37051106	.	0.158062	0.0365758	0.98989	0.886129
chr21	43381198	43381198	.	6.65821	0.00845939	1	0
chr21	43478190	43478190	LINC00313,LINC01669	-6.65821	0.00774144	0	1
chr21	43489951	43489951	.	6.65821	0.000610425	1	0
chr21	43563688	43563688	HSF2BP	-6.65821	0.00845939	0	1
chr21	43608873	43608873	HSF2BP	0.163486	0.0451866	0.986472	0.879715
chr21	43796704	43796704	RRP1	0.115906	0.000823484	1	0.922031
chr21	44121289	44121289	LOC102724159,PWP2	6.65821	0.0200539	1	0
chr21	44127538	44127538	LOC102724159,PWP2	0.442274	0.0373328	1	0.733333
chr21	44154263	44154263	.	6.65821	0.00774144	1	0
chr21	44157795	44157795	.	-4.14296	0.0271376	0	0.166667
chr21	44157801	44157801	.	-4.14296	0.0271376	0	0.166667
chr21	44202943	44202943	.	-6.65821	0.0200539	0	1
chr21	44203337	44203337	.	6.65821	0.00845939	1	0
chr21	44215829	44215829	.	6.65821	0.0200539	1	0
chr21	44230220	44230220	ICOSLG,LOC102723996	0.264507	0.0200539	1	0.830808
chr21	46069069	46069069	.	-0.363591	0.0341541	0.775	1
chr21	46145842	46145842	FTCD	1.95777	0.0204097	1	0.25
chr22	10526629	10526629	.	6.65821	0.00242131	1	0
chr22	15255289	15255289	.	6.65821	0.00845939	1	0
chr22	15526937	15526937	.	6.65821	0.000795948	1	0
chr22	16335126	16335126	.	0.669527	0.040584	1	0.625
chr22	16362767	16362767	.	6.65821	0.000610425	1	0
chr22	16373321	16373321	.	6.65821	0.00845939	1	0
chr22	16519773	16519773	.	6.65821	0.0200539	1	0
chr22	18500878	18500878	.	0.542734	0.0153492	1	0.683333
chr22	18763237	18763237	.	-6.65821	0.00845939	0	1
chr22	18782206	18782206	GGT3P	0.767441	0.000823484	1	0.583333
chr22	18806234	18806234	.	-6.65821	0.0200539	0	1
chr22	19439960	19439960	.	0.0639096	0.000836227	1	0.956235
chr22	20968071	20968071	AIFM3	6.65821	0.00774144	1	0
chr22	21121137	21121137	BCRP2	-6.65821	0.0200539	0	1
chr22	21384789	21384789	RIMBP3B,RIMBP3C	-6.65821	0.0200539	0	1
chr22	21384898	21384898	RIMBP3B,RIMBP3C	-6.65821	0.00242131	0	1
chr22	21384900	21384900	RIMBP3B,RIMBP3C	-6.65821	0.00242131	0	1
chr22	21385376	21385376	RIMBP3B,RIMBP3C	-6.65821	0.0200539	0	1
chr22	21385397	21385397	RIMBP3B,RIMBP3C	-6.65821	0.0200539	0	1
chr22	21385769	21385769	RIMBP3B,RIMBP3C	-6.65821	0.0200539	0	1
chr22	21385778	21385778	RIMBP3B,RIMBP3C	-6.65821	0.0200539	0	1
chr22	21554151	21554151	UBE2L3	6.65821	0.0200539	1	0
chr22	33306065	33306065	LARGE1	0.177657	0.000843408	1	0.882979
chr22	43343015	43343015	SCUBE1	-6.08037	0.00892082	0	0.666667
chr22	46995233	46995233	TBC1D22A	0.0836379	0.000824107	1	0.943112
chr22	50562454	50562454	SYCE3	6.65821	0.00845939	1	0
chr3	218829	218829	CHL1	-0.180634	0.000830944	0.872969	0.990741
chr3	16704117	16704117	.	0.107562	0.000830944	1	0.927437
chr3	18730679	18730679	.	-0.123483	0.000830219	0.910349	0.992593
chr3	26402851	26402851	.	6.65821	0.0200539	1	0
chr3	27093398	27093398	.	6.65821	0.0200539	1	0
chr3	28903623	28903623	.	0.104298	0.000823484	0.993333	0.923359
chr3	34653111	34653111	.	6.65821	0.000823484	1	0
chr3	37884816	37884816	CTDSPL	0.249404	0.000610425	0.993056	0.833814
chr3	45652392	45652392	LIMD1	-0.0678509	0.000823484	0.953599	1
chr3	46626183	46626183	FAM240A	-0.163879	0.000823484	0.891548	1
chr3	47256527	47256527	KIF9	6.65821	0.0200539	1	0
chr3	47257811	47257811	KIF9	0.095448	0.0409906	0.991004	0.926921
chr3	48907098	48907098	.	0.132988	0.031857	0.990079	0.902013
chr3	51480371	51480371	DCAF1	0.0977092	0.000830944	1	0.933861
chr3	52802145	52802145	ITIH3	-0.414932	0.0440967	0.711442	0.951852
chr3	59613551	59613551	.	0.0547306	0.00397809	0.986842	0.949734
chr3	59770214	59770214	FHIT	0.0636936	0.0440967	0.993552	0.95021
chr3	60958028	60958028	FHIT	0.12613	1.73559e-15	1	0.915449
chr3	62849885	62849885	CADPS	-0.573614	0.00871846	0.668651	1
chr3	71853075	71853075	.	0.0804796	0.0486245	0.99131	0.936982
chr3	73385103	73385103	PDZRN3	-0.0867331	0.00529073	0.920144	0.977778
chr3	76730785	76730785	ROBO2	6.65821	0.0200539	1	0
chr3	87813701	87813701	HTR1F	-0.18538	6.4916e-14	0.878212	1
chr3	90309943	90309943	.	0.170207	0.0379144	0.985839	0.875017
chr3	90957516	90957516	.	-0.767441	0.00478472	0.583333	1
chr3	91021412	91021412	.	0.3498	0.0343698	1	0.78254
chr3	91649575	91649575	.	6.65821	0.00774144	1	0
chr3	91689297	91689297	.	6.65821	0.000610425	1	0
chr3	91697898	91697898	.	-6.65821	0.00845939	0	1
chr3	91737212	91737212	.	6.65821	0.00845939	1	0
chr3	91813836	91813836	.	0.179363	1.45476e-05	1	0.881924
chr3	91845645	91845645	.	6.65821	0.00845939	1	0
chr3	91851576	91851576	.	6.65821	0.00242131	1	0
chr3	91851611	91851611	.	6.65821	0.00242131	1	0
chr3	92001599	92001599	.	-6.65821	0.00845939	0	1
chr3	92008148	92008148	.	6.65821	0.0200539	1	0
chr3	92094095	92094095	.	-6.65821	7.65813e-05	0	1
chr3	92105843	92105843	.	6.65821	0.0200539	1	0
chr3	92207059	92207059	.	6.65821	0.00242131	1	0
chr3	92301703	92301703	.	6.65821	0.00242131	1	0
chr3	92413635	92413635	.	6.65821	0.0200539	1	0
chr3	92413824	92413824	.	6.65821	0.00242131	1	0
chr3	92421007	92421007	.	-0.419352	0.0019757	0.745238	1
chr3	92423182	92423182	.	6.65821	1.03104e-05	1	0
chr3	92678947	92678947	.	6.65821	0.0200539	1	0
chr3	92695473	92695473	.	6.65821	0.000795948	1	0
chr3	92698515	92698515	.	6.65821	1.23942e-05	1	0
chr3	92764884	92764884	.	-6.65821	0.00774144	0	1
chr3	92853915	92853915	.	6.65821	7.41143e-08	1	0
chr3	93093443	93093443	.	6.65821	1.23942e-05	1	0
chr3	93122069	93122069	.	6.65821	0.0200539	1	0
chr3	93258813	93258813	.	6.65821	0.0200539	1	0
chr3	93274107	93274107	.	6.65821	0.00845939	1	0
chr3	93275866	93275866	.	6.65821	0.0200539	1	0
chr3	93383308	93383308	.	6.65821	0.00242131	1	0
chr3	93638119	93638119	.	6.65821	0.00242131	1	0
chr3	93638467	93638467	.	6.65821	0.00774144	1	0
chr3	98259787	98259787	.	0.165616	0.0466561	0.984091	0.876279
chr3	98837768	98837768	DCBLD2	6.65821	0.0200539	1	0
chr3	121401750	121401750	STXBP5L	-6.65821	0.00845939	0	1
chr3	124366921	124366921	KALRN	-6.65821	0.00845939	0	1
chr3	133415890	133415890	BFSP2	6.65821	0.0200539	1	0
chr3	139033489	139033489	.	-0.180865	0.000830219	0.880996	1
chr3	150331983	150331983	.	-0.15061	0.00066714	0.895874	0.995556
chr3	151130664	151130664	MED12L	-0.0866864	0.00191631	0.930637	0.988889
chr3	162123897	162123897	.	0.141167	0.00240967	0.983333	0.89074
chr3	173697781	173697781	NLGN1	0.116061	0.0476437	0.989236	0.911999
chr3	179554279	179554279	.	-0.137475	0.00168426	0.895574	0.986111
chr3	183608571	183608571	.	6.65821	0.0200539	1	0
chr3	192686478	192686478	FGF12	-0.139928	0.00186268	0.893194	0.985185
chr3	195725397	195725397	MUC20	6.65821	0.0200539	1	0
chr3	195767746	195767746	MUC4	6.65821	0.000610425	1	0
chr3	197751559	197751559	FYTTD1	3.48152	0.000854388	0.101697	0
chr3	198099589	198099589	.	0.985786	0.0130077	1	0.5
chr4	1948458	1948458	NSD2	0.0820202	0.000823484	0.994792	0.939261
chr4	3510672	3510672	LRPAP1	0.0864908	0.000823484	1	0.941229
chr4	3787693	3787693	.	0.201057	0.0332146	0.985839	0.856293
chr4	6410249	6410249	PPP2R2C	0.115493	0.0492706	0.988587	0.911762
chr4	9169580	9169580	.	0.251263	0.0312476	1	0.838562
chr4	10991504	10991504	.	-0.299614	0.000886173	0.810594	1
chr4	11582667	11582667	.	0.098085	0.0338278	0.992409	0.926523
chr4	12469781	12469781	.	0.128324	0.000795948	0.99359	0.908178
chr4	20099932	20099932	.	-0.177138	0.000823484	0.883301	1
chr4	37116056	37116056	.	-0.12272	0.0402217	0.905733	0.987037
chr4	41263771	41263771	UCHL1	-0.11467	0.000795948	0.917128	0.993827
chr4	41511596	41511596	LIMCH1	-0.201835	0.000823484	0.861238	0.992063
chr4	42111455	42111455	BEND4	0.122325	0.0332146	0.991447	0.910036
chr4	45830436	45830436	.	0.152818	0.000823484	1	0.898486
chr4	49123829	49123829	.	0.442274	0.0373328	1	0.733333
chr4	49758005	49758005	.	0.767441	0.0268296	1	0.583333
chr4	50042723	50042723	.	6.65821	0.0200539	1	0
chr4	50102945	50102945	.	-6.65821	0.000126305	0	1
chr4	50345555	50345555	.	-6.65821	0.0200539	0	1
chr4	50460346	50460346	.	6.65821	0.0200539	1	0
chr4	50568291	50568291	.	-6.65821	0.00845939	0	1
chr4	50568300	50568300	.	-6.65821	0.00845939	0	1
chr4	50602810	50602810	.	0.638312	0.000823484	1	0.638889
chr4	50616639	50616639	.	-6.65821	0.0200539	0	1
chr4	50659776	50659776	.	6.65821	0.00845939	1	0
chr4	50670339	50670339	.	-6.65821	0.00242131	0	1
chr4	50692436	50692436	.	6.65821	0.00845939	1	0
chr4	50743977	50743977	.	6.65821	0.0200539	1	0
chr4	50798175	50798175	.	0.767441	0.00478472	1	0.583333
chr4	50983157	50983157	.	6.65821	0.0200539	1	0
chr4	51004401	51004401	.	-0.669527	0.040584	0.625	1
chr4	51102021	51102021	.	6.65821	0.000126305	1	0
chr4	51132636	51132636	.	-6.65821	0.00774144	0	1
chr4	51132645	51132645	.	-6.65821	0.00774144	0	1
chr4	51153214	51153214	.	6.65821	0.0200539	1	0
chr4	51153223	51153223	.	6.65821	0.0200539	1	0
chr4	51385364	51385364	.	0.211218	0.00259003	1	0.862446
chr4	51546396	51546396	.	6.65821	0.0200539	1	0
chr4	51589286	51589286	.	6.65821	0.00774144	1	0
chr4	51594403	51594403	.	6.65821	0.00845939	1	0
chr4	51604399	51604399	.	6.65821	0.0200539	1	0
chr4	51630449	51630449	.	-6.65821	0.0200539	0	1
chr4	51726688	51726688	.	6.65821	0.000823484	1	0
chr4	52465252	52465252	.	-6.65821	0.000795948	0	1
chr4	53210961	53210961	SCFD2	0.128445	0.0349516	0.988154	0.903128
chr4	54169932	54169932	.	6.65821	0.00242131	1	0
chr4	78349273	78349273	FRAS1	6.65821	0.0200539	1	0
chr4	80988357	80988357	.	0.0798159	0.000827187	1	0.94564
chr4	83547409	83547409	GPAT3	0.169842	0.0420337	0.984681	0.874212
chr4	85443756	85443756	.	0.1228	0.000806431	0.99537	0.913336
chr4	115149198	115149198	.	0.174504	0.0263588	0.989542	0.875667
chr4	122163424	122163424	KIAA1109	-0.0678958	0.000823484	0.953569	1
chr4	122366066	122366066	.	-0.145166	0.000827187	0.903318	1
chr4	122812506	122812506	.	6.65821	0.000610425	1	0
chr4	152134044	152134044	.	-0.118046	0.040584	0.910308	0.988777
chr4	163571946	163571946	MARCHF1	0.149003	5.15053e-14	1	0.900892
chr4	172510370	172510370	GALNTL6	-0.252082	0.00845939	0.838081	1
chr4	186823668	186823668	.	0.170848	0.0274832	0.989815	0.878156
chr4	187598959	187598959	LINC02492	-2.60698	0.0436564	0.0989583	0.653806
chr4	187679232	187679232	.	-2.85667	0.0310137	0.0804094	0.644875
chr4	189660862	189660862	LINC01262	0.233956	0.000440341	0.994444	0.844079
chr4	190090580	190090580	.	6.65821	0.00845939	1	0
chr5	1192928	1192928	.	-6.65821	0.0200539	0	1
chr5	1332518	1332518	CLPTM1L	-0.099006	0.000823484	0.933013	1
chr5	10248092	10248092	ATPSCKMT	0.106559	0.0358569	0.991447	0.920145
chr5	32208739	32208739	.	6.65821	0.00242131	1	0
chr5	38784015	38784015	OSMR-AS1	0.11325	0.000894131	1	0.923748
chr5	40800515	40800515	.	6.65821	0.0200539	1	0
chr5	43087345	43087345	LOC100506639	6.65821	0.00845939	1	0
chr5	46502606	46502606	.	-6.65821	0.00845939	0	1
chr5	46832659	46832659	.	-6.65821	0.00774144	0	1
chr5	46944618	46944618	.	6.65821	6.96731e-06	1	0
chr5	47195211	47195211	.	6.65821	0.00242131	1	0
chr5	47293461	47293461	.	6.65821	0.0200539	1	0
chr5	60926076	60926076	ERCC8	0.0974435	0.0384509	0.991204	0.925813
chr5	63408884	63408884	.	6.65821	0.00242131	1	0
chr5	63408900	63408900	.	6.65821	0.0200539	1	0
chr5	64772764	64772764	CWC27	0.17084	1.40317e-15	1	0.887209
chr5	69348565	69348565	.	0.108705	0.0381124	0.990406	0.917796
chr5	69766167	69766167	.	1.24317	0.00325483	1	0.416667
chr5	70651094	70651094	.	6.65821	0.00242131	1	0
chr5	73446854	73446854	FOXD1	2.89075	0.000795948	0.127555	0.00854701
chr5	74353248	74353248	.	1.24317	0.0200539	1	0.416667
chr5	76984969	76984969	.	6.65821	0.000610425	1	0
chr5	76984974	76984974	.	6.65821	0.000610425	1	0
chr5	76985029	76985029	.	6.65821	0.00242131	1	0
chr5	77043303	77043303	AGGF1	6.65821	0.0200539	1	0
chr5	78801569	78801569	ARSB	-0.0941908	0.000934079	0.93164	0.995169
chr5	97131836	97131836	LIX1	0.0736345	0.046252	0.992754	0.942858
chr5	100355231	100355231	.	1.55667	0.0200539	1	0.333333
chr5	104518963	104518963	.	-6.65821	0.000795948	0	1
chr5	124705364	124705364	ZNF608	-0.228598	2.29861e-09	0.851998	1
chr5	130474941	130474941	.	-0.179882	0.0402541	0.86798	0.984568
chr5	132514813	132514813	.	6.65821	0.0200539	1	0
chr5	134583515	134583515	.	-0.113406	0.0497932	0.916273	0.992023
chr5	150572491	150572491	.	-0.188988	0.0445056	0.861533	0.983516
chr5	150624756	150624756	SYNPO	-6.65821	0.0200539	0	1
chr5	165697541	165697541	.	0.892641	0.034528	1	0.534014
chr5	168998501	168998501	SLIT3	-0.247882	0.0327787	0.827118	0.984046
chr5	172935357	172935357	ERGIC1	-0.178291	0.0474369	0.867114	0.982492
chr5	176016657	176016657	.	6.65821	0.00242131	1	0
chr5	177613583	177613583	.	-0.127502	0.000823484	0.914569	1
chr5	177924996	177924996	.	0.985786	0.0130077	1	0.5
chr5	178577058	178577058	COL23A1	3.55758	0.000823484	0.107744	0
chr5	180385312	180385312	.	6.65821	0.0200539	1	0
chr5	180617268	180617268	FLT4	-6.65821	0.0200539	0	1
chr5	181097718	181097718	.	-6.65821	0.0200539	0	1
chr5	181104079	181104079	.	6.65821	0.00845939	1	0
chr5	181281697	181281697	.	-6.65821	0.00845939	0	1
chr5	181417700	181417700	.	6.65821	0.00845939	1	0
chr6	909909	909909	.	6.65821	0.00845939	1	0
chr6	1088068	1088068	LINC01622	0.116741	0.000823484	1	0.921491
chr6	4019893	4019893	.	0.0949227	0.000823484	0.994444	0.930484
chr6	4565500	4565500	.	-0.130139	0.0020426	0.898377	0.984127
chr6	7803178	7803178	BMP6	-0.138418	0.000823484	0.9076	1
chr6	8864016	8864016	.	-0.172403	1.86995e-13	0.886237	1
chr6	20731172	20731172	CDKAL1	0.0748141	0.0440967	0.99221	0.941563
chr6	26698571	26698571	.	6.65821	0.000795948	1	0
chr6	27827465	27827465	.	-6.65821	0.000795948	0	1
chr6	27827469	27827469	.	-6.65821	0.000795948	0	1
chr6	32200974	32200974	NOTCH4	-0.0926854	0.000823484	0.937153	1
chr6	34407822	34407822	RPS10-NUDT3	-0.10932	0.000823484	0.926295	1
chr6	35779388	35779388	CLPSL2	0.093523	0.000827187	1	0.936604
chr6	37144205	37144205	.	-0.188476	0.000823484	0.876308	1
chr6	41852960	41852960	USP49	0.0835404	0.000823484	1	0.943176
chr6	57924534	57924534	GUSBP4,LINC00680-GUSBP4	-0.092503	0.000823484	0.937273	1
chr6	58572017	58572017	.	0.985786	0.0200539	1	0.5
chr6	58632286	58632286	.	-6.65821	0.000126305	0	1
chr6	58632295	58632295	.	-6.65821	0.000126305	0	1
chr6	58635255	58635255	.	6.65821	0.0200539	1	0
chr6	58827304	58827304	.	0.701432	0.00274013	1	0.611111
chr6	58831244	58831244	.	6.65821	0.00242131	1	0
chr6	59017851	59017851	.	6.65821	0.00242131	1	0
chr6	59105459	59105459	.	6.65821	0.00845939	1	0
chr6	59205803	59205803	.	6.65821	0.00845939	1	0
chr6	59238973	59238973	.	6.65821	0.00242131	1	0
chr6	59301918	59301918	.	6.65821	0.00845939	1	0
chr6	59301932	59301932	.	6.65821	0.0200539	1	0
chr6	59302070	59302070	.	6.65821	0.0200539	1	0
chr6	59318061	59318061	.	6.65821	0.0200539	1	0
chr6	59318158	59318158	.	6.65821	7.65813e-05	1	0
chr6	59363717	59363717	.	0.985786	0.0131519	1	0.5
chr6	59371188	59371188	.	6.65821	0.000126305	1	0
chr6	59434840	59434840	.	0.615474	0.00242131	1	0.649242
chr6	59574854	59574854	.	6.65821	0.0200539	1	0
chr6	59595069	59595069	.	6.65821	0.00845939	1	0
chr6	59673917	59673917	.	6.65821	0.0200539	1	0
chr6	59696565	59696565	.	6.65821	0.00774144	1	0
chr6	59772919	59772919	.	-6.65821	0.000823484	0	1
chr6	75738327	75738327	.	-0.109706	0.000836227	0.926045	1
chr6	80176948	80176948	BCKDHB	-0.116726	0.0461296	0.909766	0.987276
chr6	82224146	82224146	IBTK	0.0903154	0.000795948	0.995833	0.934797
chr6	112705871	112705871	.	-6.65821	0.0200539	0	1
chr6	114341134	114341134	.	6.65821	0.00845939	1	0
chr6	122847993	122847993	.	2.7241	0.0184284	1	0.142857
chr6	125389890	125389890	.	6.65821	0.0200539	1	0
chr6	129581322	129581322	ARHGAP18	0.0934796	0.000846689	1	0.936632
chr6	134386594	134386594	.	-0.1266	0.000823484	0.907319	0.991453
chr6	139733963	139733963	.	-0.186205	4.37036e-12	0.877704	1
chr6	140044646	140044646	LOC100507477	-6.65821	0.00774144	0	1
chr6	143315159	143315159	AIG1	0.209465	0.0445072	0.986869	0.85215
chr6	150197770	150197770	PPP1R14C	0.141611	0.0390991	0.988095	0.89478
chr6	151450392	151450392	RMND1	6.65821	0.00242131	1	0
chr6	160843833	160843833	.	-2.38404	0.045174	0.174206	0.951548
chr6	167470197	167470197	LOC105378127	-0.153882	0.0386618	0.886817	0.987762
chr6	170214004	170214004	.	6.65821	0.000823484	1	0
chr6	170216793	170216793	.	6.65821	0.00242131	1	0
chr7	1146058	1146058	.	-6.65821	0.0200539	0	1
chr7	1938053	1938053	MAD1L1	6.65821	0.0200539	1	0
chr7	4593357	4593357	.	-6.65821	0.0200539	0	1
chr7	5992382	5992382	PMS2	-0.111543	0.000823484	0.924853	1
chr7	14831826	14831826	DGKB	-0.265832	0.0384891	0.810684	0.976733
chr7	25410320	25410320	.	-0.211044	0.036307	0.849295	0.984656
chr7	27384351	27384351	.	0.110927	0.000823484	0.99359	0.919317
chr7	27743837	27743837	TAX1BP1	6.65821	0.0200539	1	0
chr7	30118894	30118894	PLEKHA8	-0.101467	0.0424093	0.92249	0.990435
chr7	31895738	31895738	PDE1C	-0.19864	0.000823484	0.870085	1
chr7	36642375	36642375	AOAH	0.0893686	0.0474369	0.990406	0.930315
chr7	38337699	38337699	.	-0.227409	0.00135407	0.833728	0.977778
chr7	40039711	40039711	CDK13	0.0674167	0.000823484	1	0.953889
chr7	52177293	52177293	.	3.18476	0.000823484	0.642229	0.0617284
chr7	56949312	56949312	.	6.65821	0.00845939	1	0
chr7	57000412	57000412	.	0.333281	0.0389793	1	0.791667
chr7	57004395	57004395	.	0.767441	0.0268296	1	0.583333
chr7	57021144	57021144	.	6.65821	0.0200539	1	0
chr7	57073227	57073227	.	-6.65821	0.00774144	0	1
chr7	57833091	57833091	.	6.65821	0.000795948	1	0
chr7	58214809	58214809	.	6.65821	0.000795948	1	0
chr7	58231270	58231270	.	6.65821	0.00242131	1	0
chr7	58428493	58428493	.	6.65821	0.0200539	1	0
chr7	58458117	58458117	.	6.65821	0.00845939	1	0
chr7	58480795	58480795	.	6.65821	1.23942e-05	1	0
chr7	58536631	58536631	.	-6.65821	0.00845939	0	1
chr7	58541827	58541827	.	6.65821	0.00845939	1	0
chr7	58543139	58543139	.	0.49163	0.0299709	1	0.708333
chr7	58701827	58701827	.	6.65821	0.00242131	1	0
chr7	58777855	58777855	.	6.65821	0.000126305	1	0
chr7	58867192	58867192	.	6.65821	0.0200539	1	0
chr7	59050473	59050473	.	6.65821	0.00242131	1	0
chr7	59079950	59079950	.	0.193844	0.0471969	1	0.873016
chr7	59116091	59116091	.	-6.65821	0.00845939	0	1
chr7	59237446	59237446	.	6.65821	0.00845939	1	0
chr7	59376790	59376790	.	6.65821	0.0200539	1	0
chr7	59478584	59478584	.	-6.65821	0.000126305	0	1
chr7	59495536	59495536	.	6.65821	0.0200539	1	0
chr7	59559124	59559124	.	6.65821	0.00845939	1	0
chr7	59653901	59653901	.	6.65821	0.00845939	1	0
chr7	59698595	59698595	.	6.65821	7.65813e-05	1	0
chr7	59765691	59765691	.	6.65821	0.00845939	1	0
chr7	59797926	59797926	.	-6.65821	0.00845939	0	1
chr7	59839480	59839480	.	6.65821	0.0200539	1	0
chr7	59887853	59887853	.	6.65821	0.0200539	1	0
chr7	59974646	59974646	.	6.65821	7.65813e-05	1	0
chr7	59999979	59999979	.	-6.65821	0.000126305	0	1
chr7	60020839	60020839	.	6.65821	0.00845939	1	0
chr7	60271231	60271231	.	6.65821	0.000126305	1	0
chr7	60392107	60392107	.	0.985786	0.0028959	1	0.5
chr7	60537234	60537234	.	6.65821	0.000126305	1	0
chr7	60545533	60545533	.	6.65821	0.0200539	1	0
chr7	60570174	60570174	.	-6.65821	0.0200539	0	1
chr7	60887498	60887498	.	6.65821	0.0200539	1	0
chr7	61120951	61120951	.	0.204255	0.0091547	1	0.866667
chr7	61415112	61415112	.	0.985786	0.0200539	1	0.5
chr7	61486590	61486590	.	6.65821	9.64095e-07	1	0
chr7	63316649	63316649	.	6.65821	0.000823484	1	0
chr7	63354234	63354234	.	-6.65821	0.000795948	0	1
chr7	63551435	63551435	.	6.65821	0.000126305	1	0
chr7	63557305	63557305	.	6.65821	0.0200539	1	0
chr7	65359790	65359790	.	0.100017	0.000823484	0.994792	0.927493
chr7	70202280	70202280	AUTS2	6.65821	0.000795948	1	0
chr7	74850779	74850779	GTF2IRD2	-6.65821	0.0200539	0	1
chr7	75124951	75124951	GTF2IRD2B	6.65821	0.00845939	1	0
chr7	75222863	75222863	GTF2IP1	6.65821	0.0200539	1	0
chr7	75357373	75357373	PMS2P2,PMS2P7	6.65821	0.00774144	1	0
chr7	81784907	81784907	.	0.198313	0.000823484	1	0.870285
chr7	83901974	83901974	.	-0.239523	0.0304008	0.82981	0.981481
chr7	97026722	97026722	.	3.21145	0.000827187	0.0826282	0
chr7	99736875	99736875	.	0.116486	0.0443526	0.990278	0.912688
chr7	100997587	100997587	MUC12	6.65821	0.000610425	1	0
chr7	102493957	102493957	RASA4B	-4.55459	0.00646195	0	0.225
chr7	102549465	102549465	POLR2J3	6.65821	0.00845939	1	0
chr7	110707161	110707161	IMMP2L	-6.65821	0.000795948	0	1
chr7	117207167	117207167	ST7,ST7-OT3	0.0780133	0.000830944	0.994048	0.941196
chr7	120901821	120901821	.	-0.14603	0.000806431	0.895599	0.992063
chr7	127263141	127263141	.	-0.0885068	0.000823484	0.934924	0.994709
chr7	130461219	130461219	.	-0.162864	0.0471969	0.877295	0.983333
chr7	131625702	131625702	.	-0.158572	0.0312476	0.883485	0.987291
chr7	133532052	133532052	EXOC4	0.0973964	0.000823484	1	0.934065
chr7	146909909	146909909	CNTNAP2	-6.65821	0.000795948	0	1
chr7	155454775	155454775	.	2.50952	0.0456611	0.126031	0.0138889
chr7	157476454	157476454	LOC101927914	0.410334	0.0422961	0.964583	0.723325
chr7	157859403	157859403	PTPRN2,PTPRN2-AS1	6.65821	0.0200539	1	0
chr7	158276309	158276309	PTPRN2	6.65821	1.23942e-05	1	0
chr7	158334313	158334313	PTPRN2	6.65821	0.000126305	1	0
chr7	158351975	158351975	PTPRN2	6.65821	0.000126305	1	0
chr7	159230348	159230348	.	0.127046	0.0224332	0.991898	0.907443
chr8	60498	60498	.	-6.65821	0.000823484	0	1
chr8	1471096	1471096	DLGAP2	6.65821	1.03104e-05	1	0
chr8	2301206	2301206	.	6.65821	0.00845939	1	0
chr8	2404083	2404083	.	6.65821	0.00845939	1	0
chr8	7299005	7299005	FAM66B	0.577838	0.00435367	1	0.666667
chr8	7559333	7559333	.	6.65821	0.0200539	1	0
chr8	7559355	7559355	.	6.65821	0.0200539	1	0
chr8	7582298	7582298	.	6.65821	0.0200539	1	0
chr8	7970817	7970817	FAM66E	-6.65821	0.00242131	0	1
chr8	8086490	8086490	.	-6.65821	0.000795948	0	1
chr8	8227974	8227974	.	-3.93411	0.000726424	0	0.142857
chr8	8833489	8833489	MFHAS1	-0.786001	0.00122866	0.546215	0.949074
chr8	8980062	8980062	.	4.5196	0.0452221	0.41541	0.00854701
chr8	9059948	9059948	ERI1	-0.113928	1.99255e-14	0.92331	1
chr8	9933632	9933632	.	-2.7071	0.00242131	0.0357143	0.288517
chr8	10125517	10125517	MSRA	-0.0850337	0.000823484	0.94219	1
chr8	22702447	22702447	.	-0.347154	0.000823484	0.783995	1
chr8	30624304	30624304	GTF2E2	0.0781417	0.000717676	0.996914	0.943826
chr8	37927129	37927129	.	-6.65821	0.00845939	0	1
chr8	40220522	40220522	.	-0.250266	0.000795948	0.829807	0.988889
chr8	40846786	40846786	ZMAT4	0.15107	0.035757	0.987637	0.888455
chr8	44041029	44041029	.	6.65821	0.00774144	1	0
chr8	44449739	44449739	.	6.65821	0.0200539	1	0
chr8	44512908	44512908	.	-6.65821	0.00845939	0	1
chr8	44896938	44896938	.	0.360963	0.00710522	1	0.776431
chr8	45024451	45024451	.	-6.65821	0.00845939	0	1
chr8	45108036	45108036	.	6.65821	0.00845939	1	0
chr8	45327719	45327719	.	-6.65821	0.00845939	0	1
chr8	45357316	45357316	.	6.65821	0.00845939	1	0
chr8	45409500	45409500	.	6.65821	0.0200539	1	0
chr8	45481895	45481895	.	-6.65821	0.0200539	0	1
chr8	45568022	45568022	.	6.65821	0.000823484	1	0
chr8	45595196	45595196	.	6.65821	7.65813e-05	1	0
chr8	45765747	45765747	.	-6.65821	0.00845939	0	1
chr8	45811917	45811917	.	6.65821	0.0200539	1	0
chr8	45944780	45944780	.	0.296268	0.000121854	1	0.8125
chr8	47644003	47644003	SPIDR	0.0750542	0.0473973	0.991647	0.94087
chr8	47837220	47837220	PRKDC	0.072353	0.0020247	0.990741	0.94179
chr8	55889002	55889002	LYN	-0.184803	0.0363681	0.867386	0.987291
chr8	71217616	71217616	EYA1	-0.137879	0.0010894	0.896723	0.987654
chr8	82215655	82215655	.	0.0978639	0.000610425	0.996914	0.930876
chr8	82519273	82519273	.	-0.387289	0.0491757	0.734629	0.963925
chr8	85646343	85646343	.	6.65821	0.0200539	1	0
chr8	85793150	85793150	.	6.65821	0.0200539	1	0
chr8	87821796	87821796	.	0.0901472	0.000823484	1	0.938821
chr8	93038584	93038584	.	-6.65821	0.000823484	0	1
chr8	94187399	94187399	CDH17	0.101108	0.000823484	0.993056	0.925166
chr8	98342556	98342556	.	-0.0924898	0.000823484	0.937282	1
chr8	98475682	98475682	STK3	0.0974962	0.0387452	0.992409	0.926905
chr8	101600452	101600452	GRHL2	0.149215	0.0200539	0.992409	0.893913
chr8	106913404	106913404	.	0.10166	0.0248922	0.992926	0.924687
chr8	115825499	115825499	.	-0.210434	0.046003	0.848516	0.983333
chr8	118044470	118044470	EXT1	0.0763016	0.0375256	0.992857	0.941196
chr8	128825583	128825583	.	6.65821	0.0200539	1	0
chr8	141850864	141850864	.	-0.182481	0.0391372	0.865939	0.984046
chr9	34864	34864	FAM138A,FAM138C,FAM138F	-6.65821	0.00845939	0	1
chr9	16889097	16889097	.	-0.0695476	0.00422201	0.935748	0.982456
chr9	19836028	19836028	.	-0.229568	0.0465928	0.831112	0.97619
chr9	39192773	39192773	CNTNAP3	6.65821	0.0200539	1	0
chr9	39766119	39766119	.	6.65821	0.0200539	1	0
chr9	40348605	40348605	GXYLT1P3	6.65821	7.65813e-05	1	0
chr9	40348611	40348611	GXYLT1P3	6.65821	0.000126305	1	0
chr9	40359454	40359454	.	6.65821	0.0200539	1	0
chr9	40467133	40467133	AQP7P3	3.19878	0.0296937	1	0.1
chr9	40620296	40620296	.	0.985786	0.00242131	1	0.5
chr9	40620325	40620325	.	0.985786	0.00242131	1	0.5
chr9	42102477	42102477	CNTNAP3B	-6.65821	0.000795948	0	1
chr9	42413864	42413864	.	-0.209135	0.0406435	0.863707	1
chr9	42710655	42710655	.	0.363591	0.0341541	1	0.775
chr9	43324755	43324755	.	-6.65821	0.00774144	0	1
chr9	43589372	43589372	.	6.65821	0.00242131	1	0
chr9	43607739	43607739	.	-0.276169	0.00660954	0.824038	1
chr9	43706203	43706203	.	6.65821	0.000126305	1	0
chr9	43931640	43931640	.	6.65821	0.00242131	1	0
chr9	43939811	43939811	.	6.65821	0.0200539	1	0
chr9	44107392	44107392	.	6.65821	0.0200539	1	0
chr9	44658721	44658721	.	0.985786	0.0130077	1	0.5
chr9	44894829	44894829	.	-6.65821	0.00845939	0	1
chr9	44987901	44987901	.	6.65821	0.000126305	1	0
chr9	45373946	45373946	.	6.65821	0.00242131	1	0
chr9	60870937	60870937	.	6.65821	0.0200539	1	0
chr9	61201312	61201312	.	6.65821	0.00242131	1	0
chr9	61287317	61287317	.	-6.65821	0.00774144	0	1
chr9	61287723	61287723	.	6.65821	0.000823484	1	0
chr9	61294283	61294283	.	6.65821	0.00774144	1	0
chr9	61858970	61858970	.	6.65821	0.0200539	1	0
chr9	61887322	61887322	.	6.65821	0.0200539	1	0
chr9	61991492	61991492	.	6.65821	7.65813e-05	1	0
chr9	61991549	61991549	.	6.65821	0.0200539	1	0
chr9	62287561	62287561	.	6.65821	0.000823484	1	0
chr9	62464474	62464474	LINC01189	6.65821	0.000823484	1	0
chr9	62510011	62510011	LINC01189	6.65821	0.00845939	1	0
chr9	62627639	62627639	.	6.65821	0.0200539	1	0
chr9	62709099	62709099	.	-6.65821	0.00774144	0	1
chr9	63386650	63386650	.	6.65821	0.0200539	1	0
chr9	64691577	64691577	LOC100996643,LOC101928195,LOC101929583,LOC105379443	6.65821	0.0200539	1	0
chr9	64711750	64711750	.	-6.65821	0.0200539	0	1
chr9	64711757	64711757	.	-6.65821	0.0200539	0	1
chr9	64758708	64758708	.	-6.65821	0.000610425	0	1
chr9	65142993	65142993	.	-6.65821	0.00845939	0	1
chr9	65179092	65179092	LOC101929583,LOC105379443	6.65821	0.00242131	1	0
chr9	65186393	65186393	.	6.65821	1.23942e-05	1	0
chr9	65883423	65883423	AQP7P3	6.65821	0.0200539	1	0
chr9	66215704	66215704	.	6.65821	0.0200539	1	0
chr9	67227312	67227312	CNTNAP3P2	-6.65821	0.00845939	0	1
chr9	67285893	67285893	CNTNAP3P2	-6.65821	0.00774144	0	1
chr9	67301735	67301735	.	-6.65821	0.00845939	0	1
chr9	67521781	67521781	.	6.65821	7.65813e-05	1	0
chr9	67574887	67574887	.	-0.985786	0.0130077	0.5	1
chr9	67574899	67574899	.	-0.985786	0.0130077	0.5	1
chr9	67645226	67645226	.	-6.65821	0.0200539	0	1
chr9	67645233	67645233	.	-6.65821	0.0200539	0	1
chr9	67694265	67694265	.	-6.65821	0.0200539	0	1
chr9	68327194	68327194	.	6.65821	0.00845939	1	0
chr9	72107617	72107617	.	0.263031	0.0343698	0.979293	0.814413
chr9	72495018	72495018	.	-0.0793332	0.00219546	0.935443	0.988889
chr9	73569156	73569156	.	0.139	3.13799e-15	1	0.90723
chr9	87184472	87184472	.	0.985786	0.00242131	1	0.5
chr9	87927251	87927251	LOC497256	-6.65821	0.000823484	0	1
chr9	88140487	88140487	.	-6.65821	0.00774144	0	1
chr9	91753500	91753500	ROR2	0.112045	0.0352345	0.990476	0.915716
chr9	94118590	94118590	.	6.65821	0.000823484	1	0
chr9	95701698	95701698	.	6.65821	0.0200539	1	0
chr9	96908843	96908843	.	6.65821	0.00242131	1	0
chr9	96917035	96917035	.	-6.65821	0.00242131	0	1
chr9	97854586	97854586	FOXE1	2.39407	0.00234846	0.27618	0.0444444
chr9	100110007	100110007	INVS	0.160074	0.0305171	0.986842	0.882153
chr9	110417387	110417387	SVEP1	0.435688	0.0200539	1	0.736735
chr9	113079032	113079032	.	6.65821	0.00774144	1	0
chr9	113106516	113106516	FAM225B	6.65821	0.0200539	1	0
chr9	120059216	120059216	.	-6.65821	0.00845939	0	1
chr9	127852938	127852938	ENG	0.134197	1.40317e-15	1	0.910289
chr9	128366599	128366599	MIR1268A	0.103172	6.04439e-16	1	0.930293
chr9	131304806	131304806	PLPP7	0.149459	0.0351245	0.987795	0.8896
chr9	134146455	134146455	WDR5	0.113518	0.0497905	0.98726	0.911799
chr9	134938663	134938663	.	-0.186989	0.0476675	0.86084	0.981352
chr9	137887615	137887615	CACNA1B,LOC100133077	-6.65821	0.00845939	0	1
chr9	138205532	138205532	.	6.65821	7.65813e-05	1	0
chr9	138225909	138225909	FAM157B	6.65821	0.00242131	1	0
chr1	465929	465929	.	-6.65821	0.00922825
chr1	2814343	2814343	.	-0.136793	0.0423507
chr1	2879426	2879426	.	-0.077639	0.00429645
chr1	7750646	7750646	CAMTA1	-0.166587	0.000865586
chr1	9162132	9162132	MIR34AHG	6.65821	0.00265423
chr1	13257430	13257430	PRAMEF5	-6.65821	0.00922825
chr1	16665589	16665589	.	6.65821	0.000865586
chr1	25317129	25317129	RHD,RSRP1	6.65821	0.000645092
chr1	26633501	26633501	.	-0.176496	0.00129909
chr1	39973198	39973198	.	0.22265	0.0300022
chr1	54627536	54627536	ACOT11	-0.29548	0.0415946
chr1	58949457	58949457	.	-0.168025	0.0319422
chr1	62799939	62799939	ATG4C	0.100715	0.000865586
chr1	65549303	65549303	LEPR	-0.396064	0.00265423
chr1	66592143	66592143	SGIP1	-0.15606	0.0220771
chr1	86288320	86288320	.	-0.130572	0.000865586
chr1	87526060	87526060	.	0.116794	0.000865586
chr1	92149283	92149283	BTBD8	-0.166373	0.000865586
chr1	104687071	104687071	.	0.144818	0.000865586
chr1	108231605	108231605	NBPF4	6.65821	0.000645092
chr1	108462665	108462665	NBPF6	6.65821	0.00922825
chr1	119076262	119076262	WARS2	0.114799	0.036828
chr1	120700981	120700981	.	-6.65821	0.02204
chr1	120700986	120700986	.	-6.65821	0.02204
chr1	121170602	121170602	FAM72B	6.65821	0.000645092
chr1	121247879	121247879	SRGAP2C	6.65821	0.000147141
chr1	121300808	121300808	SRGAP2C	3.85334	0.02204
chr1	121300813	121300813	SRGAP2C	3.31159	0.0351506
chr1	121686907	121686907	.	-6.65821	0.00922825
chr1	121777517	121777517	.	0.985786	0.0148248
chr1	121783633	121783633	.	-6.65821	0.00922825
chr1	121849061	121849061	.	6.65821	0.000645092
chr1	121912522	121912522	.	6.65821	0.02204
chr1	122032508	122032508	.	0.471985	0.00131858
chr1	122049619	122049619	.	6.65821	0.02204
chr1	122120004	122120004	.	6.65821	0.02204
chr1	122160933	122160933	.	6.65821	0.00265423
chr1	122161006	122161006	.	6.65821	0.02204
chr1	122216580	122216580	.	-6.65821	0.000865586
chr1	122272179	122272179	.	-6.65821	0.02204
chr1	122450924	122450924	.	-6.65821	0.02204
chr1	122450933	122450933	.	-6.65821	0.02204
chr1	122557295	122557295	.	-0.692244	0.0369606
chr1	123664876	123664876	.	0.985786	0.0148248
chr1	124124841	124124841	.	-0.06768	0.000865586
chr1	124791958	124791958	.	6.65821	0.02204
chr1	124851699	124851699	.	-0.297312	0.00970388
chr1	143322571	143322571	.	6.65821	0.00265423
chr1	143353978	143353978	.	-6.65821	5.74325e-06
chr1	143365032	143365032	.	-0.281518	0.00107347
chr1	144153075	144153075	.	6.65821	0.00265423
chr1	144214245	144214245	.	6.65821	0.00265423
chr1	144372738	144372738	.	6.65821	0.000147141
chr1	144386675	144386675	.	6.65821	0.00922825
chr1	144576000	144576000	.	6.65821	9.07516e-05
chr1	144647315	144647315	SRGAP2-AS1	6.65821	0.00922825
chr1	144715434	144715434	SRGAP2-AS1	6.65821	0.02204
chr1	144778848	144778848	SRGAP2-AS1	0.767441	0.0294556
chr1	144813769	144813769	SRGAP2-AS1	6.65821	0.000865586
chr1	145167034	145167034	LINC01145,LOC644634	6.65821	0.00922825
chr1	146285855	146285855	.	6.65821	0.02204
chr1	146516933	146516933	HYDIN2	6.65821	0.00265423
chr1	148682260	148682260	.	6.65821	0.02204
chr1	155166755	155166755	.	4.89914	0.00265423
chr1	157031529	157031529	ARHGEF11	-0.246286	0.0266822
chr1	160095000	160095000	IGSF8	0.101689	0.000888665
chr1	161592233	161592233	FCGR2C	6.65821	0.00265423
chr1	162236491	162236491	NOS1AP	-0.0878143	0.000865586
chr1	168796859	168796859	.	-0.0655176	0.00392183
chr1	170419224	170419224	.	6.65821	2.17571e-07
chr1	182741470	182741470	.	6.65821	0.00922825
chr1	184931391	184931391	NIBAN1	0.0931986	0.000865586
chr1	195484286	195484286	.	-0.201489	0.036667
chr1	197230336	197230336	CRB1	0.103079	0.000645092
chr1	197918773	197918773	LHX9	3.7827	6.36916e-16
chr1	200285506	200285506	.	6.62205	0.0353555
chr1	202270696	202270696	LGR6	-0.189259	0.0322508
chr1	203315812	203315812	.	-0.164031	4.69002e-15
chr1	207635549	207635549	CR1	2.50439	0.042377
chr1	210444454	210444454	HHAT	-0.439502	0.000911933
chr1	226613634	226613634	.	-0.0800345	0.00220486
chr1	227275835	227275835	CDC42BPA	0.183797	0.0339311
chr1	228609823	228609823	.	6.65821	9.07516e-05
chr1	230131762	230131762	GALNT2	-0.158742	0.0449234
chr1	233129092	233129092	PCNX2	0.288516	0.000865586
chr1	236387340	236387340	.	6.65821	0.02204
chr1	238919901	238919901	.	6.65821	9.07516e-05
chr1	240453715	240453715	FMN2	0.479724	0.0143592
chr1	241908788	241908788	.	6.65821	0.00922825
chr1	243469729	243469729	SDCCAG8	0.0883699	0.000865586
chr1	248435667	248435667	.	-0.682204	0.000713331
chr10	7355578	7355578	SFMBT2	0.0932436	0.000865586
chr10	9988308	9988308	.	-0.126233	0.000865586
chr10	12660823	12660823	CAMK1D	0.0935279	0.0441465
chr10	38881849	38881849	.	-0.315819	0.000481946
chr10	39790784	39790784	.	6.65821	0.00922825
chr10	39848841	39848841	.	6.65821	0.00265423
chr10	40053746	40053746	.	6.65821	0.000865586
chr10	41026809	41026809	.	6.65821	0.02204
chr10	41085181	41085181	.	-6.65821	0.02204
chr10	41369217	41369217	.	-0.669527	0.0431807
chr10	42241874	42241874	.	6.65821	9.07516e-05
chr10	47754641	47754641	LOC102724488,LOC102724593,SYT15	6.65821	0.02204
chr10	47874878	47874878	.	6.65821	0.02204
chr10	47910143	47910143	.	6.65821	1.76208e-05
chr10	47918784	47918784	NPY4R,NPY4R2	-6.65821	1.76208e-05
chr10	47993664	47993664	.	-0.252905	0.0396234
chr10	48140001	48140001	.	-6.65821	0.02204
chr10	53381537	53381537	.	0.110046	4.33326e-05
chr10	57943731	57943731	.	0.208305	0.000865586
chr10	59398802	59398802	.	0.135223	0.0247297
chr10	62285815	62285815	.	0.128659	0.0372387
chr10	62928922	62928922	.	0.318361	0.000464624
chr10	66146803	66146803	CTNNA3	0.130243	0.0436261
chr10	67933390	67933390	HERC4	-0.143683	0.000900826
chr10	74165052	74165052	ADK	-0.112771	0.000865586
chr10	76846276	76846276	.	0.0754427	0.000865586
chr10	77041399	77041399	KCNMA1	-6.65821	0.02204
chr10	78045872	78045872	RPS24	-0.144701	0.000866803
chr10	78375004	78375004	.	-0.190533	0.0344006
chr10	80335700	80335700	.	-0.13264	3.04863e-05
chr10	80506024	80506024	TSPAN14	0.0587137	0.0462625
chr10	92375479	92375479	.	6.65821	0.000645092
chr10	93611201	93611201	.	-0.283303	0.00128034
chr10	96941889	96941889	LCOR	0.577838	0.00437602
chr10	99728313	99728313	COX15	-0.0916201	0.000865586
chr10	100277817	100277817	BLOC1S2	6.65821	0.00922825
chr10	112759547	112759547	VTI1A	0.126534	0.000865586
chr10	113976984	113976984	.	-0.11194	0.0315097
chr10	114428136	114428136	.	-0.173542	0.000865586
chr10	121154506	121154506	.	0.0948254	0.0289865
chr10	129260193	129260193	.	0.124958	0.0243015
chr11	385250	385250	.	0.577838	0.02204
chr11	2332604	2332604	CD81-AS1	6.65821	0.02204
chr11	17505145	17505145	USH1C	-0.142066	0.0479357
chr11	38230088	38230088	.	-0.176781	0.00689461
chr11	47097846	47097846	C11orf49	0.49163	0.0328846
chr11	48898845	48898845	.	6.65821	0.000865586
chr11	50133119	50133119	.	-3.75489	0.0370841
chr11	51408205	51408205	.	6.65821	0.02204
chr11	52198891	52198891	.	0.836615	0.00265423
chr11	53197558	53197558	.	0.985786	0.0148248
chr11	53311855	53311855	.	-6.65821	0.02204
chr11	53311993	53311993	.	6.65821	0.02204
chr11	53752907	53752907	.	6.65821	0.02204
chr11	53966926	53966926	.	-6.65821	0.00922825
chr11	54038155	54038155	.	6.65821	0.00922825
chr11	54038164	54038164	.	6.65821	0.00922825
chr11	54326555	54326555	.	6.65821	0.000865586
chr11	58440311	58440311	OR5B12	0.196738	0.000814229
chr11	60622707	60622707	LINC00301	6.65821	0.02204
chr11	71265326	71265326	.	0.0745952	0.000744677
chr11	72150864	72150864	.	-6.65821	0.02204
chr11	89824781	89824781	LOC642414	6.65821	0.000865586
chr11	89880372	89880372	.	-6.65821	0.02204
chr11	89904613	89904613	.	6.65821	0.00265423
chr11	89971465	89971465	TRIM64	-0.378988	0.0228591
chr11	89980122	89980122	.	-4.55459	0.0369606
chr11	102291309	102291309	.	-0.0989752	0.000865586
chr11	108007613	108007613	.	0.106446	0.0443116
chr11	108565631	108565631	EXPH5	-0.0856857	0.00107347
chr11	110124249	110124249	ZC3H12C	-0.144602	0.000799118
chr11	113783384	113783384	.	-0.0926064	0.000865586
chr11	119599170	119599170	.	-0.25352	0.000865586
chr12	1661833	1661833	.	-6.65821	1.15059e-06
chr12	5912002	5912002	ANO2	-0.112736	0.0456762
chr12	6928592	6928592	ATN1	-6.65821	8.5354e-08
chr12	7045765	7045765	.	0.0929882	0.00129999
chr12	7775446	7775446	.	-0.14739	0.043444
chr12	11168773	11168773	PRH1,PRH1-PRR4,PRH1-TAS2R14	0.107077	0.00185353
chr12	12978359	12978359	GPRC5D-AS1,HEBP1	-0.107368	0.000865586
chr12	15776362	15776362	EPS8	-0.174056	0.000865586
chr12	22485978	22485978	C2CD5	-0.133346	0.0415239
chr12	24659578	24659578	.	0.186769	0.000865586
chr12	30680204	30680204	IPO8	-0.258609	0.000865586
chr12	32896942	32896942	.	-6.65821	0.02204
chr12	34774079	34774079	.	6.65821	0.02204
chr12	34876238	34876238	.	6.65821	0.000865586
chr12	35373047	35373047	.	0.985786	0.02204
chr12	35585083	35585083	.	0.665026	3.04863e-05
chr12	35637600	35637600	.	0.985786	0.00272712
chr12	35836265	35836265	.	0.985786	0.0148248
chr12	35860709	35860709	.	-6.65821	0.02204
chr12	36119413	36119413	.	0.577838	8.78513e-05
chr12	36122182	36122182	.	6.65821	9.07516e-05
chr12	36238707	36238707	.	-6.65821	0.000147141
chr12	37163650	37163650	.	-6.65821	0.000865586
chr12	37183161	37183161	.	-0.373521	6.12415e-05
chr12	47840084	47840084	.	0.128927	0.0369864
chr12	51976528	51976528	ACVR1B	-0.181123	0.0241277
chr12	55479180	55479180	.	-6.65821	0.00922825
chr12	60070065	60070065	.	-0.111017	0.0481183
chr12	69868364	69868364	MYRFL	-0.0972092	0.00624164
chr12	76564557	76564557	.	0.145133	0.045266
chr12	94735194	94735194	.	-0.0827018	0.000865586
chr12	111046484	111046484	CUX2	-0.117764	0.000832248
chr12	113355911	113355911	.	-0.122058	6.97187e-14
chr12	116699241	116699241	.	0.106815	0.000865586
chr12	117968676	117968676	KSR2	3.72023	0.000865586
chr12	118735832	118735832	.	-0.141519	0.0052873
chr12	125888119	125888119	.	0.122094	0.00265423
chr12	126302916	126302916	.	6.65821	0.02204
chr13	17449024	17449024	.	6.65821	0.02204
chr13	18041343	18041343	.	-0.0848333	0.000900826
chr13	18232465	18232465	.	0.251457	0.000865586
chr13	34840125	34840125	.	0.985786	0.02204
chr13	42453412	42453412	LINC02341	-0.113926	0.0487376
chr13	47033821	47033821	.	0.420331	0.0161905
chr13	49378525	49378525	CAB39L	6.65821	0.02204
chr13	52064165	52064165	NEK5	6.65821	0.02204
chr13	52575314	52575314	TPTE2P3	-6.65821	0.00922825
chr13	72752787	72752787	BORA,DIS3	0.127023	0.000865586
chr13	78308810	78308810	OBI1-AS1	0.281334	0.0415574
chr13	81932775	81932775	.	1.24317	0.015403
chr13	95690989	95690989	DNAJC3	6.65821	0.02204
chr13	101188199	101188199	NALCN	-0.153157	0.0458802
chr13	113512832	113512832	TMCO3	0.218547	0.000865586
chr13	113543196	113543196	TMCO3	6.65821	0.02204
chr14	16048564	16048564	.	-6.65821	0.00820257
chr14	16057184	16057184	.	6.65821	0.02204
chr14	18520159	18520159	.	6.65821	0.00922825
chr14	19016116	19016116	.	-0.386748	0.0339311
chr14	19641101	19641101	.	6.65821	0.000147141
chr14	20506127	20506127	RNASE10	6.65821	0.02204
chr14	34542539	34542539	.	0.985786	0.0148248
chr14	34542680	34542680	.	0.985786	0.0148248
chr14	34560535	34560535	.	6.65821	9.07516e-05
chr14	34560567	34560567	.	6.65821	0.00265423
chr14	50896753	50896753	ABHD12B	-0.340067	0.0457458
chr14	61340450	61340450	PRKCH	-0.411068	0.0462309
chr14	63165765	63165765	.	6.65821	0.02204
chr14	64430877	64430877	MTHFD1	-0.145885	0.00139446
chr14	64483875	64483875	ZBTB25	0.463676	0.00140885
chr14	69962661	69962661	SMOC1	0.188545	0.000865586
chr14	77081649	77081649	.	-0.260353	0.0328846
chr14	91166402	91166402	DGLUCY	0.113559	0.000865586
chr14	93984090	93984090	.	-0.0791223	0.00394342
chr14	96394876	96394876	AK7	-0.133146	0.0302523
chr14	101135778	101135778	.	-0.242714	0.000645092
chr14	105112444	105112444	.	6.65821	0.00265423
chr14	105112454	105112454	.	6.65821	0.00265423
chr14	105236559	105236559	BRF1	6.65821	0.00265423
chr14	105239128	105239128	BRF1	6.65821	0.02204
chr15	17391120	17391120	.	6.65821	0.02204
chr15	17483366	17483366	.	6.65821	0.00820257
chr15	17623960	17623960	.	6.65821	0.00820257
chr15	17624335	17624335	.	6.65821	0.00820257
chr15	17803110	17803110	.	-6.65821	0.00922825
chr15	17867506	17867506	.	6.65821	0.000147141
chr15	17899163	17899163	.	-6.50779	0.0299785
chr15	17926318	17926318	.	6.65821	0.00820257
chr15	17978973	17978973	.	6.65821	0.000645092
chr15	18089226	18089226	.	-6.65821	0.00922825
chr15	18151267	18151267	.	-6.65821	0.02204
chr15	18712160	18712160	.	-0.610698	0.0205004
chr15	18843245	18843245	.	6.65821	0.00265423
chr15	18843254	18843254	.	6.65821	0.00265423
chr15	18874126	18874126	.	-6.65821	0.00820257
chr15	18973480	18973480	.	0.613817	0.0110521
chr15	18973492	18973492	.	0.985786	0.02204
chr15	18992366	18992366	.	6.65821	0.00265423
chr15	19060848	19060848	.	0.985786	0.0148248
chr15	19178780	19178780	.	6.65821	0.00922825
chr15	19207963	19207963	.	0.577838	0.02204
chr15	19277828	19277828	.	-6.65821	0.00922825
chr15	19294481	19294481	.	2.26589	0.0369358
chr15	19556697	19556697	.	-6.65821	0.000865586
chr15	19652635	19652635	.	6.65821	0.00922825
chr15	19723864	19723864	.	-6.65821	0.00922825
chr15	20116553	20116553	.	6.65821	0.000147141
chr15	21167366	21167366	.	6.65821	0.00922825
chr15	21312071	21312071	.	0.613817	0.000714472
chr15	21312180	21312180	.	0.577838	0.02204
chr15	21452646	21452646	.	-6.65821	0.000865586
chr15	30179570	30179570	.	-6.65821	9.07516e-05
chr15	30508308	30508308	.	-6.65821	0.02204
chr15	32281296	32281296	LOC100288637	6.65821	0.02204
chr15	32373406	32373406	LOC100288637	6.65821	0.000865586
chr15	35009415	35009415	.	0.133825	0.000865586
chr15	40617736	40617736	KNL1	0.11131	4.0091e-15
chr15	41238567	41238567	CHP1	-0.109856	0.000865586
chr15	41382490	41382490	.	6.65821	0.000865586
chr15	43024006	43024006	UBR1	0.105343	0.000884998
chr15	56110111	56110111	RFX7	-6.65821	0.02204
chr15	57427713	57427713	CGNL1	0.417966	0.0270406
chr15	59285095	59285095	MYO1E	-0.10609	0.00179198
chr15	66450364	66450364	MAP2K1	6.65821	0.00922825
chr15	74744840	74744840	.	0.100662	0.0302092
chr15	80033948	80033948	.	0.129572	0.0360865
chr15	82519410	82519410	.	6.65821	0.000645092
chr15	83198850	83198850	HDGFL3	-0.206225	0.038028
chr15	84368368	84368368	.	-6.65821	0.000865586
chr15	84444687	84444687	GOLGA6L4,LOC102724135	-6.65821	0.00922825
chr15	89975623	89975623	.	-0.0988224	0.000865586
chr15	99808184	99808184	LOC400464	0.335425	0.0062967
chr15	101969165	101969165	WASH3P	6.65821	0.00922825
chr16	275931	275931	RGS11	-6.65821	0.02204
chr16	1865418	1865418	MEIOB	0.305958	0.0168772
chr16	2568873	2568873	PDPK1	-6.65821	0.00922825
chr16	2653527	2653527	.	6.65821	0.000645092
chr16	2693507	2693507	KCTD5	-0.114253	0.000865586
chr16	8857534	8857534	CARHSP1,LOC100130283	-6.65821	9.07516e-05
chr16	14690107	14690107	PLA2G10	6.65821	0.02204
chr16	14933476	14933476	PKD1P3-NPIPA1	6.65821	0.000645092
chr16	15241280	15241280	.	6.65821	0.02204
chr16	15241383	15241383	.	6.65821	7.55123e-06
chr16	16296143	16296143	.	6.65821	0.00820257
chr16	16672957	16672957	.	-6.65821	0.02204
chr16	18267140	18267140	.	6.65821	0.000147141
chr16	18337127	18337127	PKD1P4-NPIPA8	6.65821	0.000865586
chr16	18355138	18355138	.	6.65821	0.00922825
chr16	22124829	22124829	VWA3A	0.127866	0.000713788
chr16	22492967	22492967	.	6.65821	0.000865586
chr16	28429167	28429167	.	6.65821	0.02204
chr16	28758624	28758624	NPIPB9	6.65821	0.00820257
chr16	29194473	29194473	.	-0.185042	0.00524095
chr16	29455607	29455607	SLX1A,SLX1A-SULT1A3,SLX1B,SLX1B-SULT1A4	-6.65821	0.00820257
chr16	32024140	32024140	.	-0.370902	0.0112959
chr16	32095000	32095000	.	-6.65821	0.00922825
chr16	32726777	32726777	.	6.65821	0.000865586
chr16	32726784	32726784	.	6.65821	0.00820257
chr16	32726804	32726804	.	6.65821	0.00922825
chr16	32925028	32925028	.	6.65821	0.000865586
chr16	33096848	33096848	.	6.65821	0.02204
chr16	33143692	33143692	.	3.52686	0.02204
chr16	33786148	33786148	.	6.65821	0.02204
chr16	33813584	33813584	.	6.65821	0.02204
chr16	33977345	33977345	.	6.65821	0.02204
chr16	34415695	34415695	.	-6.65821	0.00922825
chr16	34454489	34454489	.	6.65821	0.02204
chr16	34456775	34456775	.	0.985786	0.0148248
chr16	34496177	34496177	.	6.65821	0.00922825
chr16	34847656	34847656	.	0.767441	0.0294556
chr16	34999379	34999379	.	6.65821	0.02204
chr16	35022137	35022137	.	6.65821	0.00265423
chr16	35022708	35022708	.	6.65821	0.00265423
chr16	36519400	36519400	.	6.65821	0.000865586
chr16	36554839	36554839	.	-6.65821	0.000865586
chr16	36633336	36633336	.	6.65821	0.02204
chr16	36713476	36713476	.	6.65821	0.02204
chr16	36766737	36766737	.	6.65821	0.00820257
chr16	36767538	36767538	.	-6.65821	0.02204
chr16	36961937	36961937	.	6.65821	0.00265423
chr16	36980937	36980937	.	-6.65821	0.02204
chr16	37002156	37002156	.	6.65821	0.00922825
chr16	37052137	37052137	.	-6.65821	0.000865586
chr16	37091205	37091205	.	6.65821	0.00922825
chr16	37148441	37148441	.	-6.65821	0.00922825
chr16	37154775	37154775	.	6.65821	0.02204
chr16	37192908	37192908	.	-6.65821	0.00922825
chr16	37194819	37194819	.	-6.65821	0.00922825
chr16	37195188	37195188	.	6.65821	0.02204
chr16	37269449	37269449	.	6.65821	0.000147141
chr16	37290915	37290915	.	6.65821	0.000865586
chr16	37352772	37352772	.	-6.65821	0.00922825
chr16	37412998	37412998	.	6.65821	0.02204
chr16	37470982	37470982	.	6.65821	0.00820257
chr16	37488089	37488089	.	-6.65821	0.02204
chr16	37573703	37573703	.	-6.65821	0.00820257
chr16	37629390	37629390	.	6.65821	0.02204
chr16	37989936	37989936	.	6.65821	0.000147141
chr16	38034376	38034376	.	-6.65821	0.000865586
chr16	38081045	38081045	.	6.65821	0.00922825
chr16	38225094	38225094	.	-6.65821	0.000865586
chr16	46653279	46653279	.	6.65821	0.00922825
chr16	68588558	68588558	.	6.65821	0.00922825
chr16	70715047	70715047	VAC14	-0.120683	0.0339311
chr16	76405700	76405700	CNTNAP4	-0.235661	0.00121487
chr16	76509523	76509523	CNTNAP4	-0.189979	0.000865586
chr16	81875524	81875524	PLCG2	0.0898164	0.000865586
chr16	87035707	87035707	.	0.179664	0.000460478
chr16	88446226	88446226	.	0.0931323	0.037517
chr16	89345909	89345909	ANKRD11	-0.091749	0.000932002
chr16	89717784	89717784	VPS9D1,VPS9D1-AS1	0.155571	0.000865586
chr16	89884981	89884981	TCF25	6.65821	0.00820257
chr17	231834	231834	RPH3AL	-0.117238	0.0384523
chr17	273435	273435	RPH3AL	0.767441	4.18233e-05
chr17	1308600	1308600	.	6.65821	0.00922825
chr17	2749720	2749720	.	-6.65821	0.02204
chr17	11974232	11974232	.	-0.0957574	0.0462625
chr17	14541910	14541910	.	-6.65821	9.07516e-05
chr17	19119380	19119380	.	6.65821	0.02204
chr17	19123961	19123961	.	6.65821	0.000645092
chr17	20507584	20507584	.	6.65821	0.000645092
chr17	20559628	20559628	.	-0.0843527	0.000865586
chr17	22395299	22395299	.	-0.210601	0.00897669
chr17	23129423	23129423	.	6.65821	0.00922825
chr17	23267218	23267218	.	6.65821	0.02204
chr17	23267282	23267282	.	6.65821	0.02204
chr17	23267291	23267291	.	6.65821	0.02204
chr17	23293578	23293578	.	-6.65821	0.02204
chr17	23501089	23501089	.	-6.65821	0.00922825
chr17	23584345	23584345	.	-6.65821	0.000865586
chr17	23652171	23652171	.	-6.65821	0.00820257
chr17	23852008	23852008	.	6.65821	0.00922825
chr17	23867394	23867394	.	-6.65821	0.00820257
chr17	23953630	23953630	.	6.65821	0.000865586
chr17	24017327	24017327	.	6.65821	0.02204
chr17	24034728	24034728	.	6.65821	0.000865586
chr17	24184750	24184750	.	6.65821	0.02204
chr17	24554455	24554455	.	-6.65821	0.02204
chr17	24774574	24774574	.	6.65821	0.000865586
chr17	24863404	24863404	.	-6.65821	0.00922825
chr17	24874175	24874175	.	6.65821	0.00922825
chr17	24889081	24889081	.	6.65821	0.00265423
chr17	24902309	24902309	.	6.65821	0.02204
chr17	25029333	25029333	.	6.65821	0.02204
chr17	25069413	25069413	.	6.65821	0.02204
chr17	25120531	25120531	.	6.65821	0.02204
chr17	25206291	25206291	.	6.65821	0.00922825
chr17	25315709	25315709	.	6.65821	0.00265423
chr17	25588052	25588052	.	-0.872487	0.000865586
chr17	25638444	25638444	.	6.65821	0.000645092
chr17	25687869	25687869	.	-6.65821	0.00922825
chr17	25723649	25723649	.	-0.985786	0.02204
chr17	25781160	25781160	.	6.65821	0.000865586
chr17	25837315	25837315	.	6.65821	0.02204
chr17	26196863	26196863	.	6.65821	0.00820257
chr17	26395327	26395327	.	6.65821	0.02204
chr17	26395331	26395331	.	6.65821	0.02204
chr17	26395336	26395336	.	6.65821	0.02204
chr17	26423492	26423492	.	6.65821	0.02204
chr17	26426004	26426004	.	6.65821	0.00265423
chr17	26438722	26438722	.	6.65821	0.00922825
chr17	26845970	26845970	.	-0.363591	0.00722533
chr17	27317291	27317291	.	0.156424	0.048059
chr17	27794422	27794422	NOS2	0.136653	0.0386771
chr17	36127219	36127219	.	-0.153953	0.000645092
chr17	41857228	41857228	KLHL11	0.104122	0.0391741
chr17	43294789	43294789	.	6.65821	0.000645092
chr17	46377726	46377726	NSFP1	0.18383	0.0371438
chr17	46384111	46384111	NSFP1	0.152019	0.0105538
chr17	46527158	46527158	ARL17A,ARL17B,LRRC37A2	0.363591	0.00722533
chr17	46976592	46976592	.	-0.165779	0.0451884
chr17	47916995	47916995	SP2,SP2-AS1	0.126877	0.000865586
chr17	58431546	58431546	HSF5	-0.135539	0.000960079
chr17	58672633	58672633	TEX14	-0.0926986	0.000832248
chr17	60125605	60125605	.	-6.65821	0.000865586
chr17	61401049	61401049	TBX2	3.62191	0.000865586
chr17	62092216	62092216	.	-0.150173	0.0372947
chr17	64894293	64894293	LRRC37A3	-6.65821	0.02204
chr17	70549636	70549636	.	6.65821	0.000147141
chr17	76537477	76537477	CYGB,PRCD	2.43482	0.0370841
chr17	82041051	82041051	.	-0.19395	0.040869
chr17	83135005	83135005	.	0.985786	0.0148248
chr18	4290240	4290240	DLGAP1,DLGAP1-AS5	0.147429	0.0468995
chr18	7795106	7795106	PTPRM	-0.120097	0.02204
chr18	10857133	10857133	PIEZO2	-0.182156	0.0305406
chr18	11752090	11752090	GNAL	2.97839	0.000865586
chr18	14218866	14218866	ANKRD20A5P	0.157587	0.0457458
chr18	15967425	15967425	.	6.65821	0.000865586
chr18	15970381	15970381	.	-6.65821	0.000865586
chr18	16125243	16125243	.	6.65821	0.000865586
chr18	16376908	16376908	.	6.65821	0.000645092
chr18	16507104	16507104	.	-6.65821	0.00265423
chr18	16561386	16561386	.	-6.65821	0.02204
chr18	16639597	16639597	.	6.65821	0.00265423
chr18	16682721	16682721	.	0.985786	0.00325546
chr18	16811096	16811096	.	-6.65821	0.000865586
chr18	17220503	17220503	.	6.65821	0.000865586
chr18	17349015	17349015	.	1.64698	0.030878
chr18	17508111	17508111	.	6.65821	0.02204
chr18	17771529	17771529	.	-6.65821	0.000147141
chr18	18130081	18130081	.	6.65821	0.00265423
chr18	18169786	18169786	.	-6.65821	0.000865586
chr18	18305968	18305968	.	6.65821	0.02204
chr18	18372491	18372491	.	-6.65821	0.00820257
chr18	18397437	18397437	.	6.65821	0.00922825
chr18	18838259	18838259	.	6.65821	7.55123e-06
chr18	18857285	18857285	.	6.65821	0.02204
chr18	18998974	18998974	.	0.985786	0.0148248
chr18	19024809	19024809	.	6.65821	0.000865586
chr18	19045312	19045312	.	6.65821	0.00265423
chr18	19070437	19070437	.	6.65821	0.000865586
chr18	19184073	19184073	.	6.65821	0.00820257
chr18	19211637	19211637	.	-6.65821	0.00922825
chr18	19296624	19296624	.	6.65821	0.000865586
chr18	19355512	19355512	.	6.65821	0.00265423
chr18	19359435	19359435	.	6.65821	0.02204
chr18	19472189	19472189	.	6.65821	0.02204
chr18	19564976	19564976	.	6.65821	0.02204
chr18	19873652	19873652	.	6.65821	0.000645092
chr18	20169751	20169751	.	6.65821	0.000865586
chr18	20251285	20251285	.	6.65821	0.000645092
chr18	20402165	20402165	.	6.65821	0.02204
chr18	20525634	20525634	.	0.985786	3.38215e-05
chr18	20633243	20633243	.	-6.65821	0.02204
chr18	20664924	20664924	.	6.65821	0.00265423
chr18	31485187	31485187	.	-0.111509	0.000984499
chr18	32015225	32015225	.	0.150048	0.0286348
chr18	37008640	37008640	KIAA1328	-0.155537	0.000865586
chr18	50604581	50604581	MAPK4	-0.134397	0.0025966
chr18	76516380	76516380	.	-0.149696	0.00670046
chr18	76653694	76653694	.	0.160298	0.00922825
chr18	79704204	79704204	CTDP1	-0.0927314	0.000865586
chr19	60481	60481	.	6.65821	0.00922825
chr19	5294169	5294169	PTPRS	2.79083	0.000865586
chr19	5740141	5740141	CATSPERD	0.153096	0.000865586
chr19	5833661	5833661	FUT6	0.115021	0.000865586
chr19	7235746	7235746	INSR	-0.201052	0.000676398
chr19	8251283	8251283	CERS4	0.168587	0.0276652
chr19	14605070	14605070	CLEC17A	-0.144883	0.0443116
chr19	15933241	15933241	CYP4F11	6.65821	0.000865586
chr19	18611166	18611166	.	-3.07558	0.000865586
chr19	18747949	18747949	CRTC1	-0.0721808	0.000950543
chr19	21722073	21722073	.	6.65821	0.000865586
chr19	21722077	21722077	.	6.65821	0.000865586
chr19	21722085	21722085	.	6.65821	0.000147141
chr19	21755441	21755441	ZNF100	-0.17778	2.2507e-12
chr19	22647079	22647079	ZNF492	-0.246809	0.00265423
chr19	33446175	33446175	PEPD	-0.120974	0.000865586
chr19	35269334	35269334	USF2	-6.65821	0.02204
chr19	35269340	35269340	USF2	-6.65821	0.02204
chr19	35269352	35269352	USF2	-6.65821	0.000865586
chr19	37297415	37297415	.	-6.65821	0.00820257
chr19	37872962	37872962	.	0.223208	0.000865586
chr19	40027450	40027450	.	0.16914	0.000865586
chr19	40957955	40957955	.	-0.147667	0.001575
chr19	43511564	43511564	ETHE1	0.123718	0.000865586
chr19	47919186	47919186	.	6.65821	0.00265423
chr19	50096471	50096471	.	6.65821	0.02204
chr19	50096496	50096496	.	6.65821	0.00265423
chr19	50112958	50112958	.	6.65821	0.000865586
chr19	51241611	51241611	.	-0.106216	0.00189725
chr19	52639808	52639808	ZNF83	0.135958	0.000865586
chr19	56962028	56962028	.	-6.65821	0.000865586
chr2	8274244	8274244	LINC00299	0.071891	0.00231565
chr2	8546378	8546378	.	-0.141167	0.0415255
chr2	11157550	11157550	SLC66A3	0.172914	0.0474258
chr2	14848391	14848391	.	-0.110573	0.00922825
chr2	24136384	24136384	FAM228B	-0.13306	0.000865586
chr2	26473265	26473265	OTOF	0.166551	5.546e-15
chr2	31220743	31220743	CAPN14	-0.0935776	0.00194412
chr2	55103763	55103763	RTN4	0.149469	0.000882569
chr2	55427346	55427346	.	0.0811424	0.0443116
chr2	62156050	62156050	.	0.0798462	0.0446711
chr2	64511679	64511679	.	6.65821	0.00265423
chr2	67195912	67195912	LINC01828,LINC01829	-0.101675	0.000865586
chr2	76165499	76165499	.	-0.385621	0.0328846
chr2	77323989	77323989	LRRTM4	0.171957	0.0474722
chr2	86328656	86328656	REEP1	-0.108524	0.000865586
chr2	86995515	86995515	RGPD1,RGPD2	6.65821	9.07516e-05
chr2	87787506	87787506	RGPD1,RGPD2	6.65821	1.15059e-06
chr2	87789352	87789352	RGPD1,RGPD2	6.65821	0.02204
chr2	87804850	87804850	RGPD1,RGPD2	6.65821	0.00265423
chr2	88335288	88335288	.	0.0734236	0.0383694
chr2	89586812	89586812	.	-6.65821	0.02204
chr2	91403623	91403623	.	6.65821	0.00922825
chr2	91655389	91655389	LSP1P4	-0.143709	0.00113814
chr2	92019858	92019858	.	6.65821	0.02204
chr2	92029633	92029633	.	6.65821	0.000147141
chr2	92039217	92039217	.	6.65821	0.00265423
chr2	92227016	92227016	.	-0.152364	0.00526828
chr2	92623425	92623425	.	6.65821	9.07516e-05
chr2	93252911	93252911	.	6.65821	0.02204
chr2	93512917	93512917	.	-6.65821	7.55123e-06
chr2	93742181	93742181	.	-6.65821	7.55123e-06
chr2	93966170	93966170	.	6.65821	0.00265423
chr2	95429932	95429932	.	6.65821	0.00265423
chr2	95620845	95620845	.	6.65821	0.02204
chr2	96034909	96034909	GPAT2	-6.65821	0.02204
chr2	98892488	98892488	CRACDL	-0.191534	0.0456272
chr2	103696182	103696182	.	0.345273	0.0266822
chr2	104133398	104133398	.	0.0625739	0.000865586
chr2	107448746	107448746	.	-0.184014	0.0256119
chr2	109917259	109917259	LIMS3,LIMS3-LOC440895,LIMS4	6.65821	0.00922825
chr2	110070451	110070451	.	0.985786	0.000865586
chr2	110572450	110572450	RGPD5,RGPD6,RGPD8	6.65821	0.02204
chr2	111446026	111446026	.	6.65821	0.00820257
chr2	112607182	112607182	.	-6.65821	0.02204
chr2	118876367	118876367	.	-0.24687	0.0451949
chr2	127788285	127788285	WDR33	6.65821	1.76208e-05
chr2	128418413	128418413	.	6.65821	0.02204
chr2	129863250	129863250	LINC02572	-0.073887	0.000865586
chr2	130503829	130503829	POTEI	6.65821	0.02204
chr2	130505512	130505512	POTEI	-6.65821	0.000865586
chr2	130606508	130606508	.	-0.767441	0.0053683
chr2	131258099	131258099	POTEE	6.65821	0.02204
chr2	136486489	136486489	.	-0.159454	0.00114992
chr2	138985032	138985032	.	-6.65821	0.00265423
chr2	156369489	156369489	.	6.65821	0.00265423
chr2	161477283	161477283	.	0.143246	0.00199156
chr2	163244022	163244022	.	-0.155909	0.0480789
chr2	169786655	169786655	.	-6.65821	0.000865586
chr2	169787135	169787135	.	6.65821	0.02204
chr2	172006384	172006384	METAP1D	0.110589	0.000896619
chr2	173558181	173558181	.	0.169655	0.0426167
chr2	178734743	178734743	TTN	-0.0917674	0.0474258
chr2	179657115	179657115	ZNF385B	-0.173213	0.000865586
chr2	190851259	190851259	.	0.0980043	0.000907469
chr2	195567715	195567715	.	6.65821	0.00265423
chr2	199248513	199248513	.	0.260729	0.000865586
chr2	201282777	201282777	CASP8	6.65821	0.000865586
chr2	202495212	202495212	BMPR2	0.0934232	0.000865586
chr2	203509391	203509391	RAPH1	0.0903657	0.000865586
chr2	206316015	206316015	.	-0.11474	0.000865586
chr2	208196700	208196700	.	0.220014	0.0341119
chr2	208285341	208285341	PIKFYVE	0.126456	0.000589814
chr2	209209459	209209459	.	-0.419669	0.0289411
chr2	213567388	213567388	SPAG16	6.65821	0.00922825
chr2	216177608	216177608	XRCC5	-0.174544	0.000960079
chr2	230871313	230871313	ITM2C	0.150846	0.0451884
chr2	238565665	238565665	.	0.114204	0.0414013
chr2	241497290	241497290	STK25	-0.105267	0.000865586
chr2	241957691	241957691	LINC01237	0.123266	0.0355651
chr20	4165202	4165202	SMOX	-0.141883	0.0417426
chr20	13763618	13763618	ESF1	-0.117004	0.000865586
chr20	16227494	16227494	.	6.65821	0.00265423
chr20	16227498	16227498	.	6.65821	0.00265423
chr20	21149394	21149394	KIZ	0.113019	0.000929146
chr20	23089310	23089310	.	-0.133315	0.0278149
chr20	25718474	25718474	.	-0.134747	0.000865586
chr20	25798510	25798510	FAM182B	-6.65821	0.00922825
chr20	26058076	26058076	FAM182A	6.65821	0.000645092
chr20	26059004	26059004	FAM182A	6.65821	0.02204
chr20	26063565	26063565	FAM182A	6.65821	0.00265423
chr20	26467438	26467438	.	0.385082	0.00188792
chr20	26467447	26467447	.	0.360313	0.000865586
chr20	26610470	26610470	.	0.166708	0.0294556
chr20	26610480	26610480	.	0.189911	0.000645092
chr20	26781788	26781788	.	6.65821	0.02204
chr20	26854246	26854246	.	-6.65821	0.00922825
chr20	26869876	26869876	.	6.65821	0.02204
chr20	26981201	26981201	.	6.65821	0.00922825
chr20	27072837	27072837	.	6.65821	0.02204
chr20	27191985	27191985	.	-6.65821	0.02204
chr20	27274911	27274911	.	-6.65821	0.02204
chr20	27345599	27345599	.	6.65821	0.00820257
chr20	27371526	27371526	.	-6.65821	9.07516e-05
chr20	27793590	27793590	.	-6.65821	0.02204
chr20	28017811	28017811	.	6.65821	0.000147141
chr20	28064166	28064166	.	0.767441	0.0294556
chr20	28253342	28253342	.	-6.65821	0.00922825
chr20	28306129	28306129	.	-0.985786	5.39616e-05
chr20	28310359	28310359	.	6.65821	0.00265423
chr20	28367424	28367424	.	6.65821	0.00820257
chr20	28367433	28367433	.	6.65821	0.00820257
chr20	28399252	28399252	.	6.65821	0.02204
chr20	28439321	28439321	.	6.65821	9.07516e-05
chr20	28479668	28479668	.	6.65821	0.00922825
chr20	28692307	28692307	.	6.65821	0.00265423
chr20	49142690	49142690	STAU1	0.0926697	0.000865586
chr20	56444562	56444562	CASS4	0.132849	0.0463662
chr20	57526795	57526795	.	-6.65821	0.00820257
chr20	58682916	58682916	STX16-NPEPL1	0.100252	0.000865586
chr20	64160193	64160193	.	0.184276	0.0339311
chr20	64230761	64230761	MYT1	0.229008	0.0221214
chr21	5118867	5118867	GATD3A,GATD3B	6.65821	0.000865586
chr21	5256901	5256901	.	0.21843	0.0138969
chr21	5348489	5348489	.	-4.51957	0.0247297
chr21	6078565	6078565	.	6.65821	0.02204
chr21	6134071	6134071	.	0.669527	0.0431807
chr21	6147312	6147312	.	6.65821	0.00265423
chr21	6148252	6148252	.	-6.65821	0.02204
chr21	6159061	6159061	.	-6.65821	0.02204
chr21	6308800	6308800	.	-6.65821	0.02204
chr21	6427724	6427724	.	0.410284	0.00627264
chr21	6448000	6448000	CBS,CBSL	-6.65821	0.00820257
chr21	6456876	6456876	CBS,CBSL	0.136076	0.0451949
chr21	6559894	6559894	.	5.70966	0.0343008
chr21	6567864	6567864	.	6.65821	0.00922825
chr21	8227324	8227324	LOC100507412,RNA28SN5	6.65821	0.00820257
chr21	8258459	8258459	RNA28SN5	-5.37421	0.018945
chr21	8396120	8396120	LOC100507412,RNA28SN5,RNA45SN3	-6.65821	0.02204
chr21	8397604	8397604	LOC100507412,RNA28SN3,RNA28SN5,RNA45SN3	6.65821	0.00820257
chr21	8397621	8397621	LOC100507412,RNA28SN3,RNA28SN5,RNA45SN3	6.65821	0.00820257
chr21	8397629	8397629	LOC100507412,RNA28SN3,RNA28SN5,RNA45SN3	6.65821	0.00820257
chr21	8397632	8397632	LOC100507412,RNA28SN3,RNA28SN5,RNA45SN3	6.65821	0.00820257
chr21	8397644	8397644	LOC100507412,RNA28SN3,RNA28SN5,RNA45SN3	6.65821	0.00820257
chr21	8397649	8397649	LOC100507412,RNA28SN3,RNA28SN5,RNA45SN3	6.65821	0.00820257
chr21	8401603	8401603	LOC100507412,RNA28SN3,RNA28SN5,RNA45SN3	-6.65821	0.00922825
chr21	13764793	13764793	LOC110091777	6.65821	0.00922825
chr21	15250245	15250245	.	-0.0882309	0.00105311
chr21	24333562	24333562	.	-0.151273	0.044884
chr21	33861674	33861674	ITSN1	0.0937593	0.000865586
chr21	35589703	35589703	.	-0.144446	0.000865586
chr21	36316938	36316938	.	0.127715	0.042599
chr21	42590185	42590185	.	-0.836615	1.94589e-05
chr21	43081435	43081435	.	-6.65821	0.00265423
chr21	43389345	43389345	.	6.65821	0.00922825
chr21	43393798	43393798	.	6.65821	0.00922825
chr21	43403940	43403940	.	6.65821	0.02204
chr21	43460755	43460755	.	6.65821	0.00265423
chr21	43535649	43535649	HSF2BP	6.65821	0.00265423
chr21	44120644	44120644	LOC102724159,PWP2	6.65821	0.02204
chr21	44168865	44168865	.	-6.65821	0.00820257
chr21	44175020	44175020	.	-6.65821	0.02204
chr21	44197290	44197290	.	0.274052	6.18829e-09
chr22	11232387	11232387	.	6.65821	0.02204
chr22	11269195	11269195	.	6.65821	1.76208e-05
chr22	15228768	15228768	.	6.65821	0.00820257
chr22	15642722	15642722	.	6.65821	0.00265423
chr22	15799228	15799228	DUXAP8	-6.65821	0.000865586
chr22	16349262	16349262	.	-6.65821	0.02204
chr22	16366777	16366777	.	6.65821	0.02204
chr22	16381221	16381221	.	6.65821	0.02204
chr22	18197805	18197805	FAM230D	6.65821	0.00265423
chr22	18486801	18486801	FAM230A	-6.65821	0.02204
chr22	18581336	18581336	.	-0.410284	0.00922825
chr22	18596717	18596717	.	0.222229	0.00757574
chr22	18718769	18718769	.	-6.65821	0.00922825
chr22	18834490	18834490	.	6.65821	0.02204
chr22	18908652	18908652	DGCR6,LOC102724770	-3.64338	0.0383694
chr22	21415223	21415223	.	-6.65821	0.000645092
chr22	21440800	21440800	HIC2	-6.65821	0.02204
chr22	21554151	21554151	UBE2L3	6.65821	0.02204
chr22	21577227	21577227	UBE2L3	0.14896	0.04809
chr22	22345086	22345086	.	-0.133553	2.48542e-13
chr22	23533961	23533961	.	6.65821	0.000865586
chr22	29172346	29172346	.	0.130794	1.82605e-14
chr22	32432372	32432372	BPIFC	0.0805651	0.0492156
chr22	34220955	34220955	.	-0.137369	0.0437057
chr22	34916595	34916595	LINC02885	-6.65821	0.00922825
chr22	35224817	35224817	LINC01399	-0.117847	0.000865586
chr22	38463630	38463630	.	-2.45804	0.0457458
chr22	43160270	43160270	TSPO	0.203098	0.036667
chr22	43862096	43862096	SULT4A1	2.98464	0.000933676
chr22	46363781	46363781	CELSR1	-0.268589	0.036828
chr22	47013905	47013905	TBC1D22A	0.127945	0.000865586
chr22	48560453	48560453	TAFA5	-0.108861	0.000865586
chr22	49169011	49169011	.	-0.139804	0.0463662
chr22	50316944	50316944	DENND6B	6.65821	0.00265423
chr22	50317045	50317045	DENND6B	6.65821	0.00265423
chr22	50803662	50803662	.	6.65821	0.00922825
chr3	11741	11741	.	-6.65821	0.00922825
chr3	4469783	4469783	.	-0.133054	0.000645092
chr3	8630961	8630961	SSUH2	-0.210416	0.0355828
chr3	10064774	10064774	FANCD2	0.150937	0.0433401
chr3	13215906	13215906	IQSEC1	-0.123268	0.0415574
chr3	16376617	16376617	RFTN1	-0.173775	0.0421311
chr3	16980116	16980116	PLCL2	6.65821	0.02204
chr3	19914952	19914952	EFHB	-0.0858251	0.000953565
chr3	23319568	23319568	UBE2E2	-0.160397	0.0458802
chr3	31674374	31674374	OSBPL10	0.113666	0.000865586
chr3	39130250	39130250	TTC21A	0.169571	0.041352
chr3	63853578	63853578	THOC7	0.0919698	0.000865586
chr3	73048126	73048126	PPP4R2	-0.0664867	0.000929993
chr3	76324966	76324966	ROBO2	0.26382	0.000645092
chr3	88546519	88546519	.	0.140974	0.0369606
chr3	91071615	91071615	.	6.65821	0.000865586
chr3	91637135	91637135	.	-6.65821	0.00922825
chr3	91638788	91638788	.	6.65821	0.000147141
chr3	91639040	91639040	.	-6.65821	0.02204
chr3	91687775	91687775	.	6.65821	0.00922825
chr3	91737978	91737978	.	6.65821	0.02204
chr3	91782370	91782370	.	6.65821	0.000147141
chr3	91886117	91886117	.	0.410284	0.00577193
chr3	92019402	92019402	.	6.65821	0.00265423
chr3	92068940	92068940	.	6.65821	0.02204
chr3	92128195	92128195	.	6.65821	0.000147141
chr3	92156695	92156695	.	-6.65821	0.02204
chr3	92156741	92156741	.	-6.65821	0.000865586
chr3	92389124	92389124	.	-6.65821	9.07516e-05
chr3	92398244	92398244	.	-6.65821	0.00922825
chr3	92502464	92502464	.	6.65821	0.02204
chr3	92999034	92999034	.	6.65821	0.02204
chr3	93008888	93008888	.	6.65821	1.15059e-06
chr3	93069141	93069141	.	6.65821	0.02204
chr3	93116735	93116735	.	0.577838	0.000890399
chr3	93305739	93305739	.	6.65821	0.00265423
chr3	93339743	93339743	.	-6.65821	0.00265423
chr3	93373208	93373208	.	6.65821	0.00265423
chr3	93445842	93445842	.	6.65821	0.00922825
chr3	93491290	93491290	.	6.65821	0.00922825
chr3	93534319	93534319	.	-6.65821	0.00922825
chr3	93595052	93595052	.	6.65821	0.02204
chr3	93764820	93764820	.	0.243532	0.000351082
chr3	98837768	98837768	DCBLD2	-6.65821	0.000865586
chr3	101487158	101487158	SENP7	0.0893631	0.000865586
chr3	103311579	103311579	.	0.0703963	0.00236612
chr3	114747640	114747640	ZBTB20	6.65821	0.00922825
chr3	119045268	119045268	IGSF11	0.195016	0.000865586
chr3	151336326	151336326	MED12L	-0.536155	0.00131381
chr3	156673062	156673062	.	0.101663	0.000865586
chr3	184602738	184602738	.	6.65821	0.00922825
chr3	196829628	196829628	PAK2	0.0650453	0.000865586
chr4	11155	11155	.	6.65821	9.07516e-05
chr4	3015600	3015600	GRK4	0.102794	0.000865586
chr4	3341470	3341470	RGS12	-6.65821	0.00922825
chr4	6234064	6234064	.	0.129164	0.000589814
chr4	7735468	7735468	SORCS2	-0.216712	0.0375238
chr4	8475138	8475138	TRMT44	0.0899439	0.0457458
chr4	8625403	8625403	.	0.284138	0.0120125
chr4	8625410	8625410	.	1.06659	0.00315598
chr4	8968578	8968578	.	0.14557	0.000870605
chr4	9040941	9040941	.	6.65821	0.02204
chr4	9071932	9071932	.	0.231275	0.00517128
chr4	9157037	9157037	.	0.223957	0.0338963
chr4	9157440	9157440	.	-0.149023	0.0463662
chr4	9157590	9157590	.	0.241297	0.0394246
chr4	9160811	9160811	.	0.0988192	0.0458802
chr4	9171560	9171560	.	-0.218874	0.0473866
chr4	9171705	9171705	.	-0.240627	0.00507521
chr4	9174797	9174797	FAM90A26	0.199691	0.0372148
chr4	9338950	9338950	.	6.65821	0.02204
chr4	27213577	27213577	.	0.224152	0.000865586
chr4	37613828	37613828	RELL1	-0.0878581	0.000865586
chr4	42107068	42107068	.	0.139011	5.08006e-15
chr4	46055846	46055846	GABRG1	6.65821	0.02204
chr4	49135372	49135372	.	6.65821	0.00922825
chr4	49733462	49733462	.	0.360313	0.000233416
chr4	49906235	49906235	.	6.65821	0.00265423
chr4	49929856	49929856	.	6.65821	0.000147141
chr4	50269911	50269911	.	-6.65821	9.07516e-05
chr4	50368698	50368698	.	6.3821	0.0276374
chr4	50372084	50372084	.	6.65821	0.00265423
chr4	50404058	50404058	.	6.65821	0.02204
chr4	50619637	50619637	.	0.985786	0.00272712
chr4	50985335	50985335	.	-6.65821	0.000865586
chr4	50989144	50989144	.	6.65821	0.00922825
chr4	51180601	51180601	.	-6.65821	0.000865586
chr4	51461386	51461386	.	6.65821	0.00265423
chr4	51625862	51625862	.	-6.65821	0.00922825
chr4	51656632	51656632	.	6.65821	0.02204
chr4	51695420	51695420	.	6.65821	0.02204
chr4	52810080	52810080	LINC01618	0.252066	0.0462669
chr4	67575455	67575455	STAP1	1.70281	0.00384314
chr4	79967557	79967557	ANTXR2	-6.65821	0.00922825
chr4	94575358	94575358	PDLIM5	0.128679	0.000915949
chr4	107903348	107903348	CYP2U1-AS1,SGMS2	-0.0904205	0.00126112
chr4	128704917	128704917	.	-0.0979206	0.00204491
chr4	148060027	148060027	ARHGAP10	0.318361	0.00709522
chr4	164978173	164978173	.	0.116998	0.000737809
chr4	169378553	169378553	.	-0.177587	0.00153216
chr4	171483635	171483635	.	0.122527	0.000865586
chr4	186174455	186174455	FAM149A	-0.184595	0.000896619
chr4	186265124	186265124	.	-0.170353	0.0361668
chr4	187614455	187614455	LINC02492	-2.73987	0.0352334
chr4	187681605	187681605	.	-2.83771	0.02204
chr4	188333346	188333346	.	-0.348712	0.000865586
chr5	1024847	1024847	NKD2	6.65821	0.000865586
chr5	3117835	3117835	.	2.43527	0.0321291
chr5	10639443	10639443	ANKRD33B	6.65821	0.00922825
chr5	26807760	26807760	.	-0.107854	0.00249482
chr5	30442995	30442995	.	0.0963439	0.000865586
chr5	35193964	35193964	PRLR	-0.11766	0.0441414
chr5	38391815	38391815	EGFLAM	0.0911894	0.0386575
chr5	38451728	38451728	EGFLAM	0.154709	0.00093136
chr5	46505971	46505971	.	-0.583773	0.00236612
chr5	46639560	46639560	.	1.24317	0.02204
chr5	46651511	46651511	.	-6.65821	0.000865586
chr5	46761957	46761957	.	-6.65821	1.76208e-05
chr5	46879957	46879957	.	6.65821	0.02204
chr5	46900304	46900304	.	6.65821	0.00820257
chr5	47160991	47160991	.	6.65821	0.000645092
chr5	47259289	47259289	.	0.146536	0.0109394
chr5	47287210	47287210	.	-6.65821	0.00922825
chr5	52936036	52936036	ITGA1	6.65821	0.02204
chr5	52936044	52936044	ITGA1	6.65821	0.00265423
chr5	67648237	67648237	.	-0.0977692	0.0339279
chr5	69977681	69977681	GUSBP14,GUSBP16	6.65821	0.00922825
chr5	70348365	70348365	GUSBP3	6.65821	0.00265423
chr5	70416382	70416382	GTF2H2,GTF2H2B,GTF2H2C,GUSBP3	6.65821	0.00265423
chr5	70416418	70416418	GTF2H2,GTF2H2B,GTF2H2C,GUSBP3	6.65821	0.00265423
chr5	70416422	70416422	GTF2H2,GTF2H2B,GTF2H2C,GUSBP3	6.65821	0.00265423
[truncated: 281 more rows]
